# Supplementary material for: Enantioselective construction of tricyclic pyrrolidine-fused benzo[b]thiophene 1,1-dioxide derivatives via copper(i)-catalyzed asymmetric 1,3-dipolar cycloaddition
Source: Royal Society of Chemistry journal article supplement (doi:10.1039/c7qo00640c), 2017-01-01

# Enantioselective Construction of Tricyclic Pyrrolidine-Fused Benzo[*b*]thiophene 1,1-Dioxides Derivatives *via* Copper(I)-Catalyzed Asymmetric 1,3-Dipolar Cycloaddition

Hua Deng, Fu-Sheng He, Cong-Shan Li, Wu-Lin Yang and Wei-Ping Deng\*

School of Pharmacy and Shanghai Key Laboratory of New Drug Design, East China University of Science and Technology, 130 Meilong Road, Shanghai 200237, China

## Contents

|                                                                                                        |    |
|--------------------------------------------------------------------------------------------------------|----|
| 1. General information                                                                                 | 1  |
| 2. Table S1. Bases and solvents screening of the reaction conditions                                   | 2  |
| 3. General procedure for the asymmetric 1,3-dipolar cycloaddition                                      | 2  |
| 4. Gram scale procedure for the asymmetric cycloaddition of 1c to 2a                                   | 15 |
| 5. Transformation of cycloadduct 3ca                                                                   | 16 |
| 6. The absolute configuration determination of (1 <i>S</i> ,3 <i>S</i> ,3 <i>aR</i> ,8 <i>bR</i> )-3aa | 17 |
| 7. References                                                                                          | 19 |
| 8. Chiral HPLC chromatograms                                                                           | 19 |
| 9. <sup>1</sup> H NMR and <sup>13</sup> C NMR spectra                                                  | 50 |

## 1. General information

<sup>1</sup>H NMR spectrum were recorded on a Bruker DPX 400 MHz spectrometer in CDCl<sub>3</sub>. Chemical shifts were reported in ppm with the internal TMS signal at 0.0 ppm as a standard. The spectrums are interpreted as: s = singlet, d = doublet, t = triplet, q = quartet, m = multiplet, dd = doublet of doublets, brs = broad singlet, coupling constant(s) *J* are reported in Hz and relative integrations are reported. <sup>13</sup>C NMR (100 MHz) spectrums were recorded on a Bruker DPX 400 MHz spectrometer in CDCl<sub>3</sub>. Chemical shifts were reported in ppm with the internal chloroform signal at 77.16 ppm as a standard. Optical rotations were measured on an AUTOPOL V. Diastereomeric ratios and enantiomeric excesses were determined from crude <sup>1</sup>H NMR spectroscopy interpretation or by analysis of HPLC traces, obtained by using chiralpak AS-H, AD-H, IA or chiralcel OD-H columns with *n*-hexane and *i*-propanol or ethanol as solvents. (Chiralpak AS-H, AD-H, IA and chiralcel OD-H columns were purchased from Daicel Chemical Industries, LTD.) Melting points were obtained in open capillary tubes using SGW X-4 micro melting point apparatus which were uncorrected. Mass spectrums were recorded on TOF mass Finigann MAT8401 spectrometer. Solvents were dried and distilled following usual protocols. Commercially available materials purchased from Adamas-beta, TCI or Energy Chemical and were used as received. Benzo[*b*]thiophene 1,1-dioxides **2** were prepared according to the literature procedure.<sup>1</sup>

## 2. Table S1. Bases and solvents screening of the reaction conditions<sup>a</sup>

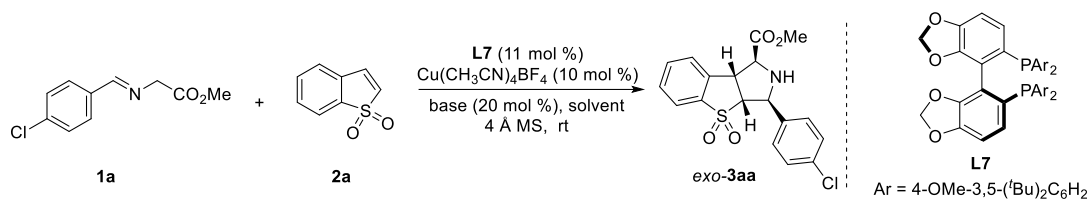

| entry           | solvent                              | base                                | yield (%) <sup>b</sup> | dr <sup>c</sup> | ee (%) <sup>c</sup> |
|-----------------|--------------------------------------|-------------------------------------|------------------------|-----------------|---------------------|
| 1 <sup>d</sup>  | CH <sub>2</sub> Cl <sub>2</sub>      | DIPEA                               | nr                     | nd              | nd                  |
| 2 <sup>d</sup>  | CH <sub>2</sub> Cl <sub>2</sub>      | DABCO                               | trace                  | nd              | nd                  |
| 3               | CH <sub>2</sub> Cl <sub>2</sub>      | DBU                                 | 88                     | 9:1             | 97                  |
| 4 <sup>e</sup>  | CH <sub>2</sub> Cl <sub>2</sub>      | TMG                                 | 90                     | 7:1             | 97                  |
| <b>5</b>        | <b>CH<sub>2</sub>Cl<sub>2</sub></b>  | <b>CS<sub>2</sub>CO<sub>3</sub></b> | <b>94</b>              | <b>9:1</b>      | <b>97</b>           |
| 6 <sup>d</sup>  | THF                                  | CS <sub>2</sub> CO <sub>3</sub>     | 74                     | 9:1             | 96                  |
| 7 <sup>d</sup>  | Toluene                              | CS <sub>2</sub> CO <sub>3</sub>     | 90                     | 3:1             | 96                  |
| 8 <sup>d</sup>  | Et <sub>2</sub> O                    | CS <sub>2</sub> CO <sub>3</sub>     | 45                     | 3:1             | 90                  |
| 9 <sup>d</sup>  | CH <sub>3</sub> CN                   | CS <sub>2</sub> CO <sub>3</sub>     | 54                     | 8:1             | 96                  |
| 10 <sup>e</sup> | CPME                                 | CS <sub>2</sub> CO <sub>3</sub>     | 73                     | 4:1             | 95                  |
| 11 <sup>e</sup> | TBME                                 | CS <sub>2</sub> CO <sub>3</sub>     | 66                     | 3:1             | 77                  |
| 12 <sup>d</sup> | CH <sub>3</sub> Cl                   | CS <sub>2</sub> CO <sub>3</sub>     | 75                     | 9:1             | 95                  |
| 13 <sup>d</sup> | ClCH <sub>2</sub> CH <sub>2</sub> Cl | CS <sub>2</sub> CO <sub>3</sub>     | 74                     | 7:1             | 97                  |

<sup>a</sup>Unless otherwise stated, reactions were performed with **1a** (0.15 mmol), **2a** (0.10 mmol) in 1 mL of solvents (C = 0.1 M), under an N<sub>2</sub> atmosphere; nr = No reaction; nd = not detected; DIPEA = N,N-Diisopropylethylamine, DABCO = 1,4-Diazabicyclo[2.2.2]octane, DBU = 1,8-Diazabicyclo[5.4.0]undec-7-ene, TMG = Tetramethylguanidine, CPME = Cyclopentyl methyl ether, TBME = <sup>t</sup>Butyl methyl ether. <sup>b</sup>Isolated yield. <sup>c</sup>The dr was determined by <sup>1</sup>H NMR spectroscopy or/and chiral HPLC analysis, the ee was determined by chiral HPLC analysis. <sup>d</sup>24 h. <sup>e</sup>10 h.

## 3. General procedure for the asymmetric 1,3-dipolar cycloaddition

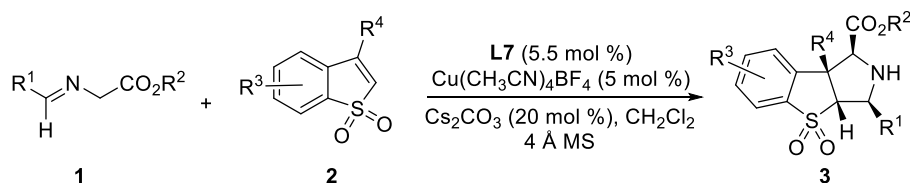

At nitrogen atmosphere, Cu(CH<sub>3</sub>CN)<sub>4</sub>BF<sub>4</sub> (3.1 mg, 0.01 mmol) and **L7** (13.0 mg, 0.011mmol) were dissolved in 2 mL CH<sub>2</sub>Cl<sub>2</sub>, and stirred at room temperature for about 1 h. Then, iminoester **1** (0.3 mmol) and Cs<sub>2</sub>CO<sub>3</sub> (13.0 mg, 0.04 mmol) were added, the mixture was cooled to 0 °C and benzo[*b*]thiophene 1,1-dioxide **2** (0.2 mmol) was added. Once starting material was consumed (monitored by TLC), the mixture was concentrated and the residue was purified by column chromatography (petroleum ether/ethyl acetate 15:1 to 6:1) on silica gel to afford the corresponding product **3**.

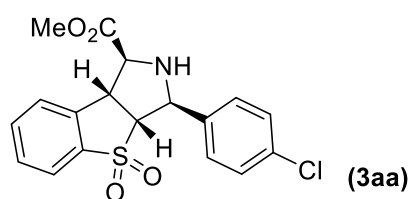

### Methyl

#### (1S,3S,3aR,8bR)-3-(4-chlorophenyl)-2,3,3a,8b-tetrahydro-1H-benzo[4,5]thieno[2,3-c]pyrrole-1-carboxylate 4,4-dioxide

White solid, yield: 70.1 mg, 93%; m.p.: 158-160 °C;  $[\alpha]_D^{25} = -95.2$  (*c* 1.05, CH<sub>2</sub>Cl<sub>2</sub>); <sup>1</sup>H NMR (400 MHz, CDCl<sub>3</sub>) δ 7.75 (d, *J* = 7.8 Hz, 1H), 7.71-7.59 (m, 2H), 7.61-7.52 (m, 1H), 7.53-7.48 (m, 2H), 7.40-7.34 (m, 2H), 4.83 (d, *J* = 7.1 Hz, 1H), 4.49 (dd, *J* = 9.4, 7.2 Hz, 1H), 3.97 (d, *J* = 7.1 Hz, 1H), 3.93 (dd, *J* = 9.5, 7.1 Hz, 1H), 3.88 (s, 3H), 2.76 (s, 1H); <sup>13</sup>C NMR (100 MHz, CDCl<sub>3</sub>) δ 171.8, 138.7, 138.2, 136.7, 134.4, 134.2, 130.2, 129.1, 128.5, 127.4, 122.1, 70.3, 66.2, 62.2, 53.0, 49.0; HRMS (ESI, *m/z*) calcd for C<sub>18</sub>H<sub>16</sub>ClNO<sub>4</sub>S [M+H]<sup>+</sup>: 378.0561, found: 378.0566; HPLC (Chiralcel OD-H, *n*-hexane/EtOH = 90/10, 0.8 mL/min, 220 nm) *t*<sub>R</sub> = 33.95 min, 40.41 min, 45.16 min (minor diastereomer), 49.11 min (minor diastereomer).

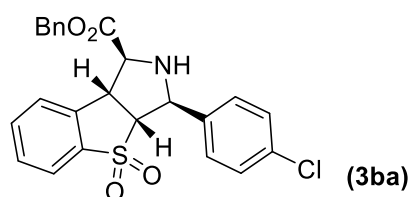

### Benzyl

#### (1S,3S,3aR,8bR)-3-(4-chlorophenyl)-2,3,3a,8b-tetrahydro-1H-benzo[4,5]thieno[2,3-c]pyrrole-1-carboxylate 4,4-dioxide

White solid, yield: 81.5 mg, 90%; m.p.: 78-80 °C;  $[\alpha]_D^{25} = -10.1$  (*c* 0.95, CH<sub>2</sub>Cl<sub>2</sub>); <sup>1</sup>H NMR (400 MHz, CDCl<sub>3</sub>) δ 7.74 (d, *J* = 7.4 Hz, 1H), 7.60-7.47 (m, 5H), 7.46-7.32 (m, 7H), 5.34 (d, *J* = 12.1 Hz, 1H), 5.26 (d, *J* = 12.1 Hz, 1H), 4.84 (d, *J* = 6.9 Hz, 1H), 4.46 (dd, *J* = 9.4, 7.2 Hz, 1H), 4.00 (d, *J* = 7.1 Hz, 1H), 3.92 (dd, *J* = 9.4, 6.9 Hz, 1H), 2.78 (brs, 1H), 1.57 (s, 3H); <sup>13</sup>C NMR (100 MHz, CDCl<sub>3</sub>) δ 171.2, 138.7, 138.3, 136.6, 135.1, 134.4, 134.2, 130.2, 129.1, 129.0, 128.9, 128.7, 128.5, 127.4, 122.1, 70.5, 67.9, 66.3, 62.1, 49.1; HRMS (ESI, *m/z*) calcd for C<sub>24</sub>H<sub>20</sub>ClNO<sub>4</sub>S [M+H]<sup>+</sup>: 454.0874, found: 454.0880; HPLC (Chiralcel OD-H, *n*-hexane/EtOH = 90/10, 0.8 mL/min, 220 nm) *t*<sub>R</sub> = 33.41 min (minor diastereomer), 35.47 min (minor diastereomer), 38.01 min, 41.27 min.

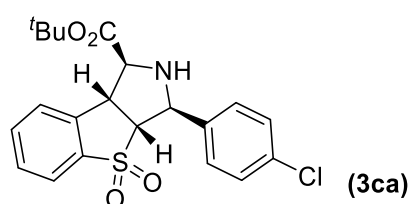

### <sup>t</sup>Butyl

#### (1*S*,3*S*,3*aR*,8*bR*)-3-(4-chlorophenyl)-2,3,3*a*,8*b*-tetrahydro-1*H*-benzo[4,5]thieno[2,3-*c*]pyrrole-1-carboxylate 4,4-dioxide

White solid, yield: 78.8 mg, 94%; m.p.: 144-146 °C;  $[\alpha]_{\text{D}}^{25} = -5.0$  (c 1.04, CH<sub>2</sub>Cl<sub>2</sub>); <sup>1</sup>H NMR (400 MHz, CDCl<sub>3</sub>) δ 7.75 (d, *J* = 7.8 Hz, 1H), 7.70-7.54 (m, 3H), 7.51 (d, *J* = 8.4 Hz, 2H), 7.37 (d, *J* = 8.5 Hz, 2H), 4.81-4.73 (m, 1H), 4.41 (dd, *J* = 9.5, 6.9 Hz, 1H), 3.92 (dd, *J* = 9.5, 7.4 Hz, 1H), 3.90-3.82 (m, 1H), 2.71 (brs, 1H), 1.57 (s, 9H); <sup>13</sup>C NMR (100 MHz, CDCl<sub>3</sub>) δ 170.6, 138.7, 138.2, 137.2, 134.3, 134.2, 130.1, 129.1, 128.6, 127.3, 122.1, 83.2, 70.4, 67.1, 62.5, 49.6, 28.2; HRMS (ESI, *m/z*) calcd for C<sub>21</sub>H<sub>22</sub>ClNO<sub>4</sub>S [M+H]<sup>+</sup>: 420.1031, found: 420.1036; HPLC (Chiralpak AS-H, *n*-hexane/EtOH = 90/10, 0.8 mL/min, 220 nm) *t*<sub>R</sub> = 22.40 min, 32.97 min (minor diastereomer), 40.85 min (minor diastereomer), 56.16 min.

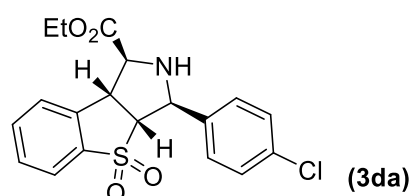

### Ethyl

#### (1*S*,3*S*,3*aR*,8*bR*)-3-(4-chlorophenyl)-2,3,3*a*,8*b*-tetrahydro-1*H*-benzo[4,5]thieno[2,3-*c*]pyrrole-1-carboxylate 4,4-dioxide

White solid, yield: 70.4 mg, 90%; m.p.: 142-144 °C;  $[\alpha]_{\text{D}}^{25} = -12.5$  (c 0.96, CH<sub>2</sub>Cl<sub>2</sub>); <sup>1</sup>H NMR (400 MHz, CDCl<sub>3</sub>) δ 7.75 (d, *J* = 7.8 Hz, 1H), 7.70-7.54 (m, 3H), 7.51 (d, *J* = 8.4 Hz, 2H), 7.37 (d, *J* = 8.5 Hz, 2H), 4.83 (d, *J* = 7.1 Hz, 1H), 4.48 (dd, *J* = 9.4, 7.1 Hz, 1H), 4.34 (qd, *J* = 7.1, 1.5 Hz, 2H), 3.98-3.90 (m, 2H), 2.77 (brs, 1H), 1.37 (t, *J* = 7.1 Hz, 3H); <sup>13</sup>C NMR (100 MHz, CDCl<sub>3</sub>) δ 171.4, 138.7, 138.3, 136.9, 134.4, 134.2, 130.2, 129.2, 128.6, 127.4, 122.1, 70.4, 66.4, 62.3, 62.2, 49.2, 14.4; HRMS (ESI, *m/z*) calcd for C<sub>19</sub>H<sub>18</sub>ClNO<sub>4</sub>S [M+H]<sup>+</sup>: 392.0718, found: 392.0723; HPLC (Chiralcel OD-H, *n*-hexane/EtOH = 90/10, 0.8 mL/min, 220 nm) *t*<sub>R</sub> = 22.49 min, 25.36 min, 30.45 min (minor diastereomer), 33.53 min (minor diastereomer).

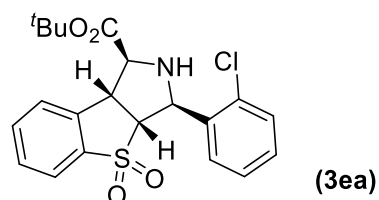

### <sup>t</sup>Butyl

#### (1*S*,3*S*,3*aR*,8*bR*)-3-(2-chlorophenyl)-2,3,3*a*,8*b*-tetrahydro-1*H*-benzo[4,5]thieno[2,3-*c*]pyrrole-1-carboxylate 4,4-dioxide

White solid, yield: 77.1 mg, 92%; m.p.: 130-132 °C;  $[\alpha]_{\text{D}}^{25} = +45.3$  (c 0.91, CH<sub>2</sub>Cl<sub>2</sub>); <sup>1</sup>H NMR

(400 MHz, CDCl<sub>3</sub>)  $\delta$  7.76 (d,  $J$  = 8.6 Hz, 2H), 7.67-7.60 (m, 1H), 7.60-7.51 (m, 2H), 7.41 (m, 1H), 7.36-7.27 (m, 2H), 5.27 (d,  $J$  = 5.1 Hz, 1H), 4.40 (dd,  $J$  = 9.0, 7.7 Hz, 1H), 4.17 (dd,  $J$  = 9.0, 5.1 Hz, 1H), 3.88 (d,  $J$  = 7.7 Hz, 1H), 3.06 (brs, 1H), 1.55 (s, 9H); <sup>13</sup>C NMR (100 MHz, CDCl<sub>3</sub>)  $\delta$  170.8, 138.4, 137.4, 136.7, 134.1, 133.3, 130.3, 130.1, 129.6, 129.5, 127.4, 127.4, 122.2, 82.9, 70.4, 67.5, 59.8, 49.0, 28.2; **HRMS** (ESI,  $m/z$ ) calcd for C<sub>21</sub>H<sub>22</sub>ClNO<sub>4</sub>S [M+H]<sup>+</sup>: 420.1031, found: 420.1036; **HPLC** (Chiralpak IA, *n*-hexane/EtOH = 90/10, 0.8 mL/min, 220 nm)  $t_R$  = 24.06 min, 27.65 min (minor diastereomer), 34.14 min, 40.05 min (minor diastereomer).

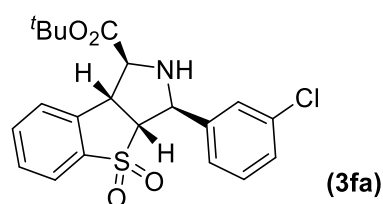

#### <sup>t</sup>Butyl

#### **(1S,3S,3aR,8bR)-3-(3-chlorophenyl)-2,3,3a,8b-tetrahydro-1H-benzo[4,5]thieno[2,3-c]pyrrole-1-carboxylate 4,4-dioxide**

White solid, yield: 82.9 mg, 99%; m.p.: 110-112 °C;  $[\alpha]_D^{25}$  = +1.5 (*c* 1.00, CH<sub>2</sub>Cl<sub>2</sub>); <sup>1</sup>H NMR (400 MHz, CDCl<sub>3</sub>)  $\delta$  7.75 (d,  $J$  = 7.8 Hz, 1H), 7.71-7.52 (m, 4H), 7.47-7.40 (m, 1H), 7.36-7.28 (m, 2H), 4.80 (d,  $J$  = 6.8 Hz, 1H), 4.42 (dd,  $J$  = 9.2, 7.1 Hz, 1H), 3.95 (dd,  $J$  = 9.4, 7.1 Hz, 1H), 3.86 (d,  $J$  = 6.9 Hz, 1H), 2.73 (brs, 1H), 1.57 (s, 9H); <sup>13</sup>C NMR (100 MHz, CDCl<sub>3</sub>)  $\delta$  170.5, 142.0, 138.6, 137.1, 134.9, 134.3, 130.3, 130.1, 128.5, 127.3, 127.2, 125.5, 122.1, 83.2, 70.4, 67.2, 62.4, 49.4, 28.2; **HRMS** (ESI,  $m/z$ ) calcd for C<sub>21</sub>H<sub>22</sub>ClNO<sub>4</sub>S [M+H]<sup>+</sup>: 420.1031, found: 420.1036; **HPLC** (Chiralpak AS-H, *n*-hexane/EtOH = 90/10, 0.8 mL/min, 220 nm)  $t_R$  = 24.05 min, 28.08 min (minor diastereomer), 33.47 min (minor diastereomer), 57.81 min.

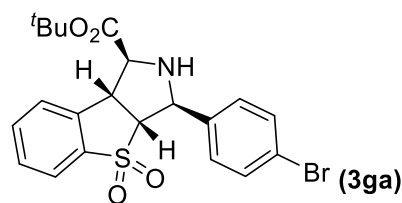

#### <sup>t</sup>Butyl

#### **(1S,3S,3aR,8bR)-3-(4-bromophenyl)-2,3,3a,8b-tetrahydro-1H-benzo[4,5]thieno[2,3-c]pyrrole-1-carboxylate 4,4-dioxide**

White solid, yield: 78.7 mg, 85%; m.p.: 132-135 °C;  $[\alpha]_D^{25}$  = -11.0 (*c* 1.04, CH<sub>2</sub>Cl<sub>2</sub>); <sup>1</sup>H NMR (400 MHz, CDCl<sub>3</sub>)  $\delta$  7.75 (d,  $J$  = 7.8 Hz, 1H), 7.71-7.54 (m, 2H), 7.57-7.49 (m, 3H), 7.49-7.42 (m, 2H), 4.76 (t,  $J$  = 6.9 Hz, 1H), 4.40 (dd,  $J$  = 9.5, 6.9 Hz, 1H), 3.92 (dd,  $J$  = 9.5, 7.4 Hz, 1H),

3.89-3.82 (m, 1H), 2.76-2.68 (m, 1H), 1.57 (s, 9H);  $^{13}\text{C}$  NMR (100 MHz,  $\text{CDCl}_3$ )  $\delta$  170.6, 138.7, 138.7, 137.1, 134.3, 132.1, 130.1, 128.9, 127.3, 122.3, 122.1, 83.2, 70.4, 67.1, 62.5, 49.6, 28.2; **HRMS** (ESI,  $m/z$ ) calcd for  $\text{C}_{21}\text{H}_{22}\text{BrNO}_4\text{S}$   $[\text{M}+\text{H}]^+$ : 464.0526, found: 464.0531; **HPLC** (Chiralpak AS-H, *n*-hexane/EtOH = 90/10, 1.0 mL/min, 220 nm)  $t_{\text{R}}$  = 21.11 min, 32.47 min (minor diastereomer), 38.22 min (minor diastereomer), 62.05 min.

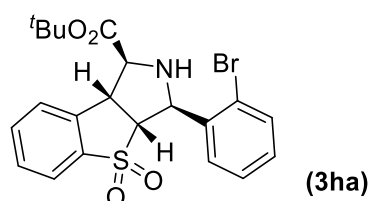

**<sup>t</sup>Butyl**

**(1S,3S,3aR,8bR)-3-(2-bromophenyl)-2,3,3a,8b-tetrahydro-1H-benzo[4,5]thieno[2,3-c]pyrrole-1-carboxylate 4,4-dioxide**

White solid, yield: 80.6 mg, 87%; m.p.: 60-62 °C;  $[\alpha]_{\text{D}}^{25} = +50.6$  (*c* 0.95,  $\text{CH}_2\text{Cl}_2$ );  $^1\text{H}$  NMR (400 MHz,  $\text{CDCl}_3$ )  $\delta$  7.81-7.73 (m, 2H), 7.67-7.51 (m, 4H), 7.37 (td,  $J = 7.6, 1.0$  Hz, 1H), 7.20 (td,  $J = 7.7, 1.6$  Hz, 1H), 5.30 (d,  $J = 4.7$  Hz, 1H), 4.45-4.37 (m, 1H), 4.16 (dd,  $J = 8.9, 4.7$  Hz, 1H), 3.89 (d,  $J = 7.8$  Hz, 1H), 3.05 (brs, 1H), 1.55 (s, 9H);  $^{13}\text{C}$  NMR (100 MHz,  $\text{CDCl}_3$ )  $\delta$  170.9, 139.2, 138.4, 136.8, 134.1, 133.6, 130.1, 129.9, 129.7, 128.0, 127.4, 123.4, 122.2, 82.8, 70.8, 67.6, 61.6, 48.7, 28.2; **HRMS** (ESI,  $m/z$ ) calcd for  $\text{C}_{21}\text{H}_{22}\text{BrNO}_4\text{S}$   $[\text{M}+\text{H}]^+$ : 464.0526, found: 464.0531; **HPLC** (Chiralpak AD-H, *n*-hexane/*i*-propanol = 80/20, 0.8 mL/min, 220 nm)  $t_{\text{R}}$  = 13.50 min, 16.33 min, 18.13 min (minor diastereomer), 19.58 min (minor diastereomer).

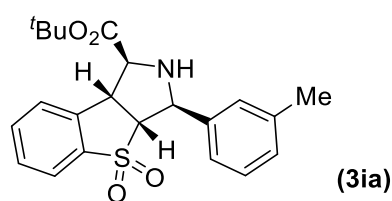

**<sup>t</sup>Butyl**

**(1S,3S,3aR,8bR)-3-(*m*-tolyl)-2,3,3a,8b-tetrahydro-1H-benzo[4,5]thieno[2,3-c]pyrrole-1-carboxylate 4,4-dioxide**

White solid, yield: 75.8 mg, 95%; m.p.: 107-109 °C;  $[\alpha]_{\text{D}}^{25} = +0.7$  (*c* 1.09,  $\text{CH}_2\text{Cl}_2$ );  $^1\text{H}$  NMR (400 MHz,  $\text{CDCl}_3$ )  $\delta$  7.75 (d,  $J = 7.7$  Hz, 1H), 7.69-7.60 (m, 2H), 7.59-7.53 (m, 1H), 7.36-7.26 (m, 3H), 7.14 (d,  $J = 7.3$  Hz, 1H), 4.76 (t,  $J = 7.4$  Hz, 1H), 4.39 (dd,  $J = 9.6, 7.0$  Hz, 1H), 4.01 (dd,  $J = 9.5, 7.4$  Hz, 1H), 3.85 (t,  $J = 6.9$  Hz, 1H), 2.79-2.68 (m, 1H), 2.38 (s, 3H), 1.57 (s, 9H);  $^{13}\text{C}$  NMR (100 MHz,  $\text{CDCl}_3$ )  $\delta$  170.8, 139.4, 138.9, 138.7, 137.2, 134.2, 130.0, 129.2, 128.9, 127.8, 127.2, 124.2, 122.1, 83.1, 70.4, 67.4, 63.3, 50.3, 28.2, 21.6; **HRMS** (ESI,  $m/z$ ) calcd for  $\text{C}_{22}\text{H}_{25}\text{NO}_4\text{S}$

[M+H]<sup>+</sup>: 400.1577, found: 400.1583; **HPLC** (Chiralpak AS-H, *n*-hexane/EtOH = 90/10, 1.0 mL/min, 220 nm) t<sub>R</sub> = 9.18 min (minor diastereomer), 15.09 min, 20.67 min (minor diastereomer), 41.76 min.

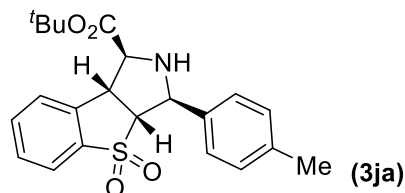

**Butyl**

**(1S,3S,3aR,8bR)-3-(*p*-tolyl)-2,3,3a,8b-tetrahydro-1H-benzo[4,5]thieno[2,3-*c*]pyrrole-1-carboxylate 4,4-dioxide**

White solid, yield: 75.8 mg, 95%; m.p.: 143-145 °C; [α]<sub>D</sub><sup>25</sup> = -8.2 (*c* 0.90, CH<sub>2</sub>Cl<sub>2</sub>); **<sup>1</sup>H NMR** (400 MHz, CDCl<sub>3</sub>) δ 7.75 (d, *J* = 7.8 Hz, 1H), 7.68-7.60 (m, 2H), 7.59-7.52 (m, 1H), 7.43 (d, *J* = 8.1 Hz, 2H), 7.21 (d, *J* = 7.9 Hz, 2H), 4.75 (d, *J* = 7.4 Hz, 1H), 4.39 (dd, *J* = 9.4, 7.0 Hz, 1H), 3.98 (dd, *J* = 9.5, 7.5 Hz, 1H), 3.85 (d, *J* = 6.9 Hz, 1H), 2.73 (brs, 1H), 2.36 (s, 3H), 1.57 (s, 9H); **<sup>13</sup>C NMR** (100 MHz, CDCl<sub>3</sub>) δ 170.8, 138.9, 138.1, 137.3, 136.4, 134.2, 130.0, 129.7, 127.2, 127.1, 122.1, 83.1, 70.4, 67.3, 63.2, 50.3, 28.2, 21.3; **HRMS** (ESI, *m/z*) calcd for C<sub>22</sub>H<sub>25</sub>NO<sub>4</sub>S [M+H]<sup>+</sup>: 400.1577, found: 400.1583; **HPLC** (Chiralpak AS-H, *n*-hexane/EtOH = 90/10, 1.0 mL/min, 220 nm) t<sub>R</sub> = 10.64 min (minor diastereomer), 17.31 min, 21.79 min (minor diastereomer), 63.66 min.

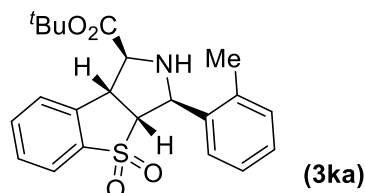

**Butyl**

**(1S,3S,3aR,8bR)-3-(*o*-tolyl)-2,3,3a,8b-tetrahydro-1H-benzo[4,5]thieno[2,3-*c*]pyrrole-1-carboxylate 4,4-dioxide**

White solid, yield: 71.9 mg, 90%; m.p.: 188-190 °C; [α]<sub>D</sub><sup>25</sup> = +24.0 (*c* 0.99, CH<sub>2</sub>Cl<sub>2</sub>); **<sup>1</sup>H NMR** (400 MHz, CDCl<sub>3</sub>) δ 7.74 (d, *J* = 7.7 Hz, 1H), 7.68-7.52 (m, 4H), 7.31-7.17 (m, 3H), 5.06 (d, *J* = 6.1 Hz, 1H), 4.45-4.33 (dd, *J* = 9.3, 6.2 Hz, 1H), 4.07 (dd, *J* = 9.3, 7.3 Hz, 1H), 3.86 (d, *J* = 7.4 Hz, 1H), 2.68 (brs, 1H), 2.49 (s, 3H), 1.56 (s, 9H); **<sup>13</sup>C NMR** (100 MHz, CDCl<sub>3</sub>) δ 170.8, 138.6, 137.9, 137.0, 136.8, 134.1, 131.1, 130.0, 128.2, 127.4, 126.7, 126.3, 122.1, 82.9, 70.9, 67.5, 58.9, 49.9, 28.2, 19.7; **HRMS** (ESI, *m/z*) calcd for C<sub>22</sub>H<sub>25</sub>NO<sub>4</sub>S [M+H]<sup>+</sup>: 400.1577, found: 400.1583; **HPLC** (Chiralpak AD-H, *n*-hexane/*i*-propanol = 80/20, 0.8 mL/min, 220 nm) t<sub>R</sub> = 12.74 min, 13.71 min, 17.91 min (minor diastereomer), 22.05 min (minor diastereomer).



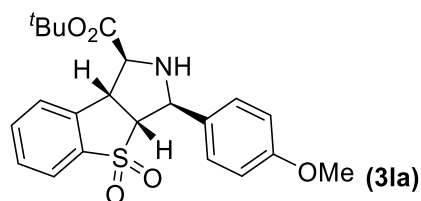

#### **<sup>t</sup>Butyl**

#### **(1S,3S,3aR,8bR)-3-(4-methoxyphenyl)-2,3,3a,8b-tetrahydro-1H-benzo[4,5]thieno[2,3-c]pyrrole-1-carboxylate 4,4-dioxide**

White solid, yield: 77.2 mg, 93%; m.p.: 146-148 °C;  $[\alpha]_{\text{D}}^{25} = -6.3$  (*c* 1.00, CH<sub>2</sub>Cl<sub>2</sub>); **<sup>1</sup>H NMR** (400 MHz, CDCl<sub>3</sub>)  $\delta$  7.74 (d, *J* = 7.8 Hz, 1H), 7.70-7.59 (m, 2H), 7.58-7.52 (m, 1H), 7.49-7.41 (m, 2H), 6.98-6.84 (m, 2H), 4.71 (d, *J* = 7.6 Hz, 1H), 4.39 (dd, *J* = 9.4, 7.0 Hz, 1H), 3.96 (dd, *J* = 9.5, 7.7 Hz, 1H), 3.84 (d, *J* = 6.9 Hz, 1H), 3.82 (s, 3H), 2.71 (brs, 1H), 1.57 (s, 9H); **<sup>13</sup>C NMR** (100 MHz, CDCl<sub>3</sub>)  $\delta$  170.8, 159.6, 138.9, 137.3, 134.2, 131.4, 130.0, 128.4, 127.2, 122.1, 114.4, 83.1, 70.4, 67.3, 63.0, 55.5, 50.2, 28.2; **HRMS** (ESI, *m/z*) calcd for C<sub>22</sub>H<sub>25</sub>NO<sub>5</sub>S [M+H]<sup>+</sup>: 416.1526, found: 416.1532; **HPLC** (Chiralpak AD-H, *n*-hexane/*i*-propanol = 70/30, 0.8 mL/min, 220 nm) *t*<sub>R</sub> = 17.66 min, 19.97 min, 25.67 min (minor diastereomer), 28.17 min (minor diastereomer).

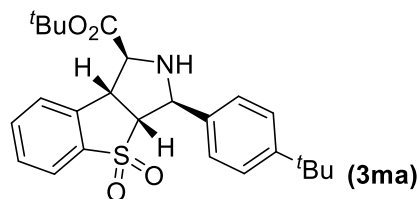

#### **<sup>t</sup>Butyl**

#### **(1S,3S,3aR,8bR)-3-(4-(tert-butyl)phenyl)-2,3,3a,8b-tetrahydro-1H-benzo[4,5]thieno[2,3-c]pyrrole-1-carboxylate 4,4-dioxide**

White solid, yield: 79.4 mg, 90%; m.p.: 158-159 °C;  $[\alpha]_{\text{D}}^{25} = -20.2$  (*c* 1.06, CH<sub>2</sub>Cl<sub>2</sub>); **<sup>1</sup>H NMR** (400 MHz, CDCl<sub>3</sub>)  $\delta$  7.75 (d, *J* = 7.8 Hz, 1H), 7.69-7.60 (m, 2H), 7.58-7.52 (m, 1H), 7.49-7.40 (m, 4H), 4.77 (d, *J* = 7.4 Hz, 1H), 4.40 (dd, *J* = 9.5, 7.1 Hz, 1H), 4.01 (dd, *J* = 9.5, 7.5 Hz, 1H), 3.85 (d, *J* = 7.0 Hz, 1H), 2.74 (brs, 1H), 1.56 (s, 9H), 1.33 (s, 9H); **<sup>13</sup>C NMR** (100 MHz, CDCl<sub>3</sub>)  $\delta$  170.8, 151.3, 138.9, 137.3, 136.4, 134.2, 130.0, 127.2, 126.9, 126.0, 122.1, 83.1, 70.4, 67.4, 63.1, 50.3, 34.7, 31.5, 28.2; **HRMS** (ESI, *m/z*) calcd for C<sub>25</sub>H<sub>31</sub>NO<sub>4</sub>S [M+H]<sup>+</sup>: 442.2047, found: 442.2052; **HPLC** (Chiralpak AS-H, *n*-hexane/EtOH = 90/10, 1.0 mL/min, 220 nm) *t*<sub>R</sub> = 13.56 min, 35.64 min.

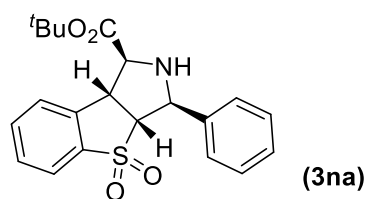

**<sup>t</sup>Butyl**

**(1S,3S,3aR,8bR)-3-phenyl-2,3,3a,8b-tetrahydro-1H-benzo[4,5]thieno[2,3-c]pyrrole-1-carboxylate 4,4-dioxide**

White solid, yield: 76.2 mg, 99%; m.p.: 142-143 °C;  $[\alpha]_D^{25} = -1.5$  (*c* 0.95, CH<sub>2</sub>Cl<sub>2</sub>); **<sup>1</sup>H NMR** (400 MHz, CDCl<sub>3</sub>) δ 7.75 (d, *J* = 7.8 Hz, 1H), 7.70-7.59 (m, 2H), 7.59-7.51 (m, 3H), 7.44-7.37 (m, 2H), 7.36-7.30 (m, 1H), 4.80 (d, *J* = 7.2 Hz, 1H), 4.40 (dd, *J* = 9.4, 7.0 Hz, 1H), 4.00 (dd, *J* = 9.5, 7.3 Hz, 1H), 3.86 (d, *J* = 6.9 Hz, 1H), 2.76 (brs, 1H), 1.57 (s, 9H); **<sup>13</sup>C NMR** (100 MHz, CDCl<sub>3</sub>) δ 170.7, 139.5, 138.8, 137.2, 134.2, 130.0, 129.0, 128.4, 127.2, 127.2, 122.1, 83.1, 70.5, 67.3, 63.3, 50.1, 28.2; **HRMS** (ESI, *m/z*) calcd for C<sub>21</sub>H<sub>23</sub>NO<sub>4</sub>S [M+H]<sup>+</sup>: 386.1421, found: 386.1426; **HPLC** (Chiralpak AS-H, *n*-hexane/EtOH = 90/10, 1.0 mL/min, 220 nm) *t<sub>R</sub>* = 18.69 min, 22.48 min (minor diastereomer), 24.68 min (minor diastereomer), 49.48 min.

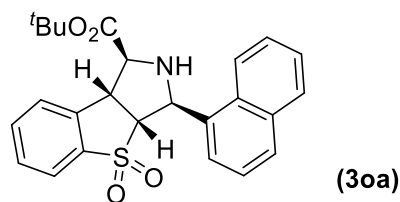

**<sup>t</sup>Butyl**

**(1S,3S,3aR,8bR)-3-(naphthalen-1-yl)-2,3,3a,8b-tetrahydro-1H-benzo[4,5]thieno[2,3-c]pyrrole-1-carboxylate 4,4-dioxide**

White solid, yield: 80.9 mg, 93%; m.p.: 154-156 °C;  $[\alpha]_D^{25} = +20.1$  (*c* 1.00, CH<sub>2</sub>Cl<sub>2</sub>); **<sup>1</sup>H NMR** (400 MHz, CDCl<sub>3</sub>) δ 8.34 (d, *J* = 8.4 Hz, 1H), 7.93-7.81 (m, 3H), 7.77 (d, *J* = 7.8 Hz, 1H), 7.71-7.46 (m, 6H), 5.64 (d, *J* = 5.4 Hz, 1H), 4.48 (dd, *J* = 9.0, 7.4 Hz, 1H), 4.30 (dd, *J* = 9.1, 5.5 Hz, 1H), 3.98 (d, *J* = 7.3 Hz, 1H), 2.92 (brs, 1H), 1.53 (s, 9H); **<sup>13</sup>C NMR** (100 MHz, CDCl<sub>3</sub>) δ 170.9, 138.5, 137.2, 135.4, 134.2, 134.1, 131.2, 130.0, 129.1, 129.0, 127.5, 126.8, 126.1, 125.4, 124.5, 123.5, 122.1, 82.8, 70.2, 67.6, 59.1, 49.2, 28.2; **HRMS** (ESI, *m/z*) calcd for C<sub>25</sub>H<sub>25</sub>NO<sub>4</sub>S [M+H]<sup>+</sup>: 436.1577, found: 436.1583; **HPLC** (Chiralpak AS-H, *n*-hexane/EtOH = 90/10, 1.2 mL/min, 220 nm) *t<sub>R</sub>* = 15.46 min, 41.03 min.

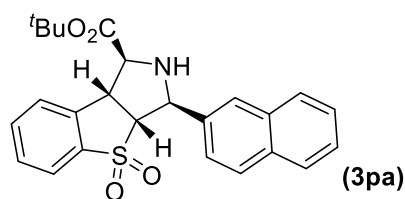

**<sup>t</sup>Butyl**

**(1S,3S,3aR,8bR)-3-(naphthalen-2-yl)-2,3,3a,8b-tetrahydro-1H-benzo[4,5]thieno[2,3-c]pyrrole-1-carboxylate 4,4-dioxide**

White solid, yield: 82.6 mg, 95%; m.p.: 151-153 °C;  $[\alpha]_D^{25} = -15.6$  (*c* 1.10, CH<sub>2</sub>Cl<sub>2</sub>); **<sup>1</sup>H NMR** (400 MHz, CDCl<sub>3</sub>) δ 8.01 (s, 1H), 7.92-7.82 (m, 3H), 7.77 (d, *J* = 7.7 Hz, 1H), 7.71-7.62 (m, 3H), 7.60-7.54 (m, 1H), 7.53-7.45 (m, 2H), 4.99 (d, *J* = 7.2 Hz, 1H), 4.46 (dd, *J* = 9.5, 7.1 Hz, 1H), 4.10 (dd, *J* = 9.5, 7.2 Hz, 1H), 3.92 (d, *J* = 7.0 Hz, 1H), 2.88 (brs, 1H), 1.58 (s, 9H); **<sup>13</sup>C NMR** (100 MHz, CDCl<sub>3</sub>) δ 170.7, 138.9, 137.2, 136.9, 134.3, 133.4, 133.3, 130.1, 129.0, 128.2, 127.8, 127.3, 126.5, 126.4, 126.2, 124.9, 122.1, 83.1, 70.5, 67.3, 63.3, 50.0, 28.2; **HRMS** (ESI, *m/z*) calcd for C<sub>25</sub>H<sub>25</sub>NO<sub>4</sub>S [M+H]<sup>+</sup>: 436.1577, found: 436.1583; **HPLC** (Chiralpak AD-H, *n*-hexane/*i*-propanol = 80/20, 0.8 mL/min, 220 nm) *t<sub>R</sub>* = 32.00 min, 34.45 min, 38.18 min (minor diastereomer), 40.56 min (minor diastereomer).

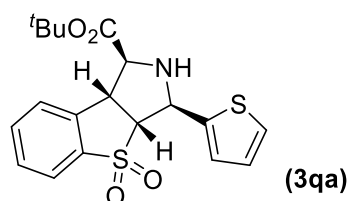

**<sup>t</sup>Butyl**

**(1S,3R,3aR,8bR)-3-(thiophen-2-yl)-2,3,3a,8b-tetrahydro-1H-benzo[4,5]thieno[2,3-c]pyrrole-1-carboxylate 4,4-dioxide**

White solid, yield: 68.0 mg, 87%; m.p.: 151-154 °C;  $[\alpha]_D^{25} = -30.4$  (*c* 0.98, CH<sub>2</sub>Cl<sub>2</sub>); **<sup>1</sup>H NMR** (400 MHz, CDCl<sub>3</sub>) δ 7.75 (d, *J* = 7.8 Hz, 1H), 7.70-7.60 (m, 2H), 7.59-7.53 (m, 1H), 7.31-7.25 (m, 1H), 7.21-7.16 (m, 1H), 7.02 (dd, *J* = 5.1, 3.5 Hz, 1H), 5.02 (brs, 1H), 4.46 (dd, *J* = 9.4, 6.8 Hz, 1H), 4.05 (dd, *J* = 9.4, 7.2 Hz, 1H), 3.85 (d, *J* = 6.7 Hz, 1H), 2.88 (brs, 1H), 1.56 (s, 9H); **<sup>13</sup>C NMR** (100 MHz, CDCl<sub>3</sub>) δ 170.4, 143.1, 138.7, 137.3, 134.4, 130.1, 127.3, 127.2, 125.5, 125.5, 122.1, 83.2, 70.6, 67.4, 59.5, 49.8, 28.2; **HRMS** (ESI, *m/z*) calcd for C<sub>19</sub>H<sub>21</sub>NO<sub>4</sub>S<sub>2</sub> [M+H]<sup>+</sup>: 392.0985, found: 392.0990; **HPLC** (Chiralpak AS-H, *n*-hexane/EtOH = 90/10, 1.0 mL/min, 220 nm) *t<sub>R</sub>* = 27.38 min, 31.36 min (minor diastereomer), 34.00 min (minor diastereomer), 52.75 min.

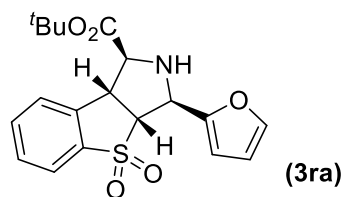

**<sup>t</sup>Butyl**

**(1S,3S,3aR,8bR)-3-(furan-2-yl)-2,3,3a,8b-tetrahydro-1H-benzo[4,5]thieno[2,3-c]pyrrole-1-carboxylate 4,4-dioxide**

White solid, yield: 54.0 mg, 72%; m.p.: 163-165 °C;  $[\alpha]_D^{25} = -22.7$  (*c* 1.13, CH<sub>2</sub>Cl<sub>2</sub>); **<sup>1</sup>H NMR** (400 MHz, CDCl<sub>3</sub>) δ 7.74 (d, *J* = 7.7 Hz, 1H), 7.70-7.63 (m, 1H), 7.62-7.52 (m, 2H), 7.44-7.40 (m, 1H), 6.43-6.35 (m, 2H), 4.87 (d, *J* = 6.0 Hz, 1H), 4.50 (dd, *J* = 9.3, 5.8 Hz, 1H), 4.18 (dd, *J* = 9.3, 6.0 Hz, 1H), 3.81 (d, *J* = 5.9 Hz, 1H), 2.88 (brs, 1H) 1.54 (s, 9H); **<sup>13</sup>C NMR** (100 MHz, CDCl<sub>3</sub>) δ 170.7, 151.7, 142.9, 138.6, 137.6, 134.4, 130.0, 127.1, 122.0, 110.8, 108.2, 83.1, 67.8, 67.6, 57.6, 50.1, 28.2; **HRMS** (ESI, *m/z*) calcd for C<sub>19</sub>H<sub>21</sub>NO<sub>5</sub>S [M+H]<sup>+</sup>: 376.1213, found: 376.1218; **HPLC** (Chiralpak AS-H, *n*-hexane/EtOH = 90/10, 1.0 mL/min, 220 nm) *t<sub>R</sub>* = 29.06 min, 50.07 min.

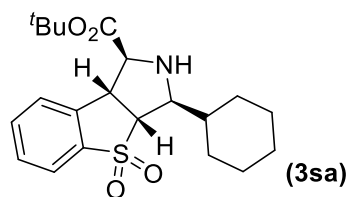

**<sup>t</sup>Butyl**

**(1S,3S,3aR,8bR)-3-cyclohexyl-2,3,3a,8b-tetrahydro-1H-benzo[4,5]thieno[2,3-c]pyrrole-1-carboxylate 4,4-dioxide**

White solid, yield: 66.5 mg, 85%; m.p.: 156-158 °C;  $[\alpha]_D^{25} = -16.0$  (*c* 1.17, CH<sub>2</sub>Cl<sub>2</sub>); **<sup>1</sup>H NMR** (400 MHz, CDCl<sub>3</sub>) δ 7.74-7.70 (m, 1H), 7.64-7.59 (m, 1H), 7.53 (m, 2H), 4.17 (dd, *J* = 9.7, 7.8 Hz, 1H), 3.74 (dd, *J* = 9.7, 6.6 Hz, 1H), 3.63 (d, *J* = 7.8 Hz, 1H), 3.55 (dd, *J* = 7.9, 6.6 Hz, 1H), 2.43 (brs, 1H), 1.98 (d, *J* = 12.4 Hz, 1H), 1.90-1.78 (m, 3H), 1.74-1.62 (m, 2H), 1.55 (s, 9H), 1.33-1.09 (m, 5H); **<sup>13</sup>C NMR** (100 MHz, CDCl<sub>3</sub>) δ 171.0, 139.2, 136.7, 133.9, 129.9, 127.2, 122.0, 83.0, 67.7, 67.2, 65.2, 50.7, 42.1, 30.5, 30.0, 28.2, 26.4, 26.2, 26.0; **HRMS** (ESI, *m/z*) calcd for C<sub>21</sub>H<sub>29</sub>NO<sub>4</sub>S [M+H]<sup>+</sup>: 392.1890, found: 392.1895; **HPLC** (Chiralpak AD-H, *n*-hexane/*i*-propanol = 80/20, 0.8 mL/min, 220 nm) *t<sub>R</sub>* = 15.91 min, 16.97 min.

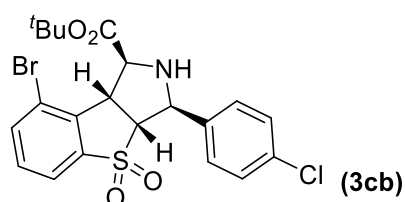

**<sup>t</sup>Butyl**

**(1*S*,3*S*,3*aR*,8*bR*)-8-bromo-3-(4-chlorophenyl)-2,3,3*a*,8*b*-tetrahydro-1*H*-benzo[4,5]thieno[2,3-*c*]pyrrole-1-carboxylate 4,4-dioxide**

White solid, yield: 82.5 mg, 83%; m.p.: 167-170 °C;  $[\alpha]_D^{25} = -35.1$  (*c* 0.90, CH<sub>2</sub>Cl<sub>2</sub>); **<sup>1</sup>H NMR** (400 MHz, CDCl<sub>3</sub>)  $\delta$  7.75 (d, *J* = 7.4 Hz, 1H), 7.69 (dd, *J* = 7.9, 0.9 Hz, 1H), 7.40 (t, *J* = 7.8 Hz, 1H), 7.36-7.29 (m, 4H), 4.60 (d, *J* = 3.0 Hz, 1H), 4.44 (dd, *J* = 8.3, 3.0 Hz, 1H), 4.27 (d, *J* = 8.0 Hz, 1H), 4.18 (t, *J* = 8.2 Hz, 1H), 2.84 (brs, 1H), 1.50 (s, 9H); **<sup>13</sup>C NMR** (100 MHz, CDCl<sub>3</sub>)  $\delta$  170.5, 140.4, 138.6, 137.8, 135.9, 134.3, 131.5, 129.3, 129.0, 122.5, 121.4, 83.1, 69.0, 68.6, 59.0, 53.1, 28.1; **HRMS** (ESI, *m/z*) calcd for C<sub>21</sub>H<sub>21</sub>BrClNO<sub>4</sub>S [M+H]<sup>+</sup>: 498.0136, found: 498.0141; **HPLC** (Chiralpak AD-H, *n*-hexane/*i*-propanol = 80/20, 0.8 mL/min, 220 nm) *t<sub>R</sub>* = 16.76 min, 17.96 min, 21.60 min (minor diastereomer), 22.83 min (minor diastereomer).

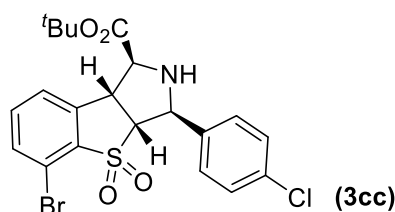

**<sup>t</sup>Butyl**

**(1*S*,3*S*,3*aR*,8*bR*)-5-bromo-3-(4-chlorophenyl)-2,3,3*a*,8*b*-tetrahydro-1*H*-benzo[4,5]thieno[2,3-*c*]pyrrole-1-carboxylate 4,4-dioxide**

White solid, yield: 91.4 mg, 92%; m.p.: 208-210 °C;  $[\alpha]_D^{25} = -6.6$  (*c* 1.01, CH<sub>2</sub>Cl<sub>2</sub>); **<sup>1</sup>H NMR** (400 MHz, CDCl<sub>3</sub>)  $\delta$  7.67 (d, *J* = 7.8 Hz, 1H), 7.59 (d, *J* = 7.8 Hz, 1H), 7.55-7.45 (m, 3H), 7.41-7.34 (m, 2H), 4.82 (d, *J* = 7.4 Hz, 1H), 4.35 (dd, *J* = 9.7, 7.2 Hz, 1H), 3.94 (dd, *J* = 9.7, 7.4 Hz, 1H), 3.82 (d, *J* = 7.1 Hz, 1H), 2.74 (brs, 1H), 1.56 (s, 9H); **<sup>13</sup>C NMR** (100 MHz, CDCl<sub>3</sub>)  $\delta$  170.3, 140.3, 138.0, 137.9, 135.1, 134.3, 134.3, 129.2, 128.6, 126.2, 116.8, 83.4, 71.0, 67.2, 62.8, 48.1, 28.2; **HRMS** (ESI, *m/z*) calcd for C<sub>21</sub>H<sub>21</sub>BrClNO<sub>4</sub>S [M+H]<sup>+</sup>: 498.0136, found: 498.0141; **HPLC** (Chiralpak AD-H, *n*-hexane/*i*-propanol = 80/20, 0.8 mL/min, 220 nm) *t<sub>R</sub>* = 22.82 min, 29.49 min.

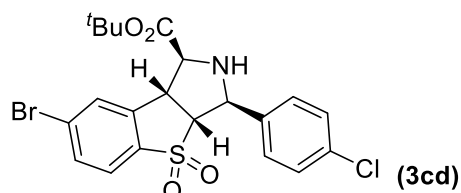

**<sup>t</sup>Butyl**

**(1*S*,3*S*,3*aR*,8*bR*)-7-bromo-3-(4-chlorophenyl)-2,3,3*a*,8*b*-tetrahydro-1*H*-benzo[4,5]thieno[2,3-*c*]pyrrole-1-carboxylate 4,4-dioxide**

White solid, yield: 93.4 mg, 94%; m.p.: 140-143 °C;  $[\alpha]_D^{25} = -16.7$  (*c* 0.98, CH<sub>2</sub>Cl<sub>2</sub>); **<sup>1</sup>H NMR**

(400 MHz, CDCl<sub>3</sub>)  $\delta$  7.84 (s, 1H), 7.69 (dd,  $J$  = 8.3, 1.2 Hz, 1H), 7.61 (d,  $J$  = 8.3 Hz, 1H), 7.49 (d,  $J$  = 8.4 Hz, 2H), 7.37 (d,  $J$  = 8.4 Hz, 2H), 4.77 (t,  $J$  = 7.3 Hz, 1H), 4.34 (dd,  $J$  = 9.4, 7.4 Hz, 1H), 3.92 (dd,  $J$  = 9.5, 7.4 Hz, 1H), 3.84 (t,  $J$  = 7.3 Hz, 1H), 2.76-2.68 (m, 1H), 1.59 (s, 9H); <sup>13</sup>C NMR (100 MHz, CDCl<sub>3</sub>)  $\delta$  170.2, 139.0, 137.9, 137.8, 134.3, 133.5, 130.7, 129.2, 129.0, 128.5, 123.5, 83.6, 70.6, 66.9, 62.4, 49.2, 28.3; **HRMS** (ESI,  $m/z$ ) calcd for C<sub>21</sub>H<sub>21</sub>BrClNO<sub>4</sub>S [M+H]<sup>+</sup>: 498.0136, found: 498.0141; **HPLC** (Chiralpak AD-H, *n*-hexane/*i*-propanol = 80/20, 0.8 mL/min, 220 nm)  $t_R$  = 28.15 min, 30.49 min.

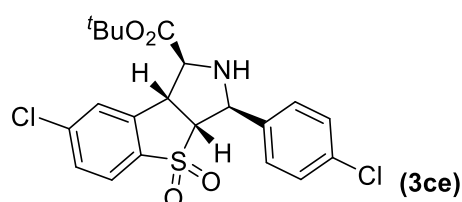

#### **<sup>t</sup>Butyl**

#### **(1S,3S,3aR,8bR)-7-chloro-3-(4-chlorophenyl)-2,3,3a,8b-tetrahydro-1H-benzo[4,5]thieno[2,3-c]pyrrole-1-carboxylate 4,4-dioxide**

White solid, yield: 77.1 mg, 85%; m.p.: 126-128 °C; [ $\alpha$ ]<sub>D</sub><sup>25</sup> = -13.4 (*c* 0.91, CH<sub>2</sub>Cl<sub>2</sub>); <sup>1</sup>H NMR (400 MHz, CDCl<sub>3</sub>)  $\delta$  7.68 (d,  $J$  = 8.5 Hz, 2H), 7.56-7.46 (m, 3H), 7.40-7.34 (m, 2H), 4.77 (t,  $J$  = 7.5 Hz, 1H), 4.34 (dd,  $J$  = 9.5, 7.2 Hz, 1H), 3.93 (dd,  $J$  = 9.6, 7.5 Hz, 1H), 3.84 (t,  $J$  = 7.2 Hz, 1H), 2.76-2.67 (m, 1H), 1.59 (s, 9H); <sup>13</sup>C NMR (100 MHz, CDCl<sub>3</sub>)  $\delta$  170.2, 140.7, 139.0, 137.9, 137.3, 134.3, 130.7, 129.2, 128.5, 127.7, 123.4, 83.5, 70.7, 66.8, 62.4, 49.2, 28.2; **HRMS** (ESI,  $m/z$ ) calcd for C<sub>21</sub>H<sub>21</sub>Cl<sub>2</sub>NO<sub>4</sub>S [M+H]<sup>+</sup>: 454.0641, found: 454.0647; **HPLC** (Chiralpak AS-H, *n*-hexane/EtOH = 90/10, 1.0 mL/min, 220 nm)  $t_R$  = 16.78 min, 42.65 min.

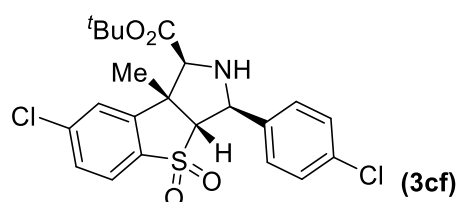

#### **<sup>t</sup>Butyl**

#### **(1S,3S,3aR,8bR)-7-chloro-3-(4-chlorophenyl)-8b-methyl-2,3,3a,8b-tetrahydro-1H-benzo[4,5]thieno[2,3-c]pyrrole-1-carboxylate 4,4-dioxide**

White solid, yield: 79.4 mg, 85%; m.p.: 149-152 °C; [ $\alpha$ ]<sub>D</sub><sup>25</sup> = -14.4 (*c* 1.00, CH<sub>2</sub>Cl<sub>2</sub>); <sup>1</sup>H NMR (400 MHz, CDCl<sub>3</sub>)  $\delta$  7.77 (d,  $J$  = 1.8 Hz, 1H), 7.66 (d,  $J$  = 8.3 Hz, 1H), 7.56-7.48 (m, 3H), 7.41-7.35 (m, 2H), 4.71 (brs, 1H), 3.91 (brs, 1H), 3.50 (d,  $J$  = 7.7 Hz, 1H), 2.74 (brs, 1H), 1.65 (s, 3H), 1.61 (s, 9H); <sup>13</sup>C NMR (100 MHz, CDCl<sub>3</sub>)  $\delta$  168.8, 144.1, 140.7, 137.8, 136.6, 134.3, 130.6,

129.2, 128.5, 126.9, 123.3, 83.7, 78.1, 69.6, 61.0, 55.6, 28.3, 24.0; **HRMS** (ESI, *m/z*) calcd for C<sub>22</sub>H<sub>23</sub>Cl<sub>2</sub>NO<sub>4</sub>S [M+H]<sup>+</sup>: 468.0798, found: 468.0803; **HPLC** (Chiralpak AD-H, *n*-hexane/*i*-propanol = 80/20, 0.8 mL/min, 220 nm) t<sub>R</sub> = 17.61 min, 20.11 min.

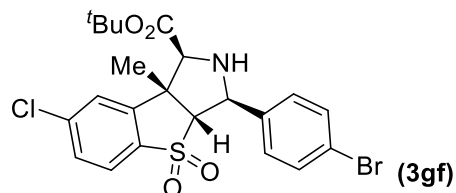

**Butyl**

**(1S,3S,3aR,8bR)-3-(4-bromophenyl)-7-chloro-8b-methyl-2,3,3a,8b-tetrahydro-1H-benzo[4,5]thieno[2,3-*c*]pyrrole-1-carboxylate 4,4-dioxide**

White solid, yield: 87.9 mg, 86%; m.p.: 140-141 °C; [α]<sub>D</sub><sup>25</sup> = -15.2 (*c* 0.90, CH<sub>2</sub>Cl<sub>2</sub>); **<sup>1</sup>H NMR** (400 MHz, CDCl<sub>3</sub>) δ 7.77 (d, *J* = 1.6 Hz, 1H), 7.66 (d, *J* = 8.3 Hz, 1H), 7.58-7.51 (m, 3H), 7.45 (d, *J* = 8.3 Hz, 2H), 4.74-4.65 (m, 1H), 3.91 (d, *J* = 5.7 Hz, 1H), 3.49 (d, *J* = 7.7 Hz, 1H), 2.74 (brs, 1H), 1.64 (s, 3H), 1.61 (s, 9H); **<sup>13</sup>C NMR** (100 MHz, CDCl<sub>3</sub>) δ 168.8, 144.1, 140.7, 138.3, 136.5, 132.2, 130.6, 128.8, 126.9, 123.3, 122.4, 83.7, 78.0, 69.6, 61.0, 55.6, 28.3, 24.0; **HRMS** (ESI, *m/z*) calcd for C<sub>22</sub>H<sub>23</sub>BrClNO<sub>4</sub>S [M+H]<sup>+</sup>: 512.0292, found: 512.0298; **HPLC** (Chiralpak AD-H, *n*-hexane/*i*-propanol = 80/20, 0.8 mL/min, 220 nm) t<sub>R</sub> = 20.49 min, 24.37 min.

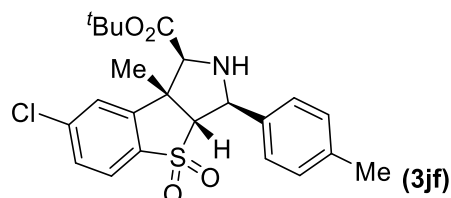

**Butyl**

**(1S,3S,3aR,8bR)-7-chloro-8b-methyl-3-(*p*-tolyl)-2,3,3a,8b-tetrahydro-1H-benzo[4,5]thieno[2,3-*c*]pyrrole-1-carboxylate 4,4-dioxide**

White solid, yield: 76.0 mg, 85%; m.p.: 145-147 °C; [α]<sub>D</sub><sup>25</sup> = -5.4 (*c* 1.08, CH<sub>2</sub>Cl<sub>2</sub>); **<sup>1</sup>H NMR** (400 MHz, CDCl<sub>3</sub>) δ 7.76 (d, *J* = 1.8 Hz, 1H), 7.66 (d, *J* = 8.4 Hz, 1H), 7.52 (dd, *J* = 8.3, 1.8 Hz, 1H), 7.42 (d, *J* = 8.2 Hz, 2H), 7.22 (d, *J* = 8.1 Hz, 2H), 4.74-4.66 (m, 1H), 3.89 (d, *J* = 8.2 Hz, 1H), 3.56 (d, *J* = 7.8 Hz, 1H), 2.85-2.78 (m, 1H), 2.37 (s, 3H), 1.65 (s, 3H), 1.61 (s, 9H); **<sup>13</sup>C NMR** (100 MHz, CDCl<sub>3</sub>) δ 168.9, 144.3, 140.6, 138.2, 136.8, 136.0, 130.5, 129.8, 126.9, 126.8, 123.2, 83.6, 78.2, 69.9, 61.7, 56.2, 28.3, 24.0, 21.3; **HRMS** (ESI, *m/z*) calcd for C<sub>23</sub>H<sub>26</sub>ClNO<sub>4</sub>S [M+H]<sup>+</sup>: 448.1344, found: 448.1349; **HPLC** (Chiralpak AD-H, *n*-hexane/*i*-propanol = 80/20, 0.8 mL/min, 220 nm) t<sub>R</sub> = 14.09 min, 17.68 min.

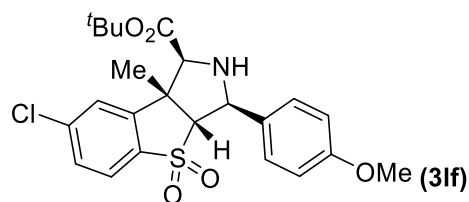

#### **<sup>t</sup>Butyl**

#### **(1S,3S,3aR,8bR)-7-chloro-3-(4-methoxyphenyl)-8b-methyl-2,3,3a,8b-tetrahydro-1H-benzo[4,5]thieno[2,3-c]pyrrole-1-carboxylate 4,4-dioxide**

White solid, yield: 86.1 mg, 93%; m.p.: 167-168 °C;  $[\alpha]_D^{25} = -11.4$  (*c* 1.06, CH<sub>2</sub>Cl<sub>2</sub>); **<sup>1</sup>H NMR** (400 MHz, CDCl<sub>3</sub>) δ 7.76 (d, *J* = 1.8 Hz, 1H), 7.65 (d, *J* = 8.3 Hz, 1H), 7.53 (dd, *J* = 8.3, 1.8 Hz, 1H), 7.45 (d, *J* = 8.7 Hz, 2H), 6.94 (d, *J* = 8.7 Hz, 2H), 4.70-4.62 (m, 1H), 3.89 (d, *J* = 8.7 Hz, 1H), 3.82 (s, 3H), 3.53 (d, *J* = 8.0 Hz, 1H), 2.81-2.73 (m, 1H), 1.65 (s, 3H), 1.61 (s, 9H); **<sup>13</sup>C NMR** (100 MHz, CDCl<sub>3</sub>) δ 168.9, 159.7, 144.4, 140.6, 136.8, 130.9, 130.5, 128.3, 126.8, 123.2, 114.4, 83.6, 78.2, 69.9, 61.6, 56.1, 55.5, 28.3, 24.1; **HRMS** (ESI, *m/z*) calcd for C<sub>23</sub>H<sub>26</sub>ClNO<sub>5</sub>S [M+H]<sup>+</sup>: 464.1293, found: 464.1298; **HPLC** (Chiralpak AD-H, *n*-hexane/*i*-propanol = 80/20, 0.8 mL/min, 220 nm) *t<sub>R</sub>* = 19.66 min, 25.39 min.

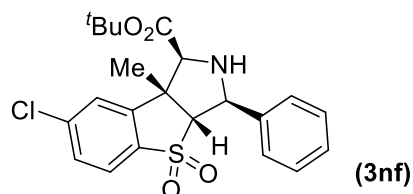

#### **<sup>t</sup>Butyl**

#### **(1S,3S,3aR,8bR)-7-chloro-8b-methyl-3-phenyl-2,3,3a,8b-tetrahydro-1H-benzo[4,5]thieno[2,3-c]pyrrole-1-carboxylate 4,4-dioxide**

White solid, yield: 82.3 mg, 95%; m.p.: 179-182 °C;  $[\alpha]_D^{25} = -11.7$  (*c* 0.89, CH<sub>2</sub>Cl<sub>2</sub>); **<sup>1</sup>H NMR** (400 MHz, CDCl<sub>3</sub>) δ 7.77 (d, *J* = 1.7 Hz, 1H), 7.66 (d, *J* = 8.3 Hz, 1H), 7.59-7.49 (m, 3H), 7.46-7.39 (m, 2H), 7.38-7.30 (m, 1H), 4.75 (dd, *J* = 9.6, 7.7 Hz, 1H), 3.91 (d, *J* = 9.5 Hz, 1H), 3.58 (d, *J* = 7.7 Hz, 1H), 2.83 (t, *J* = 9.6 Hz, 1H), 1.65 (s, 3H), 1.61 (s, 9H); **<sup>13</sup>C NMR** (100 MHz, CDCl<sub>3</sub>) δ 168.8, 144.2, 140.6, 139.1, 136.7, 130.5, 129.1, 128.4, 127.0, 126.8, 123.2, 83.6, 78.2, 69.9, 61.8, 56.0, 28.3, 24.0; **HRMS** (ESI, *m/z*) calcd for C<sub>22</sub>H<sub>24</sub>ClNO<sub>4</sub>S [M+H]<sup>+</sup>: 434.1187, found: 434.1193; **HPLC** (Chiralpak AS-H, *n*-hexane/EtOH = 90/10, 1.0 mL/min, 220 nm) *t<sub>R</sub>* = 11.27 min, 14.00 min.

## **4. Gram scale procedure for the 1,3-dipolar cycloaddition of 1c to 2a**



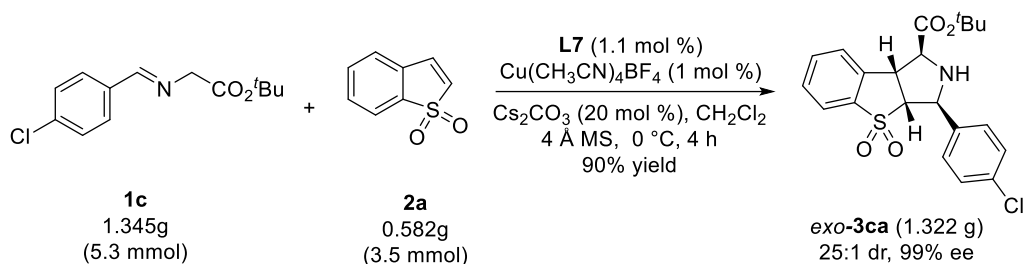

Under a nitrogen atmosphere, Cu(CH<sub>3</sub>CN)<sub>4</sub>BF<sub>4</sub> (11.0 mg, 0.035 mmol) and **L7** (45.4 mg, 0.0385 mmol) were dissolved in CH<sub>2</sub>Cl<sub>2</sub> (40 mL), and stirred at room temperature for about 1 h. Then, glycine imine **1c** (1.345 g, 5.3 mmol) and Cs<sub>2</sub>CO<sub>3</sub> (228 mg, 0.7 mmol) were added, the mixture was cooled to 0 °C and benzo[*b*]thiophene 1,1-dioxides **2a** (0.582 g, 3.5 mmol) was added. Once starting material was consumed (monitored by TLC), the mixture was filtered through celite and the filtrate was concentrated, then the residue was purified by column chromatography (petroleum ether/ethyl acetate 6:1) on silica gel to afford the corresponding product **3ca** in 90% yield.

## 5. Transformation of cycloadduct **3ca**<sup>2,3</sup>

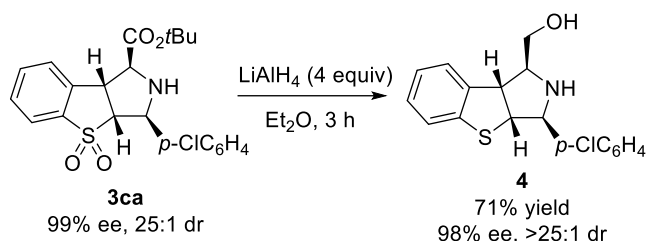

To a solution of **3ca** (251.5 mg, 0.6 mmol) in dry Et<sub>2</sub>O (8 mL) under nitrogen, LiAlH<sub>4</sub> (91.1 mg, 2.4 mmol) was added in small portions. The reaction mixture was stirred for 3 h at room temperature. To which water (0.4 mL) and 10% aqueous sodium hydroxide (0.6 mL) and more water (0.6 mL) carefully. The mixture was filtered over anhydrous Na<sub>2</sub>SO<sub>4</sub>, and the filtrate was concentrated. The residue was purified by column chromatography (petroleum ether/ethyl acetate 2:1) on silica gel to afford **4** in 71% yield.

### ((1*S*,3*S*,3*aR*,8*bR*)-3-(4-Chlorophenyl)-2,3,3*a*,8*b*-tetrahydro-1*H*-benzo[4,5]thieno[2,3-*c*]pyrrol-1-yl)methanol (**4**)

White solid, yield: 135.1 mg, 71%; m.p.: 146-148 °C; [α]<sub>D</sub><sup>25</sup> = -134.4 (*c* 1.00, CH<sub>2</sub>Cl<sub>2</sub>); <sup>1</sup>H NMR (400 MHz, CDCl<sub>3</sub>) δ 7.44 (d, *J* = 8.4 Hz, 2H), 7.33 (d, *J* = 8.4 Hz, 2H), 7.21-7.16 (m, 3H), 7.15-7.05 (m, 1H), 4.16 (d, *J* = 8.6 Hz, 1H), 4.10 (dd, *J* = 9.6, 5.1 Hz, 1H), 3.96 (dd, *J* = 11.0, 3.5 Hz, 1H), 3.88 (dd, *J* = 11.0, 3.8 Hz, 1H), 3.81-3.73 (m, 1H), 3.70-3.63 (m, 1H), 2.21 (brs, 2H); <sup>13</sup>C NMR (100 MHz, CDCl<sub>3</sub>) δ 141.2, 140.1, 139.6, 133.7, 128.8, 128.3, 128.3, 124.9, 124.8, 122.6, 70.3, 66.2, 64.7, 58.9, 54.9; HRMS (ESI, *m/z*) calcd for C<sub>17</sub>H<sub>16</sub>ClNOS [M+H]<sup>+</sup>: 318.0714, found: 318.0719; HPLC (Chiralpak AD-H, *n*-hexane/*i*-propanol = 80/20, 0.8 mL/min, 220 nm) t<sub>R</sub> =

10.00 min, 11.25 min, 17.62 min (minor diastereomer), 20.74 min (minor diastereomer).

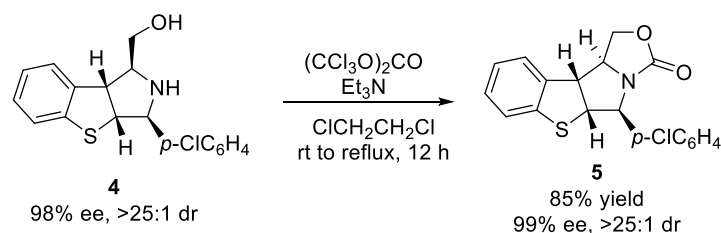

At nitrogen atmosphere, to a solution of compound **4** (0.15 mmol, 47.6 mg) in anhydrous 1,2-dichloroethane (2.0 mL), anhydrous triethylamine (0.225 mmol, 22.8 mg) and triphosgene (0.18 mmol, 53.4 mg) was added. The reaction mixture was stirred at rt for 1 h and refluxed for 12 h. The reaction mixture was cooled to rt and added 5 mL CH<sub>2</sub>Cl<sub>2</sub>, then pour into silica gel stirred for 4 h. The mixture was filtered over anhydrous Na<sub>2</sub>SO<sub>4</sub> and evaporated under vacuum, the residue was subjected to the preparative thin layer chromatography (petroleum ether/ethyl acetate 3:1) to afford the title compound **5** in 85% yield.

**(5*S*,5*aR*,10*bR*,10*cS*)-5-(4-Chlorophenyl)-5,5*a*,10*b*,10*c*-tetrahydro-1*H*,3*H*-benzo[4',5']thieno[3',2':3,4]pyrrolo[1,2-*c*]oxazol-3-one (**5**)**

White solid, yield: 43.7 mg, 85%; m.p.: 200-201 °C;  $[\alpha]_D^{25} = -136.5$  (*c* 1.15, CH<sub>2</sub>Cl<sub>2</sub>); **<sup>1</sup>H NMR** (400 MHz, CDCl<sub>3</sub>) δ 7.37 (d, *J* = 8.4 Hz, 2H), 7.32-7.15 (m, 4H), 7.16-7.07 (m, 2H), 4.72-4.63 (m, 2H), 4.59 (dd, *J* = 8.7, 5.5 Hz, 1H), 4.55-4.47 (m, 1H), 4.40 (dd, *J* = 8.6, 7.1 Hz, 1H), 4.05 (dd, *J* = 8.4, 7.0 Hz, 1H); **<sup>13</sup>C NMR** (100 MHz, CDCl<sub>3</sub>) δ 155.3, 140.3, 137.4, 134.8, 133.4, 129.5, 129.4, 129.1, 125.4, 124.7, 122.9, 68.0, 67.1, 65.8, 61.6, 57.4; **HRMS** (ESI, *m/z*) calcd for C<sub>18</sub>H<sub>14</sub>ClNO<sub>2</sub>S [M+H]<sup>+</sup>: 344.0507, found: 344.0512; **HPLC** (Chiralpak AD-H, *n*-hexane/*i*-propanol = 80/20, 0.8 mL/min, 220 nm) *t*<sub>R</sub> = 26.76 min, 32.61 min.

## 6. The absolute configuration determination of (1*S*,3*S*,3*aR*,8*bR*)-3aa

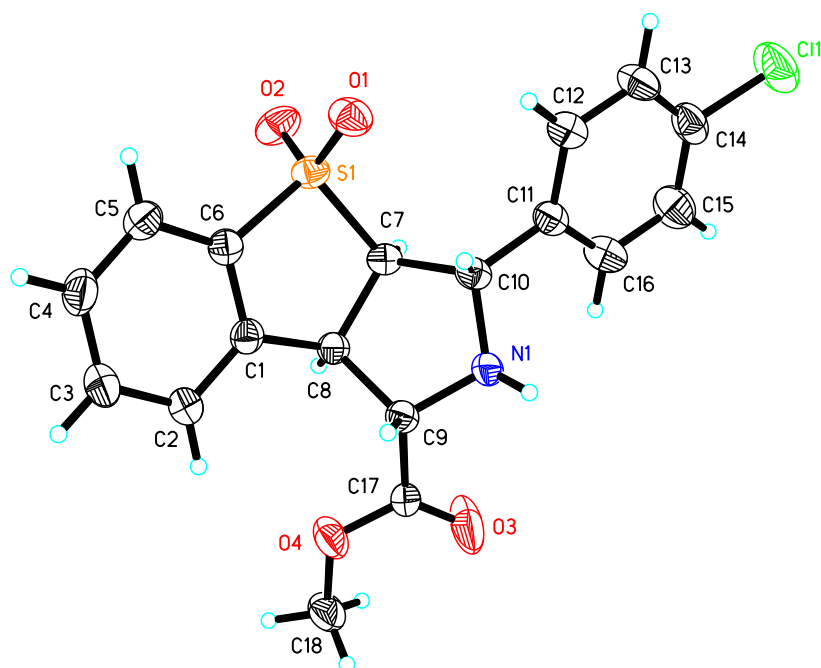

**Fig S1.** X-ray structure of (1*S*,3*S*,3*aR*,8*bR*)-**3aa**

**Crystal data and structure refinement for CCDC 1561030**

(CCDC 1561030 contains the supplementary crystallographic data for this paper. These data can be obtained free of charge via [www.ccdc.cam.ac.uk/conts/retrieving.html](http://www.ccdc.cam.ac.uk/conts/retrieving.html).)

**Table S2.** Crystal data and structure refinement for (1*S*,3*S*,3*aR*,8*bR*)-**3aa**

|                        |                                                       |          |
|------------------------|-------------------------------------------------------|----------|
| Identification code    | cd1561030                                             |          |
| Empirical formula      | C <sub>18</sub> H <sub>16</sub> Cl N O <sub>4</sub> S |          |
| Formula weight         | 377.83                                                |          |
| Temperature            | 293(2) K                                              |          |
| Wavelength             | 0.71073 Å                                             |          |
| Crystal system         | Orthorhombic                                          |          |
| Space group            | P 21 21 21                                            |          |
| Unit cell dimensions   | a = 5.1621(6) Å                                       | α = 90 ° |
|                        | b = 16.3247(18) Å                                     | β = 90 ° |
|                        | c = 20.251(2) Å                                       | γ = 90 ° |
| Volume                 | 1706.5(3) Å <sup>3</sup>                              |          |
| Z                      | 4                                                     |          |
| Density (calculated)   | 1.471 Mg/m <sup>3</sup>                               |          |
| Absorption coefficient | 0.370 mm <sup>-1</sup>                                |          |
| F(000)                 | 784                                                   |          |
| Crystal size           | 0.200 x 0.150 x 0.110 mm <sup>3</sup>                 |          |

|                                   |                                             |
|-----------------------------------|---------------------------------------------|
| Theta range for data collection   | 1.602 to 26.000 °                           |
| Index ranges                      | -6<=h<=6, -20<=k<=14, -24<=l<=24            |
| Reflections collected             | 10224                                       |
| Independent reflections           | 3354 [R(int) = 0.0342]                      |
| Completeness to theta = 25.242 °  | 100.0 %                                     |
| Absorption correction             | Semi-empirical from equivalents             |
| Max. and min. transmission        | 0.7456 and 0.6588                           |
| Refinement method                 | Full-matrix least-squares on F <sup>2</sup> |
| Data / restraints / parameters    | 3354 / 0 / 231                              |
| Goodness-of-fit on F <sup>2</sup> | 1.035                                       |
| Final R indices [I>2sigma(I)]     | R1 = 0.0420, wR2 = 0.1066                   |
| R indices (all data)              | R1 = 0.0476, wR2 = 0.1107                   |
| Absolute structure parameter      | 0.05(4)                                     |
| Extinction coefficient            | n/a                                         |
| Largest diff. peak and hole       | 0.379 and -0.292 e.Å <sup>-3</sup>          |

## 7. References

- (1) (a) Madec, D.; Mingoia, F.; Macovei, C.; Maitro, G.; Giambastiani, G.; Poli, G. *Eur. J. Org. Chem.* **2005**, 3, 552. (b) Zhang, W.; Ma, T.; Li, S.; Yang, Y.; Guo, J.; Yu, W.; Kong, L. *Eur. J. Med. Chem.* **2017**, 125, 538. (c) Antonow, D.; Marrafa, T.; Dawood, I.; Ahmed, T.; Haque, M. R.; Thurston, D. E.; Zinzalla, G. *Chem. Commun.*, **2010**, 46, 2289.
- (2) (a) Nandakumar, M.; Karunakaran, J.; Mohanakrishnan, A. K. *Org. Lett.* **2014**, 16, 3068. (b) He, F.-S.; Jin, J.-H.; Yang, Z.-T.; Yu, X.; Fossey, J. S.; Wei-Ping Deng, W.-P. *ACS Catal.* **2016**, 6, 652.
- (3) Yang, X.; Cheng, F.; Kou, Y.-D.; Pang, S.; Shen, Y.-C.; Huang, Y.-Y.; Shibata, N. *Angew. Chem. Int. Ed.* **2017**, 56, 1510.

## 8. Chiral HPLC Chromatograms

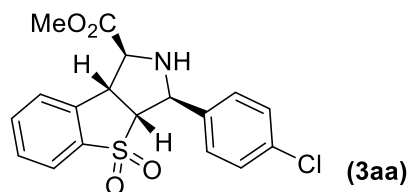

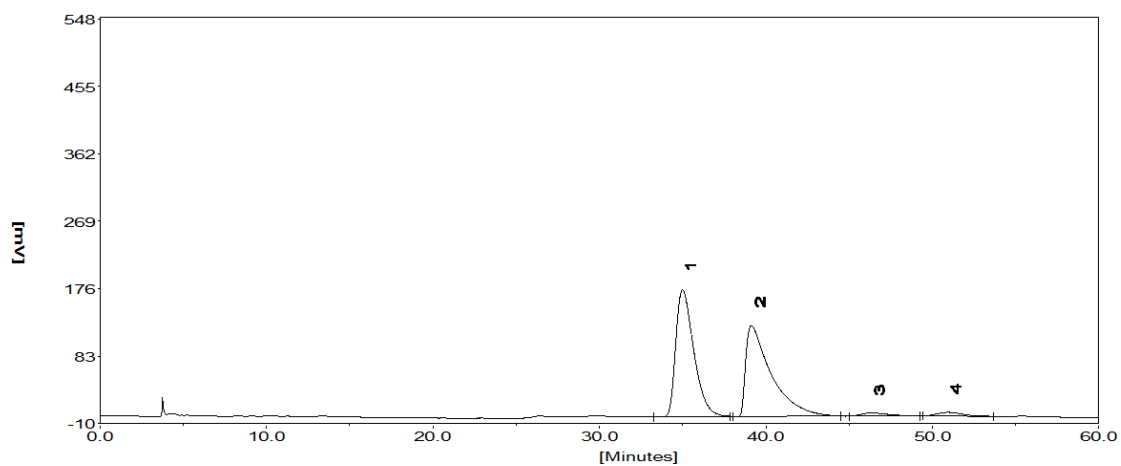

| # | Ret Time (min) | Height (mV) | Area (mV.sec) | Area (%) |
|---|----------------|-------------|---------------|----------|
| 1 | 34.99167       | 175.06      | 13133.77      | 47.9385  |
| 2 | 39.13667       | 125.38      | 13215.14      | 48.2355  |
| 3 | 46.33583       | 4.90        | 530.62        | 1.8908   |
| 4 | 50.92333       | 5.21        | 542.44        | 1.9352   |

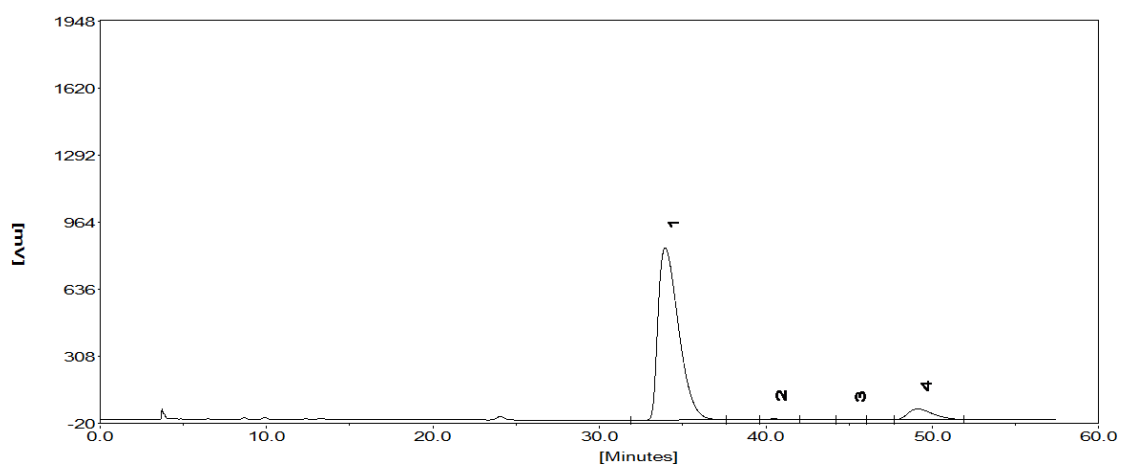

| # | Ret Time (min) | Height (mV) | Area (mV.sec) | Area (%) |
|---|----------------|-------------|---------------|----------|
| 1 | 33.95167       | 842.62      | 71913.79      | 92.6071  |
| 2 | 40.41417       | 3.77        | 291.07        | 0.3748   |
| 3 | 45.15500       | 0.36        | 21.96         | 0.0283   |
| 4 | 49.11417       | 52.13       | 5427.93       | 6.9898   |

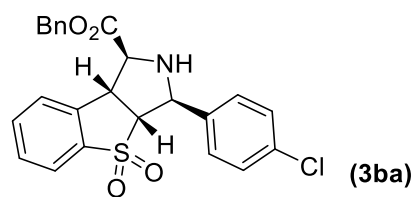

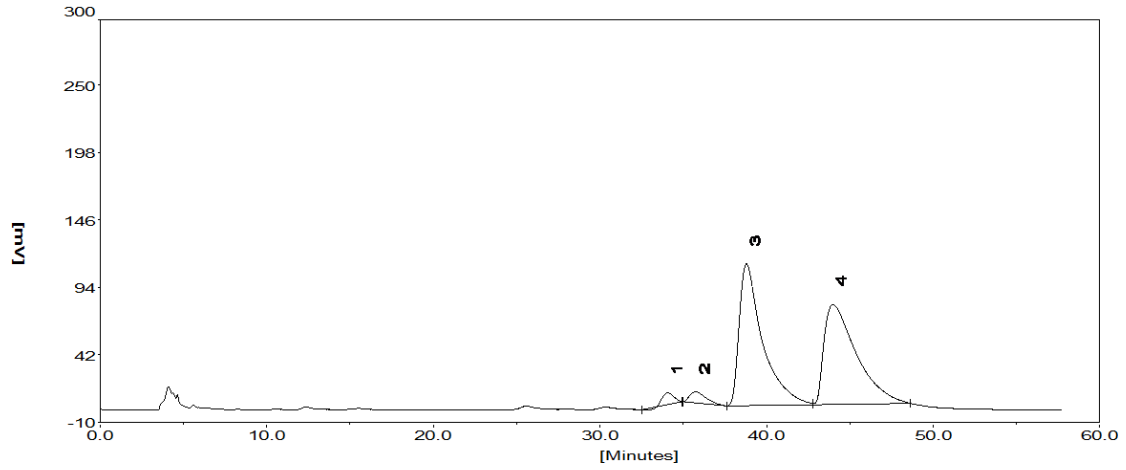

| # | Ret Time (min) | Height (mV) | Area (mV.sec) | Area (%) |
|---|----------------|-------------|---------------|----------|
| 1 | 34.08917       | 8.97        | 400.00        | 1.8174   |
| 2 | 35.76833       | 8.59        | 583.67        | 2.6518   |
| 3 | 38.80250       | 109.27      | 10637.58      | 48.3304  |
| 4 | 42.79583       | 77.00       | 10388.87      | 47.2004  |

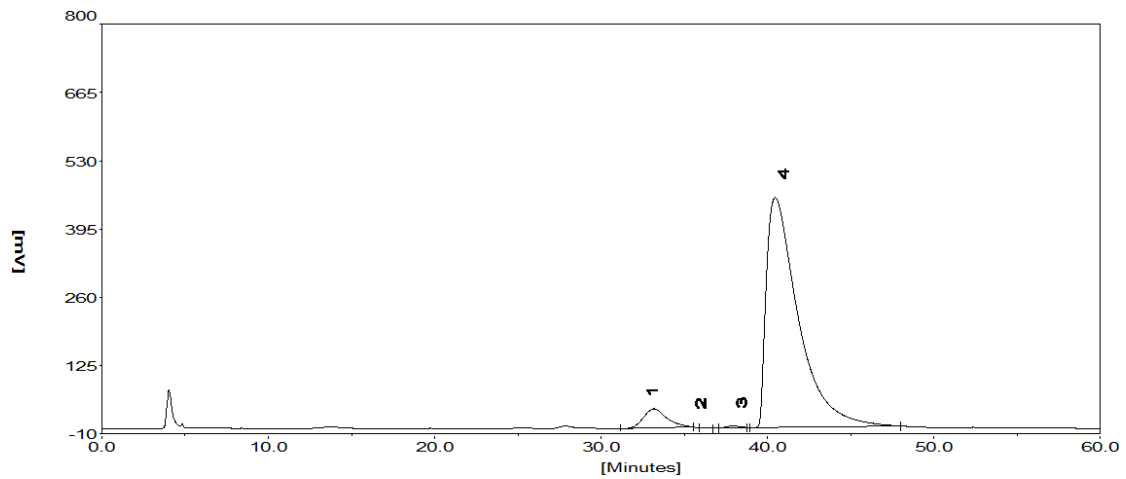

| # | Ret Time (min) | Height (mV) | Area (mV.sec) | Area (%) |
|---|----------------|-------------|---------------|----------|
| 1 | 33.40833       | 29.60       | 1875.01       | 6.9895   |
| 2 | 35.46667       | 0.01        | 14.86         | 0.0237   |
| 3 | 38.01167       | 3.56        | 189.87        | 0.3027   |
| 4 | 41.26667       | 454.74      | 60640.73      | 92.6841  |

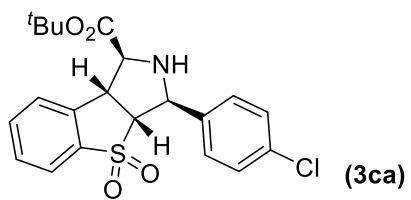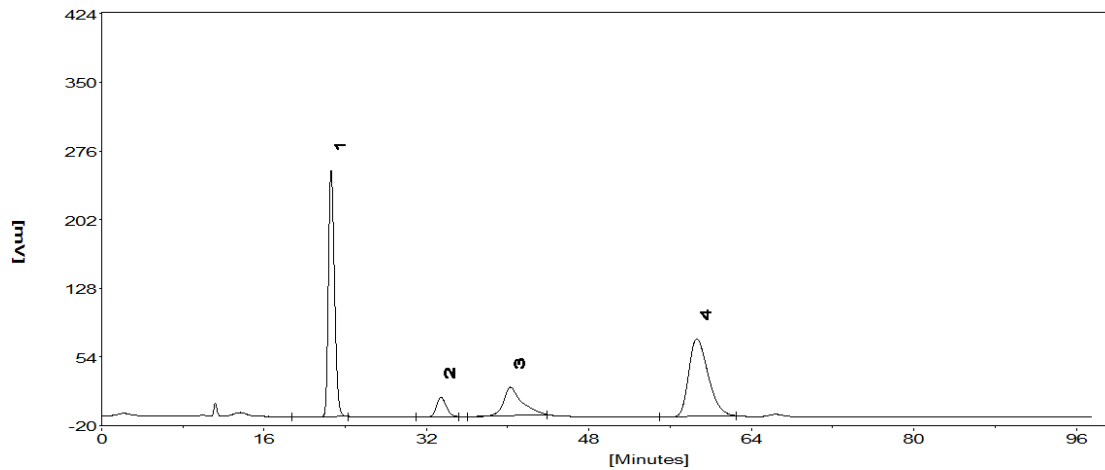

| # | Ret Time (min) | Height (mV) | Area (mV.sec) | Area (%) |
|---|----------------|-------------|---------------|----------|
| 1 | 22.59917       | 265.20      | 10998.61      | 40.5199  |
| 2 | 33.43333       | 21.02       | 1570.97       | 8.0508   |
| 3 | 40.28833       | 30.53       | 2129.16       | 10.9113  |
| 4 | 58.62417       | 83.41       | 10998.09      | 40.5180  |

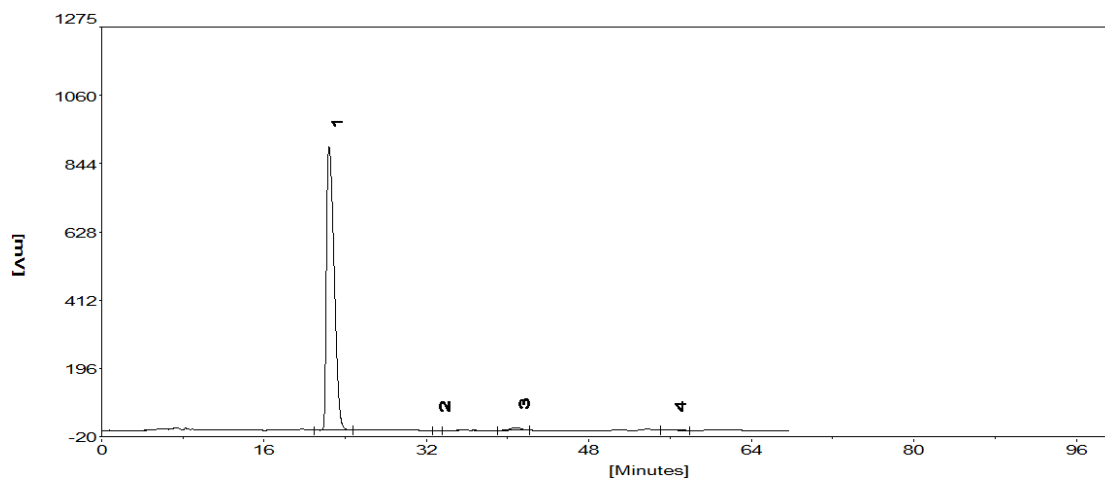

| # | Ret Time (min) | Height (mV) | Area (mV.sec) | Area (%) |
|---|----------------|-------------|---------------|----------|
| 1 | 22.40333       | 897.36      | 47086.23      | 98.4294  |
| 2 | 32.96583       | 0.10        | 2.02          | 0.0042   |
| 3 | 40.84833       | 8.73        | 627.27        | 1.3112   |
| 4 | 57.15667       | 1.41        | 122.03        | 0.2552   |

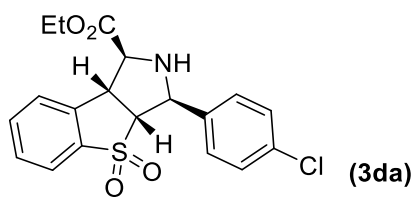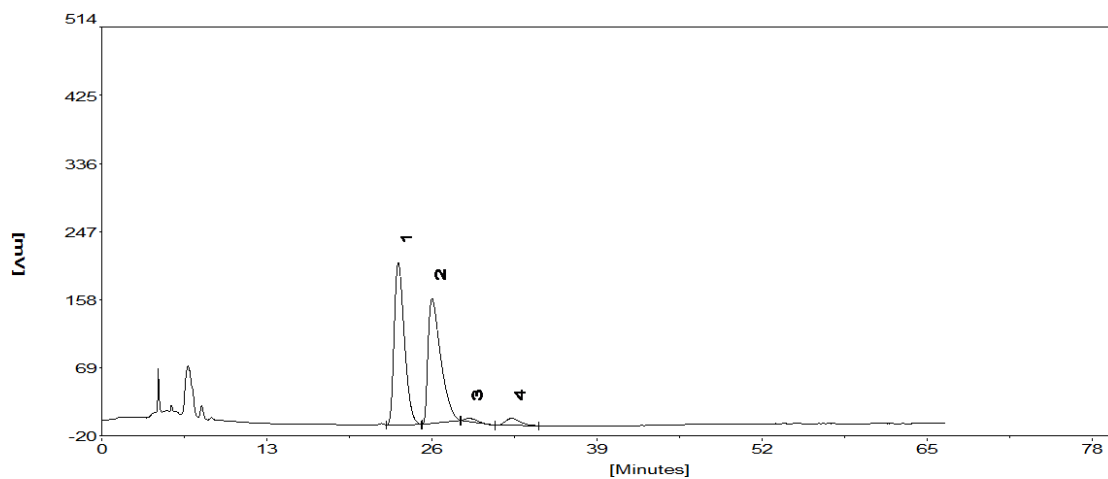

| # | Ret Time (min) | Height (mV) | Area (mV.sec) | Area (%) |
|---|----------------|-------------|---------------|----------|
| 1 | 23.35167       | 211.98      | 11834.83      | 48.9742  |
| 2 | 26.00750       | 163.30      | 11318.42      | 46.8372  |
| 3 | 29.09917       | 4.23        | 276.93        | 1.6460   |
| 4 | 32.29000       | 9.14        | 427.79        | 2.5426   |

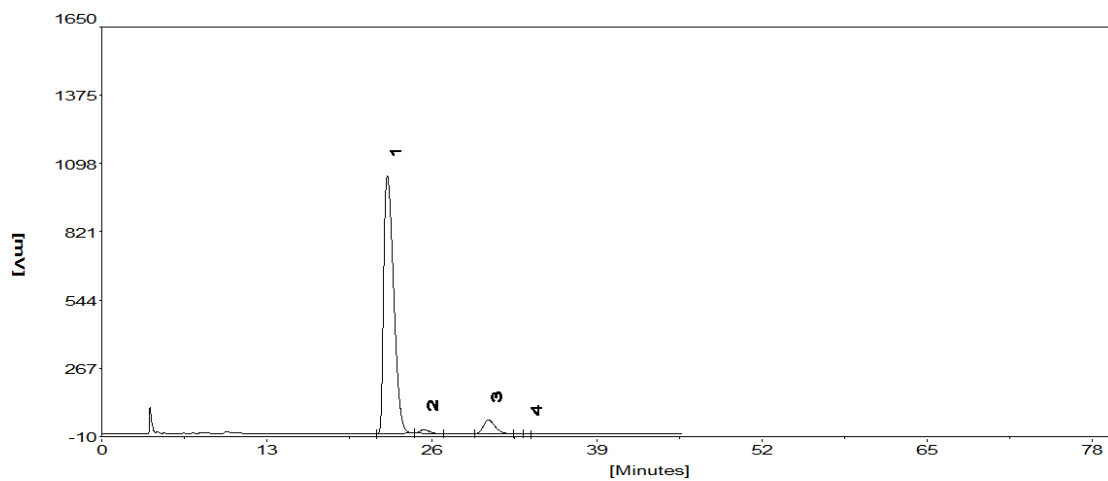

| # | Ret Time (min) | Height (mV) | Area (mV.sec) | Area (%) |
|---|----------------|-------------|---------------|----------|
| 1 | 22.48833       | 1044.96     | 56720.04      | 93.0580  |
| 2 | 25.35917       | 15.31       | 685.64        | 1.1249   |
| 3 | 30.44500       | 55.78       | 3549.16       | 5.8167   |
| 4 | 33.53250       | 0.03        | 0.25          | 0.0004   |



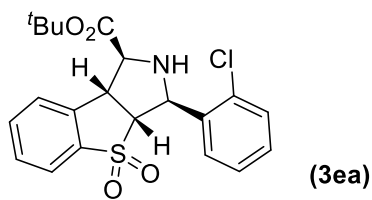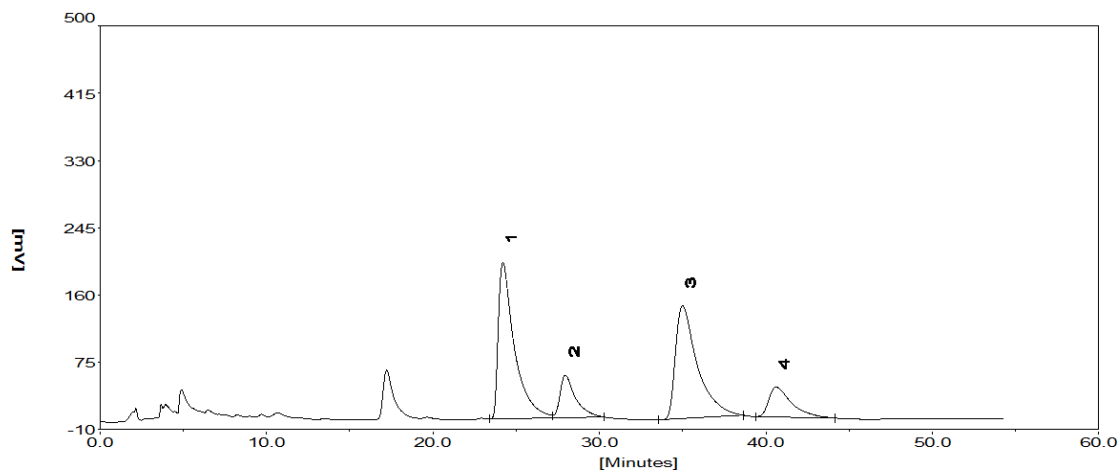

| # | Ret Time (min) | Height (mV) | Area (mV.sec) | Area (%) |
|---|----------------|-------------|---------------|----------|
| 1 | 24.20250       | 197.94      | 13328.61      | 39.8415  |
| 2 | 27.95333       | 53.88       | 3465.04       | 10.3576  |
| 3 | 34.99667       | 142.56      | 13032.21      | 38.9555  |
| 4 | 40.61917       | 37.75       | 3628.24       | 10.8454  |

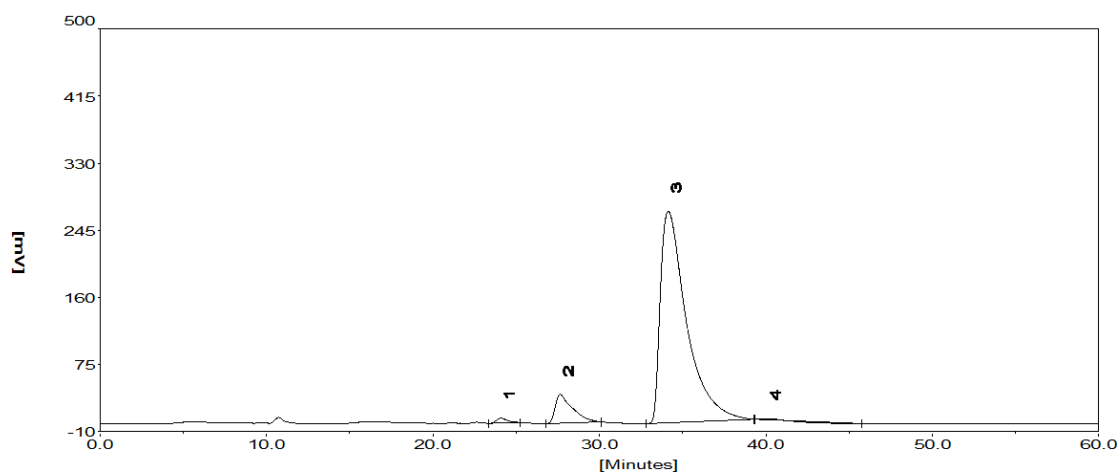

| # | Ret Time (min) | Height (mV) | Area (mV.sec) | Area (%) |
|---|----------------|-------------|---------------|----------|
| 1 | 24.06250       | 6.14        | 277.71        | 0.8583   |
| 2 | 27.65000       | 36.61       | 2618.20       | 8.0920   |
| 3 | 34.13750       | 268.14      | 29326.64      | 90.6388  |
| 4 | 40.04917       | 1.63        | 132.95        | 0.4109   |

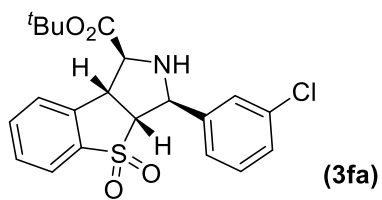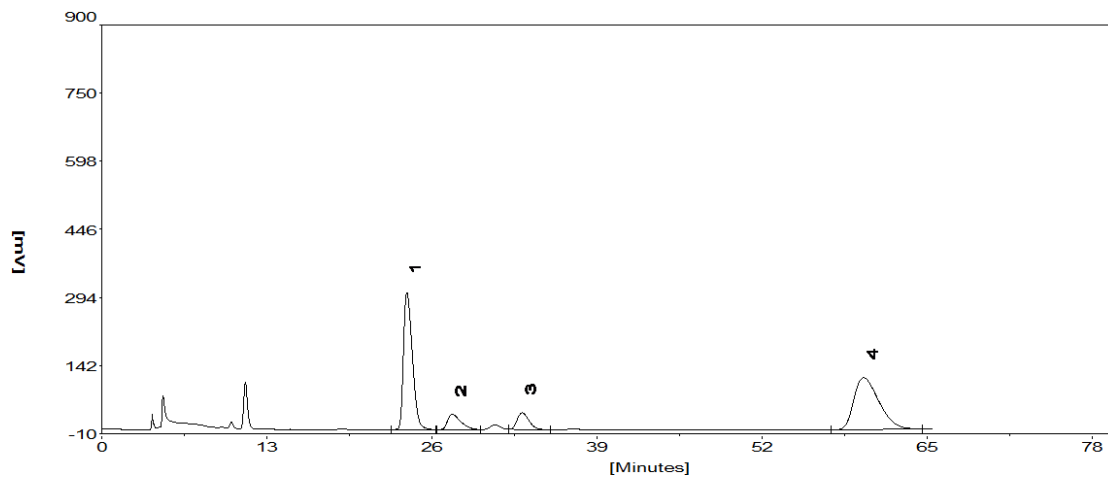

| # | Ret Time (min) | Height (mV) | Area (mV.sec) | Area (%) |
|---|----------------|-------------|---------------|----------|
| 1 | 24.02833       | 305.84      | 14937.16      | 42.8965  |
| 2 | 27.60833       | 34.19       | 2463.83       | 6.9107   |
| 3 | 33.10917       | 37.18       | 2402.66       | 6.7391   |
| 4 | 59.98083       | 115.56      | 15131.18      | 43.4537  |

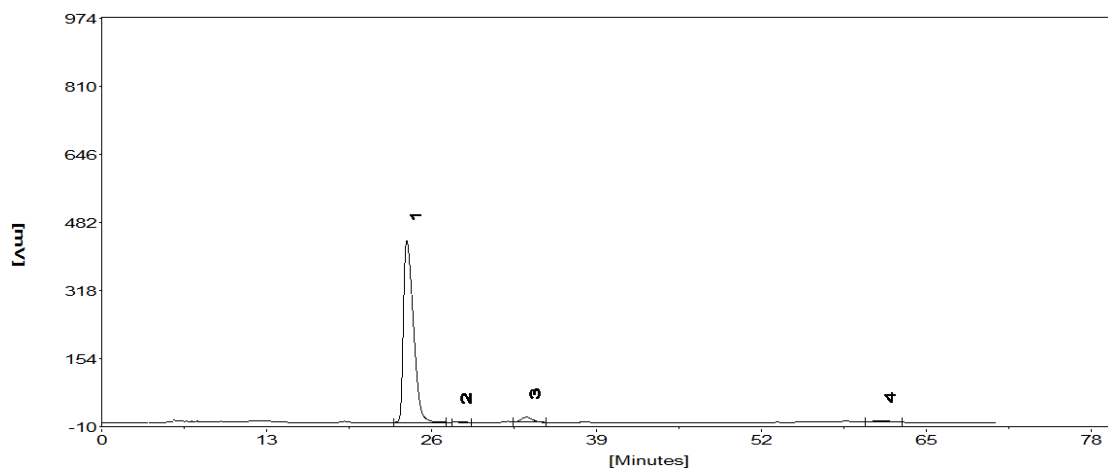

| # | Ret Time (min) | Height (mV) | Area (mV.sec) | Area (%) |
|---|----------------|-------------|---------------|----------|
| 1 | 24.05333       | 437.50      | 23789.68      | 95.8562  |
| 2 | 28.08000       | 0.66        | 33.14         | 0.1335   |
| 3 | 33.47167       | 11.67       | 722.69        | 2.9119   |
| 4 | 60.43667       | 2.89        | 272.60        | 1.0984   |

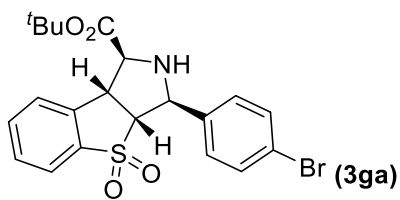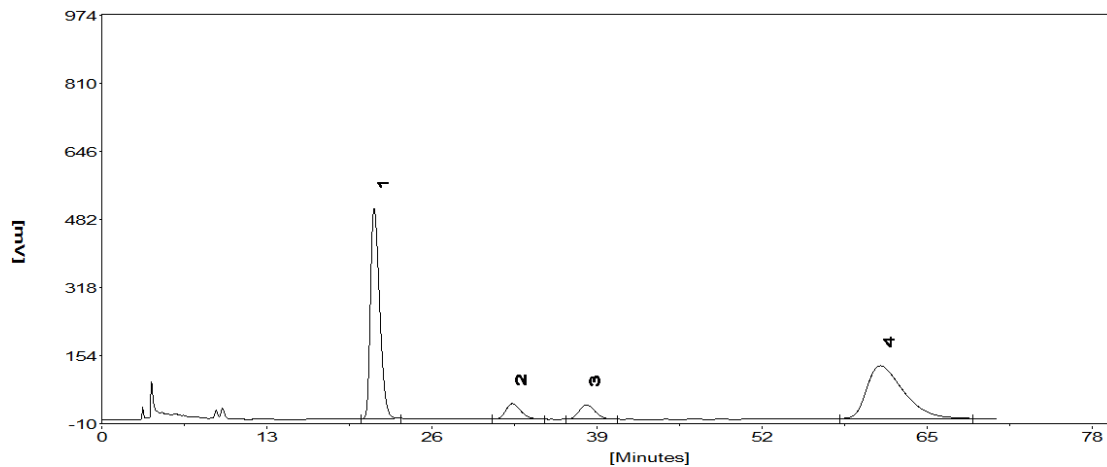

| # | Ret Time (min) | Height (mV) | Area (mV.sec) | Area (%) |
|---|----------------|-------------|---------------|----------|
| 1 | 21.44833       | 505.69      | 25377.74      | 44.7536  |
| 2 | 32.32167       | 37.14       | 3021.45       | 5.3283   |
| 3 | 38.16833       | 34.59       | 3010.07       | 5.3083   |
| 4 | 61.30542       | 126.90      | 25296.22      | 44.6098  |

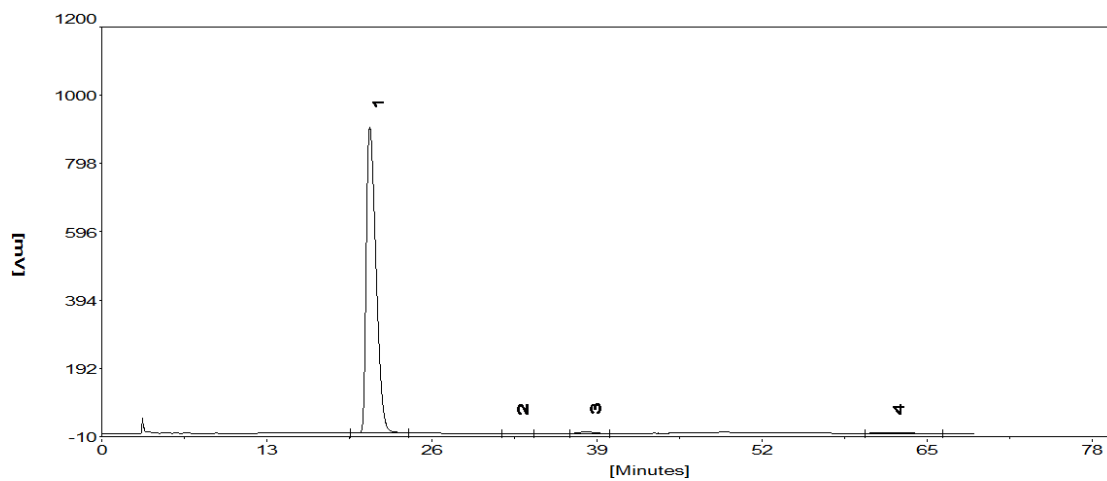

| # | Ret Time (min) | Height (mV) | Area (mV.sec) | Area (%) |
|---|----------------|-------------|---------------|----------|
| 1 | 21.10667       | 903.30      | 48121.74      | 98.7536  |
| 2 | 32.47417       | 0.38        | 28.72         | 0.0589   |
| 3 | 38.22167       | 4.76        | 397.81        | 0.8164   |
| 4 | 62.05000       | 0.94        | 180.82        | 0.3711   |

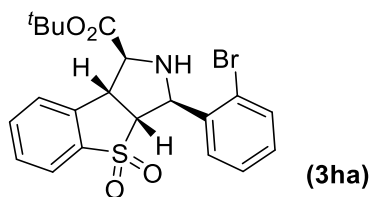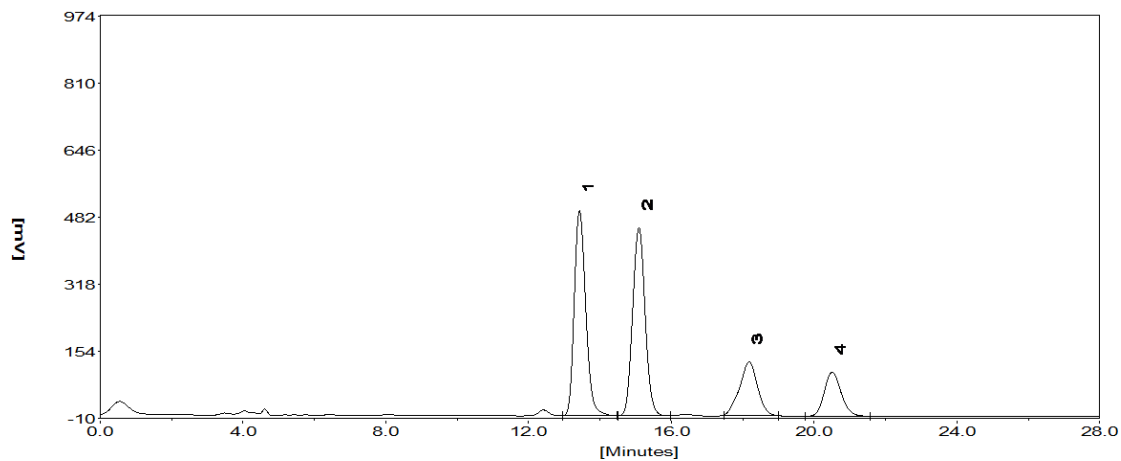

| # | Ret Time (min) | Height (mV) | Area (mV.sec) | Area (%) |
|---|----------------|-------------|---------------|----------|
| 1 | 13.42583       | 500.51      | 11161.77      | 36.7201  |
| 2 | 15.09083       | 459.74      | 11174.50      | 36.7620  |
| 3 | 18.17583       | 131.03      | 4556.44       | 13.9898  |
| 4 | 20.50417       | 107.54      | 4080.37       | 12.5281  |

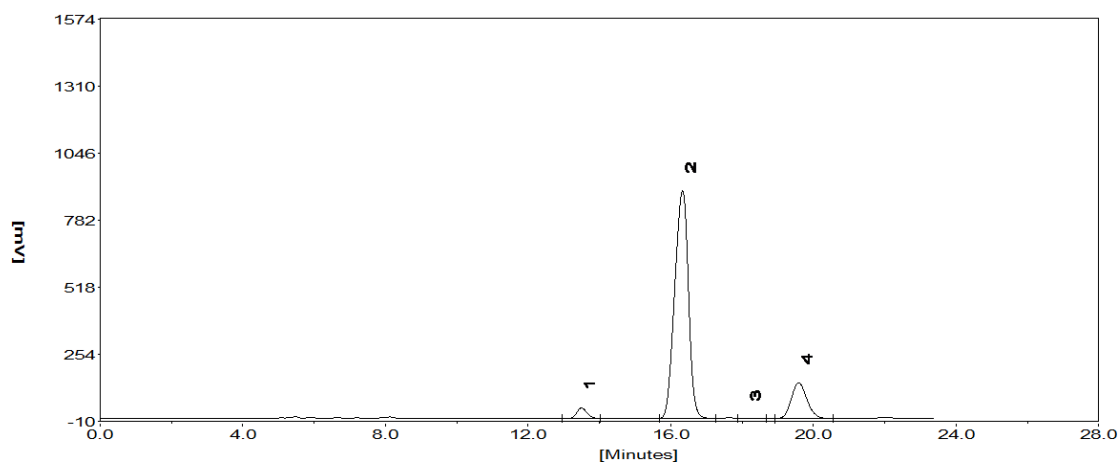

| # | Ret Time (min) | Height (mV) | Area (mV.sec) | Area (%) |
|---|----------------|-------------|---------------|----------|
| 1 | 13.49500       | 41.56       | 853.59        | 2.9314   |
| 2 | 16.33167       | 896.71      | 23961.85      | 82.2904  |
| 3 | 18.13083       | 0.53        | 7.74          | 0.0266   |
| 4 | 19.58417       | 141.38      | 4295.47       | 14.7516  |

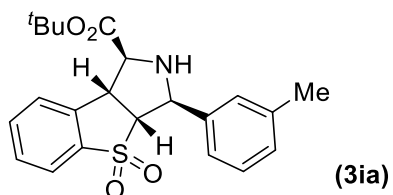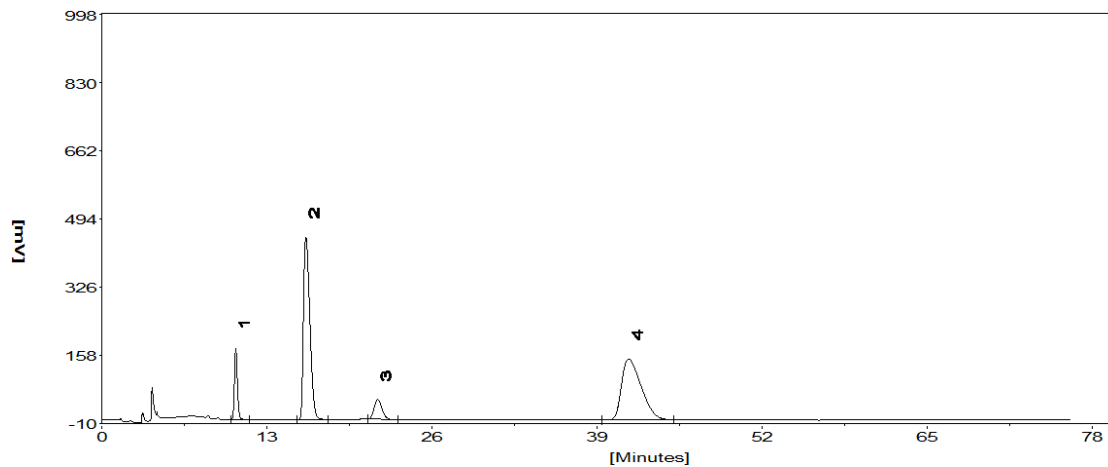

| # | Ret Time (min) | Height (mV) | Area (mV.sec) | Area (%) |
|---|----------------|-------------|---------------|----------|
| 1 | 10.55833       | 175.20      | 2580.02       | 6.7632   |
| 2 | 16.07667       | 450.43      | 15316.69      | 43.7130  |
| 3 | 21.72750       | 47.96       | 2288.88       | 6.0001   |
| 4 | 41.48167       | 150.22      | 15250.30      | 43.5237  |

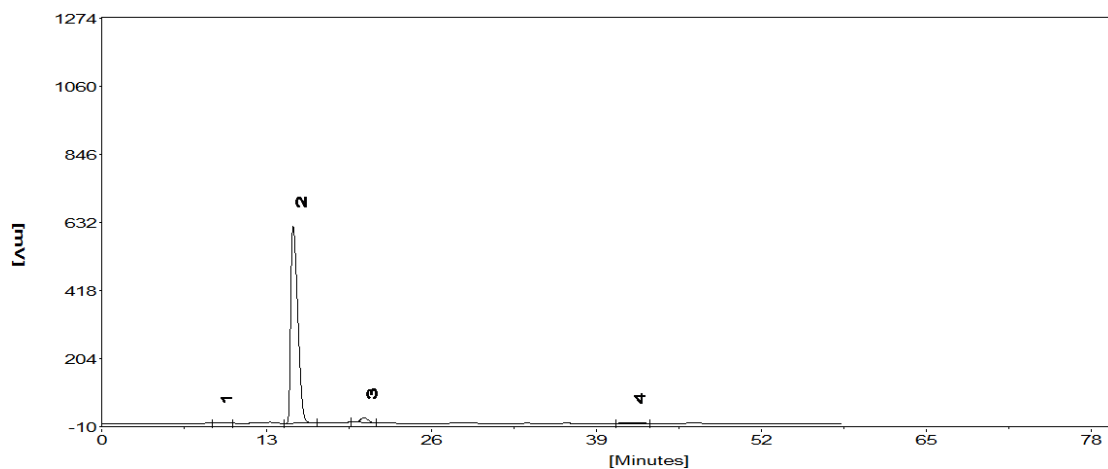

| # | Ret Time (min) | Height (mV) | Area (mV.sec) | Area (%) |
|---|----------------|-------------|---------------|----------|
| 1 | 9.18000        | 0.17        | 1.79          | 0.0073   |
| 2 | 15.09250       | 619.02      | 23653.42      | 96.4214  |
| 3 | 20.67083       | 15.63       | 625.67        | 2.5505   |
| 4 | 41.76417       | 3.00        | 250.42        | 1.0208   |

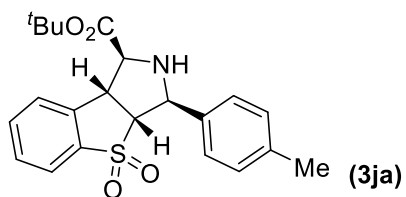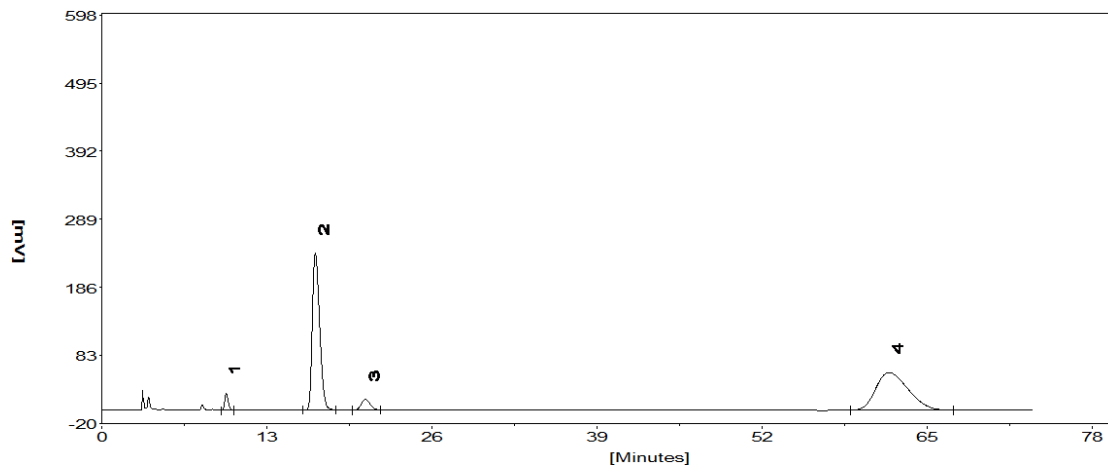

| # | Ret Time (min) | Height (mV) | Area (mV.sec) | Area (%) |
|---|----------------|-------------|---------------|----------|
| 1 | 9.81167        | 25.28       | 665.89        | 2.7685   |
| 2 | 16.82167       | 236.48      | 9457.22       | 46.4253  |
| 3 | 20.77083       | 16.30       | 774.46        | 3.2199   |
| 4 | 62.26167       | 57.00       | 9693.73       | 47.5863  |

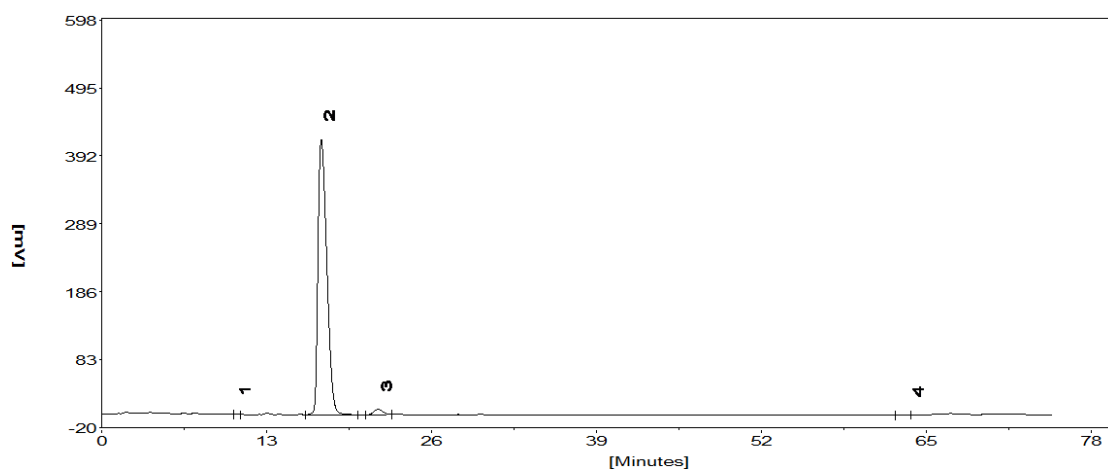

| # | Ret Time (min) | Height (mV) | Area (mV.sec) | Area (%) |
|---|----------------|-------------|---------------|----------|
| 1 | 10.64333       | 0.10        | 0.89          | 0.0043   |
| 2 | 17.30917       | 417.25      | 20155.29      | 98.0406  |
| 3 | 21.78917       | 8.23        | 393.82        | 1.9157   |
| 4 | 63.66333       | 0.13        | 8.11          | 0.0394   |

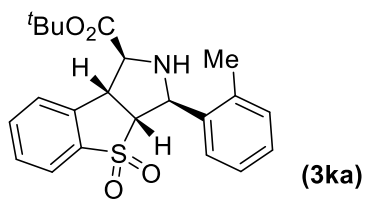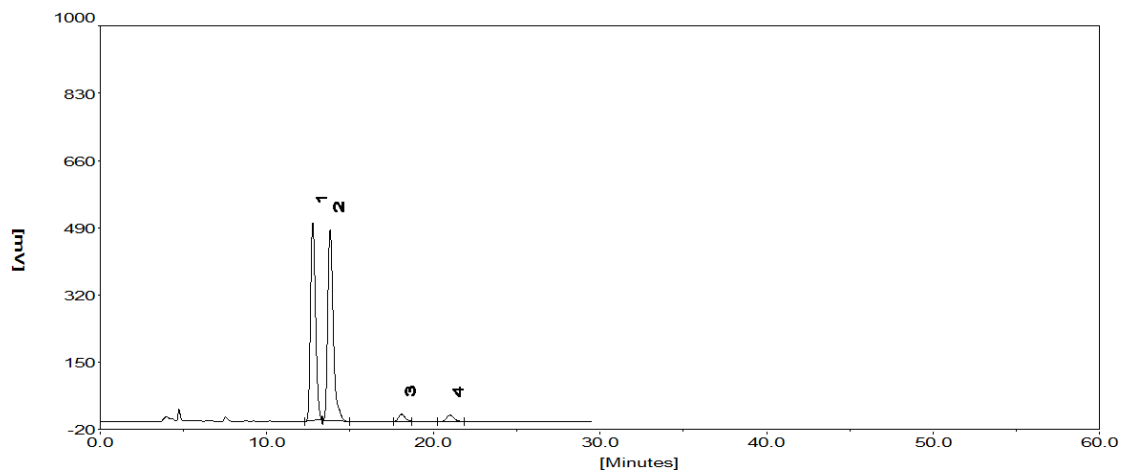

| # | Ret Time (min) | Height (mV) | Area (mV.sec) | Area (%) |
|---|----------------|-------------|---------------|----------|
| 1 | 12.76000       | 500.63      | 10430.99      | 46.2312  |
| 2 | 13.80250       | 482.32      | 11162.69      | 49.4742  |
| 3 | 18.09083       | 17.67       | 468.75        | 2.0776   |
| 4 | 21.19750       | 15.96       | 500.24        | 2.2170   |

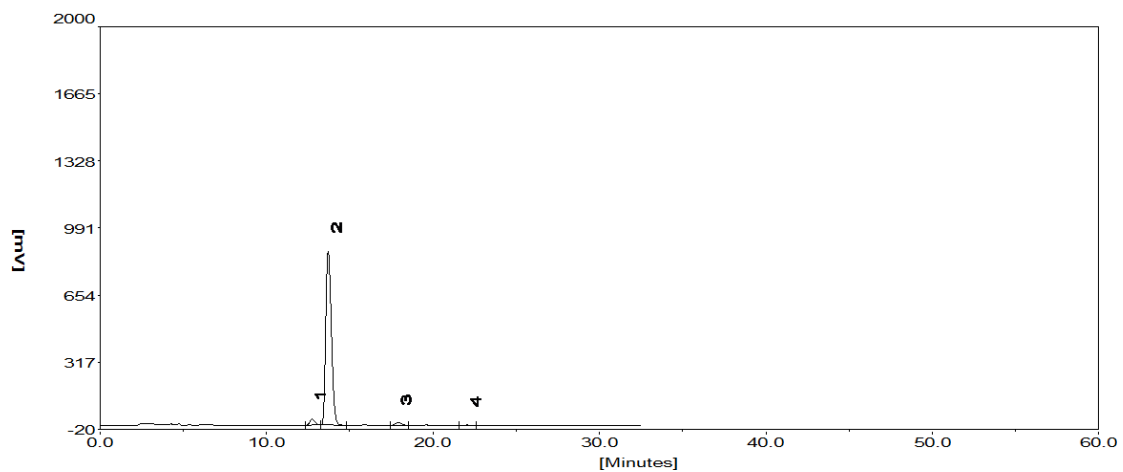

| # | Ret Time (min) | Height (mV) | Area (mV.sec) | Area (%) |
|---|----------------|-------------|---------------|----------|
| 1 | 12.74000       | 28.98       | 623.08        | 2.8961   |
| 2 | 13.70500       | 872.10      | 20469.11      | 95.1429  |
| 3 | 18.01167       | 13.68       | 359.15        | 1.6693   |
| 4 | 22.05333       | 2.15        | 62.75         | 0.2917   |

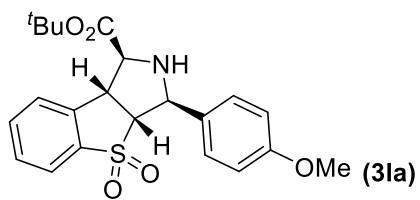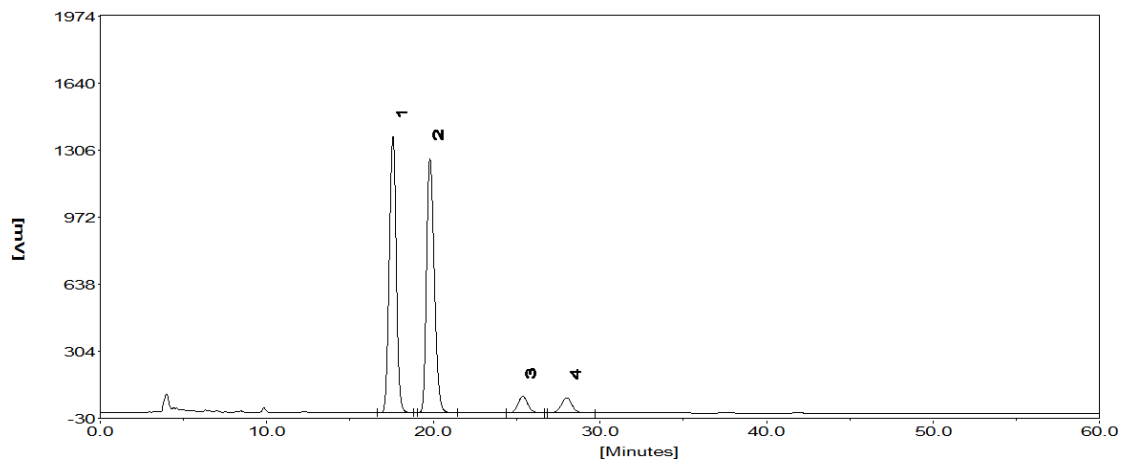

| # | Ret Time (min) | Height (mV) | Area (mV.sec) | Area (%) |
|---|----------------|-------------|---------------|----------|
| 1 | 17.57667       | 1373.87     | 40236.63      | 45.8879  |
| 2 | 19.79083       | 1264.70     | 40813.39      | 46.5457  |
| 3 | 25.36250       | 82.05       | 3313.71       | 3.7791   |
| 4 | 28.00917       | 75.45       | 3320.83       | 3.7873   |

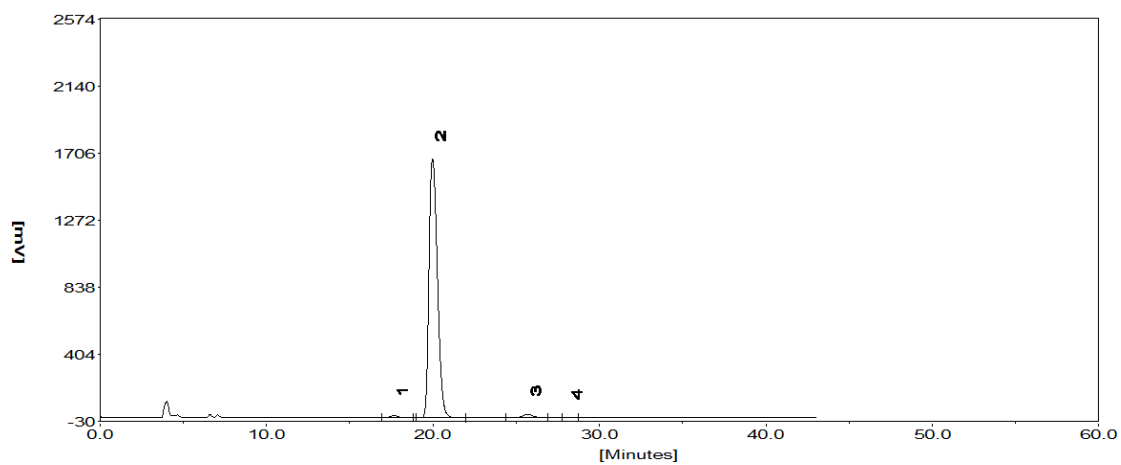

| # | Ret Time (min) | Height (mV) | Area (mV.sec) | Area (%) |
|---|----------------|-------------|---------------|----------|
| 1 | 17.66167       | 14.48       | 424.83        | 0.7105   |
| 2 | 19.97167       | 1672.32     | 58512.59      | 97.8555  |
| 3 | 25.66833       | 20.67       | 848.04        | 1.4182   |
| 4 | 28.16667       | 0.31        | 9.43          | 0.0158   |



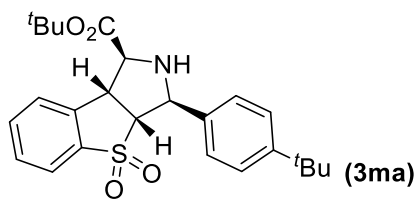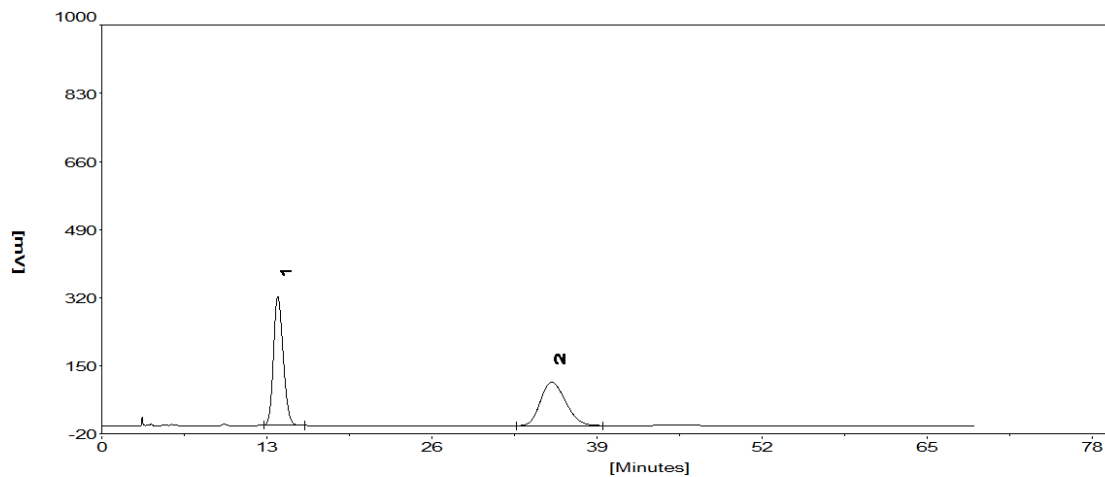

| # | Ret Time (min) | Height (mV) | Area (mV.sec) | Area (%) |
|---|----------------|-------------|---------------|----------|
| 1 | 13.86250       | 320.83      | 16990.48      | 51.2406  |
| 2 | 35.42583       | 108.60      | 16167.76      | 48.7594  |

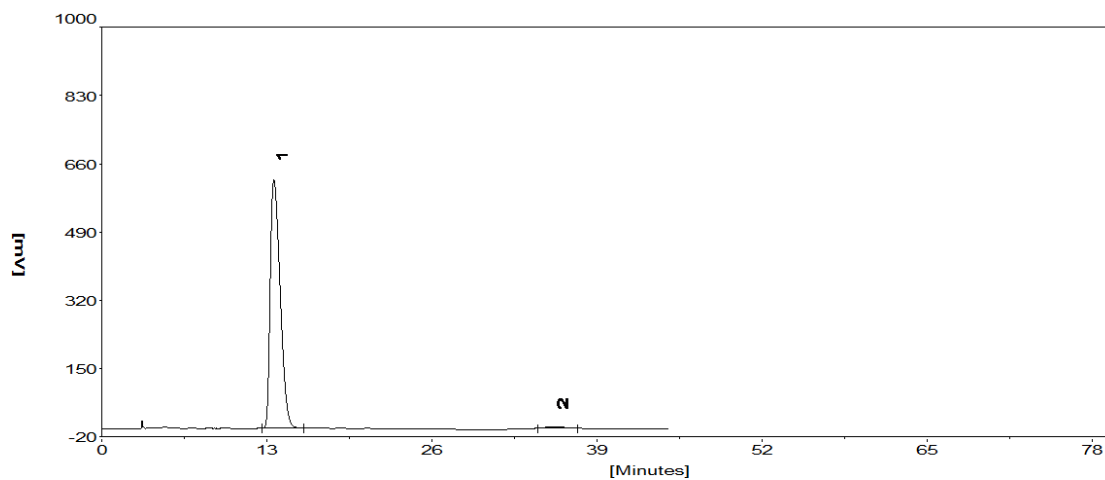

| # | Ret Time (min) | Height (mV) | Area (mV.sec) | Area (%) |
|---|----------------|-------------|---------------|----------|
| 1 | 13.55667       | 618.88      | 33623.37      | 99.3253  |
| 2 | 35.64167       | 3.04        | 228.40        | 0.6747   |

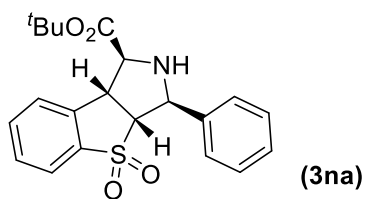

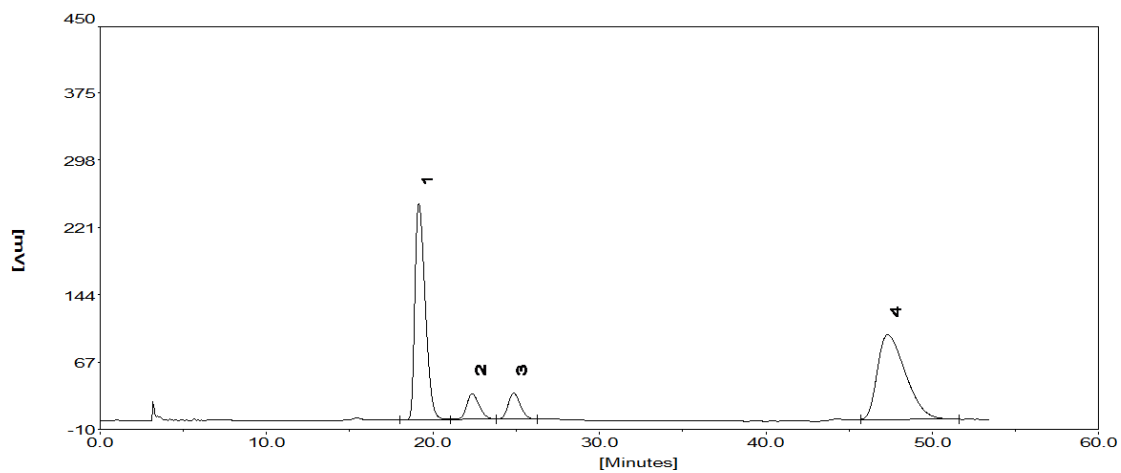

| # | Ret Time (min) | Height (mV) | Area (mV.sec) | Area (%) |
|---|----------------|-------------|---------------|----------|
| 1 | 19.15083       | 247.22      | 10654.31      | 43.5836  |
| 2 | 22.35333       | 29.16       | 1523.81       | 6.0904   |
| 3 | 24.84500       | 29.57       | 1505.60       | 6.0176   |
| 4 | 48.31917       | 96.90       | 10831.47      | 44.3084  |

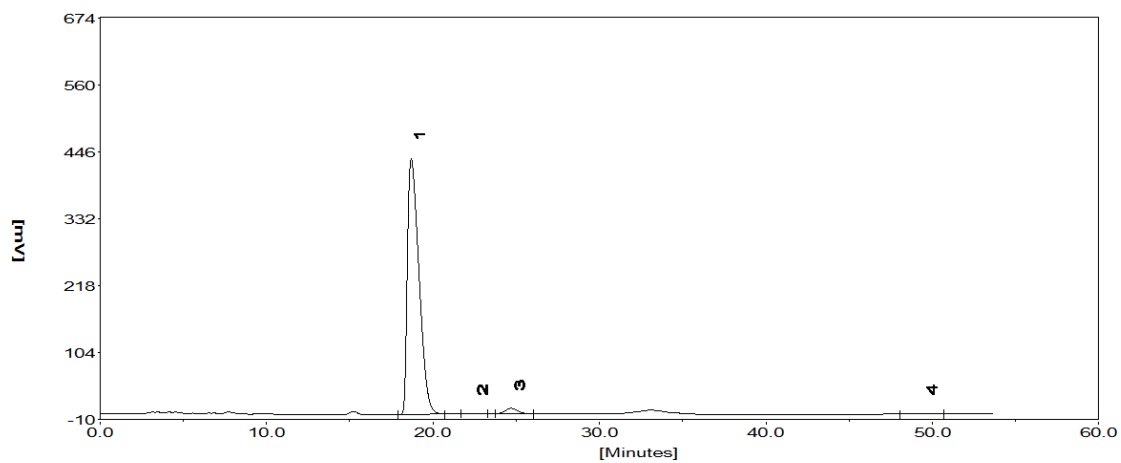

| # | Ret Time (min) | Height (mV) | Area (mV.sec) | Area (%) |
|---|----------------|-------------|---------------|----------|
| 1 | 18.69250       | 435.51      | 21056.15      | 97.1700  |
| 2 | 22.47583       | 0.56        | 26.51         | 0.1223   |
| 3 | 24.68250       | 9.20        | 468.86        | 2.1637   |
| 4 | 49.08000       | 1.33        | 117.88        | 0.5440   |

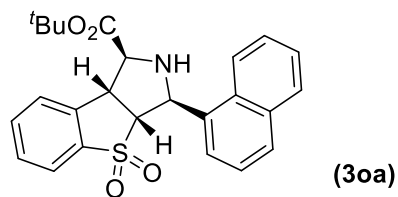

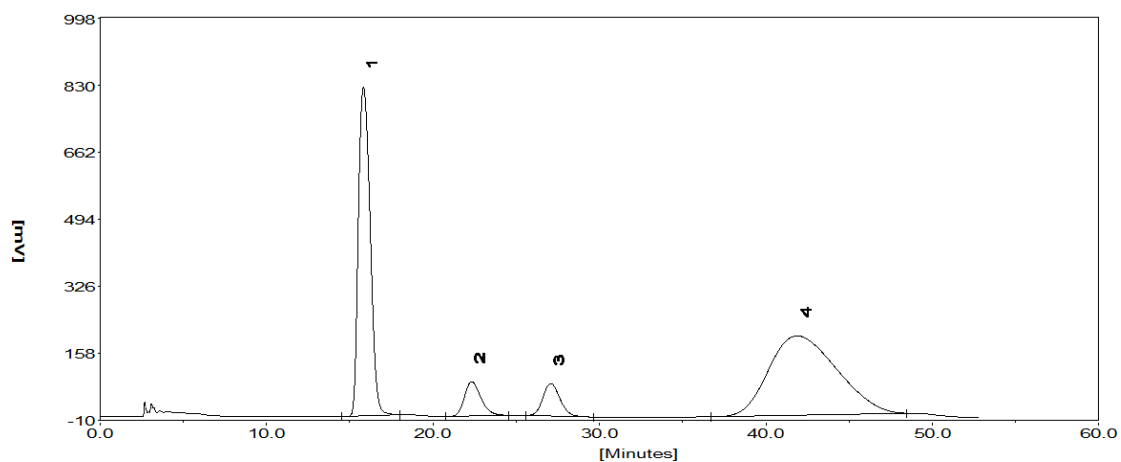

| # | Ret Time (min) | Height (mV) | Area (mV.sec) | Area (%) |
|---|----------------|-------------|---------------|----------|
| 1 | 15.82333       | 823.70      | 40634.56      | 43.3618  |
| 2 | 22.32417       | 86.02       | 5883.98       | 5.4101   |
| 3 | 27.07333       | 81.51       | 5775.36       | 5.3102   |
| 4 | 41.89500       | 199.00      | 43029.89      | 45.9179  |

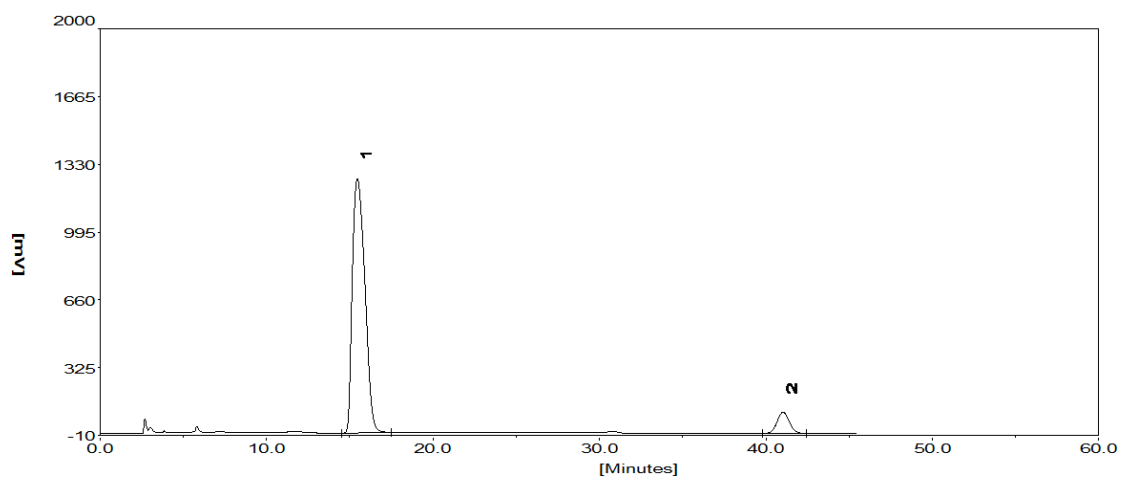

| # | Ret Time (min) | Height (mV) | Area (mV.sec) | Area (%) |
|---|----------------|-------------|---------------|----------|
| 1 | 15.45583       | 1259.08     | 65882.90      | 92.6026  |
| 2 | 41.02833       | 104.84      | 5262.95       | 7.3974   |

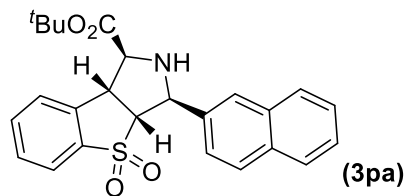

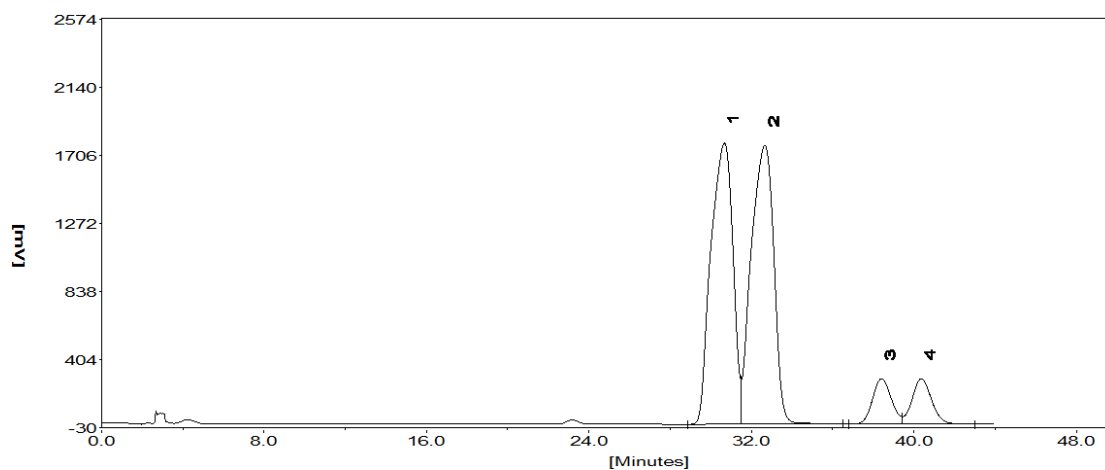

| # | Ret Time (min) | Height (mV) | Area (mV.sec) | Area (%) |
|---|----------------|-------------|---------------|----------|
| 1 | 30.97167       | 1789.55     | 134475.27     | 43.4828  |
| 2 | 33.26167       | 1775.96     | 137229.43     | 44.3734  |
| 3 | 38.40917       | 288.92      | 18454.31      | 5.9672   |
| 4 | 40.36667       | 288.97      | 19101.76      | 6.1766   |

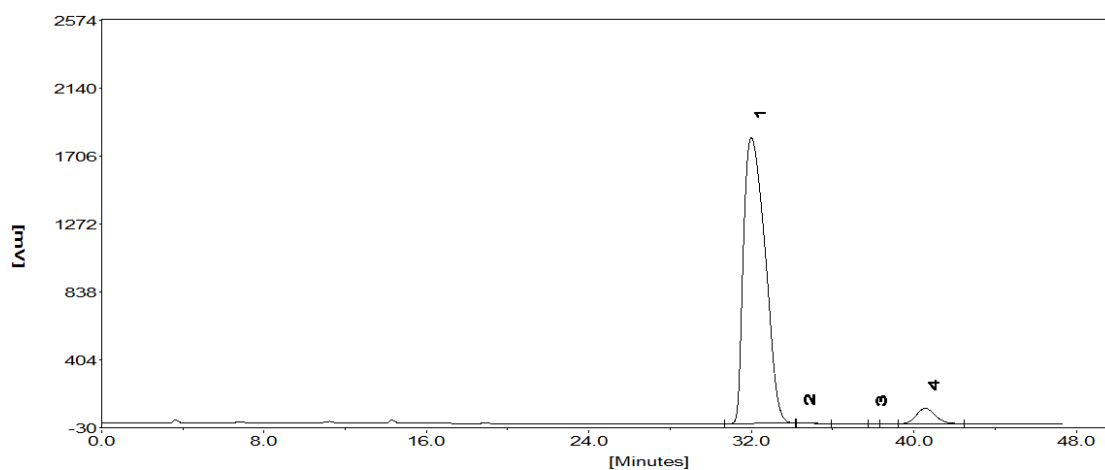

| # | Ret Time (min) | Height (mV) | Area (mV.sec) | Area (%) |
|---|----------------|-------------|---------------|----------|
| 1 | 31.99833       | 1823.34     | 134042.30     | 95.4589  |
| 2 | 34.44583       | 1.08        | 12.29         | 0.0088   |
| 3 | 38.77833       | 0.09        | 1.21          | 0.0009   |
| 4 | 41.26333       | 97.92       | 6363.11       | 4.5315   |

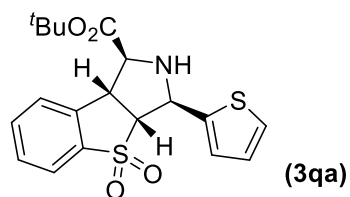

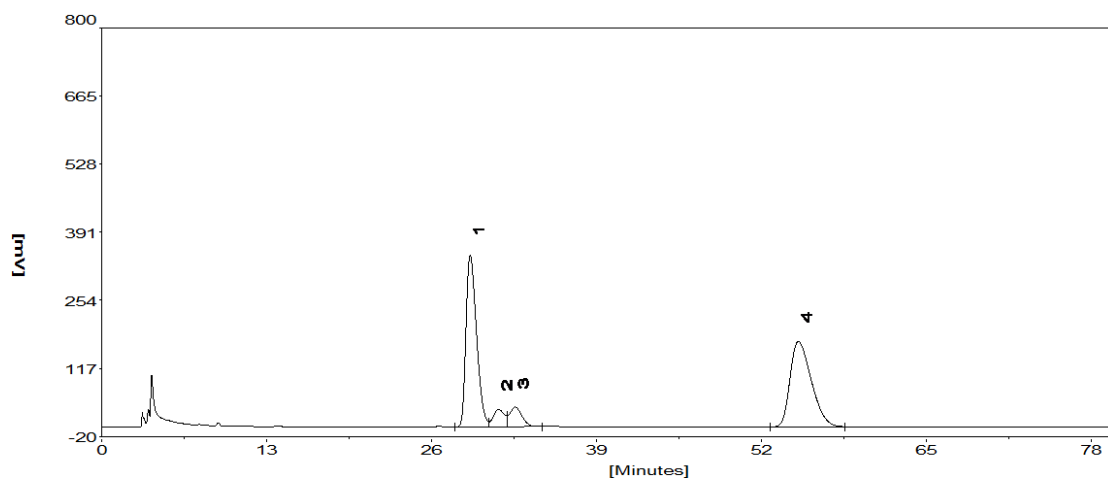

| # | Ret Time (min) | Height (mV) | Area (mV.sec) | Area (%) |
|---|----------------|-------------|---------------|----------|
| 1 | 29.04250       | 344.79      | 19917.99      | 44.7218  |
| 2 | 31.27833       | 34.62       | 2109.31       | 5.0360   |
| 3 | 32.59500       | 36.24       | 2364.22       | 5.6446   |
| 4 | 54.90500       | 171.41      | 19862.69      | 44.5976  |

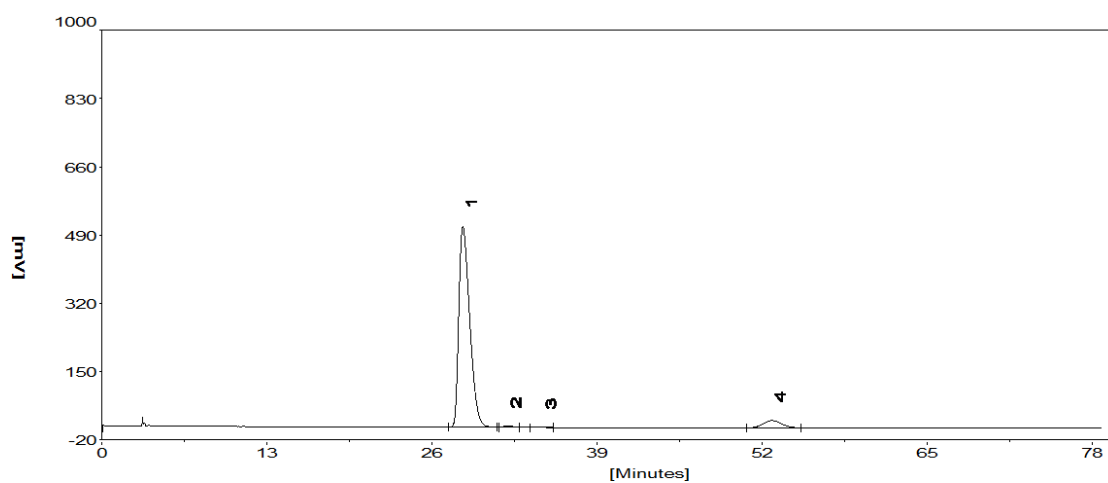

| # | Ret Time (min) | Height (mV) | Area (mV.sec) | Area (%) |
|---|----------------|-------------|---------------|----------|
| 1 | 28.43833       | 499.43      | 29713.45      | 93.7778  |
| 2 | 31.97417       | 2.37        | 120.61        | 0.3807   |
| 3 | 33.72750       | 0.62        | 31.04         | 0.0980   |
| 4 | 53.25500       | 18.22       | 1819.86       | 5.7436   |

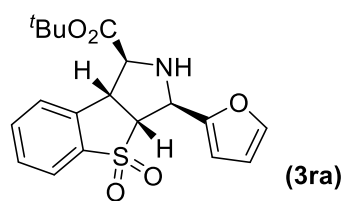

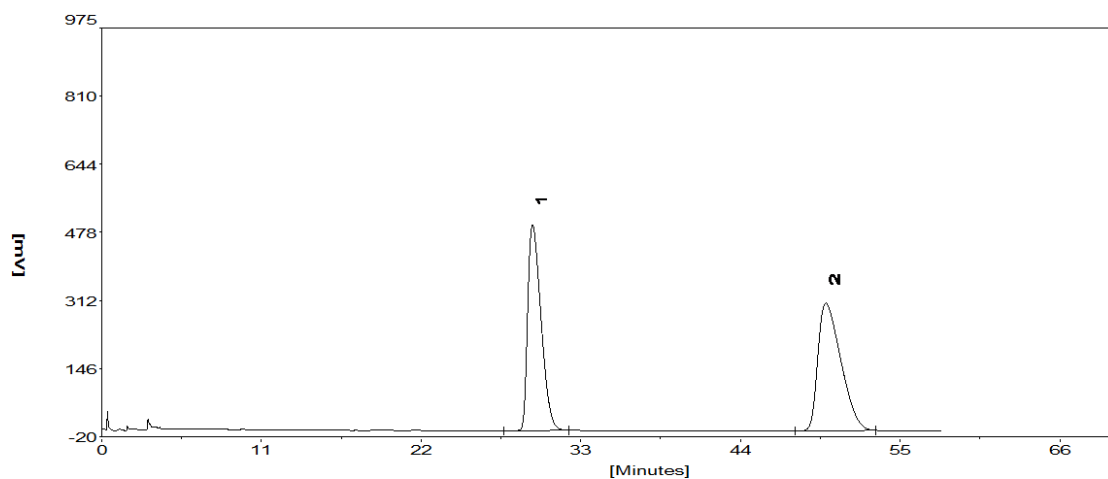

| # | Ret Time (min) | Height (mV) | Area (mV.sec) | Area (%) |
|---|----------------|-------------|---------------|----------|
| 1 | 29.67917       | 501.24      | 31873.13      | 48.3450  |
| 2 | 49.88583       | 310.79      | 34055.40      | 51.6550  |

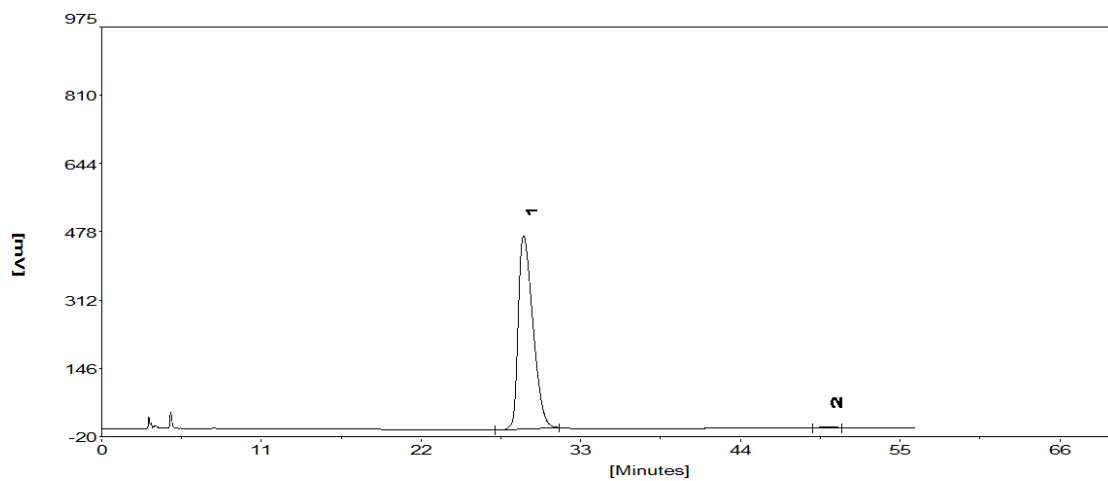

| # | Ret Time (min) | Height (mV) | Area (mV.sec) | Area (%) |
|---|----------------|-------------|---------------|----------|
| 1 | 29.06333       | 470.27      | 32974.63      | 99.3609  |
| 2 | 50.06500       | 2.91        | 212.08        | 0.6391   |

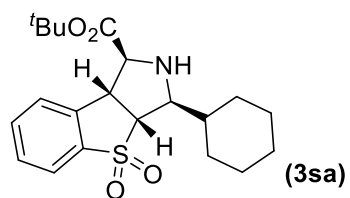

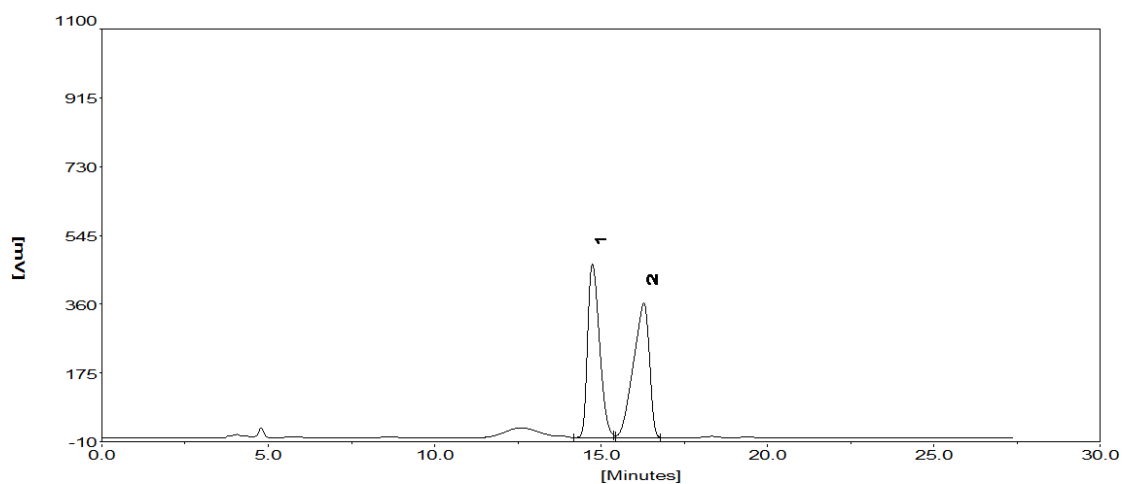

| # | Ret Time (min) | Height (mV) | Area (mV.sec) | Area (%) |
|---|----------------|-------------|---------------|----------|
| 1 | 14.94000       | 467.50      | 11618.64      | 49.0748  |
| 2 | 16.28583       | 362.58      | 12056.73      | 50.9252  |

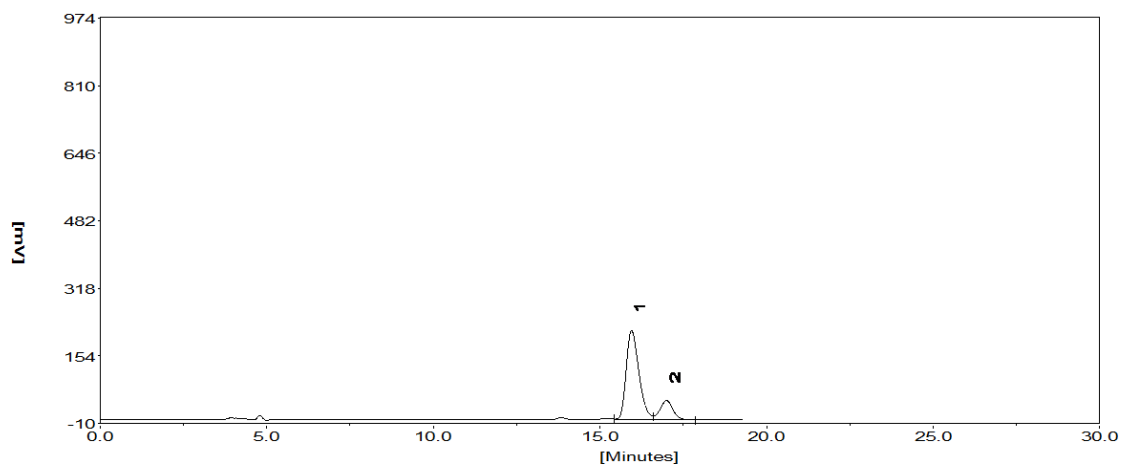

| # | Ret Time (min) | Height (mV) | Area (mV.sec) | Area (%) |
|---|----------------|-------------|---------------|----------|
| 1 | 15.90583       | 400.23      | 11359.13      | 85.2666  |
| 2 | 16.96917       | 97.77       | 1962.77       | 14.7334  |

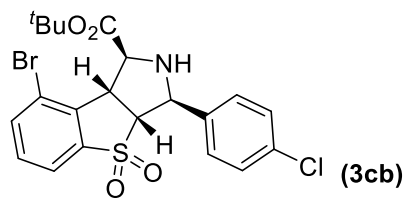

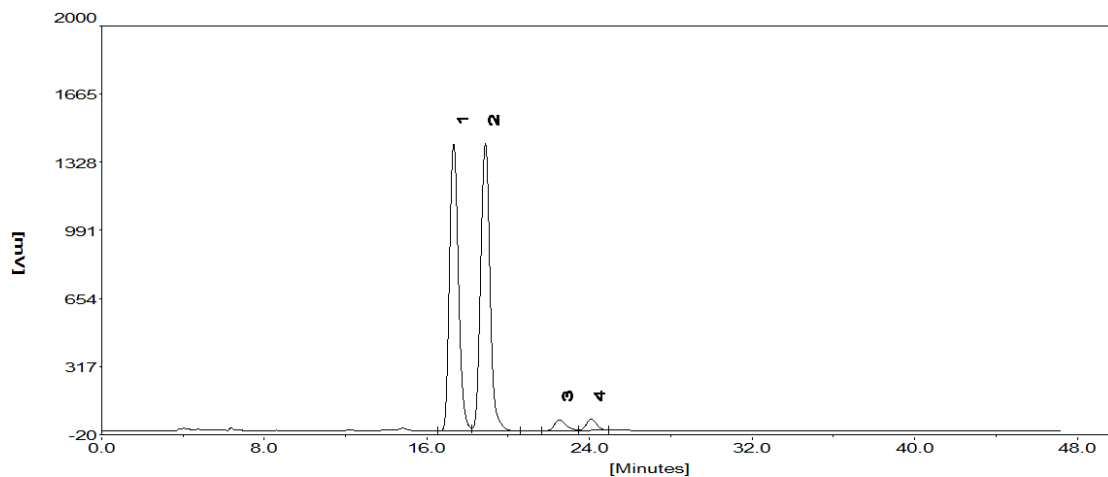

| # | Ret Time (min) | Height (mV) | Area (mV.sec) | Area (%) |
|---|----------------|-------------|---------------|----------|
| 1 | 17.32333       | 1420.10     | 43429.82      | 46.7418  |
| 2 | 18.88333       | 1420.19     | 45440.34      | 48.9057  |
| 3 | 22.51250       | 54.11       | 2083.38       | 2.2423   |
| 4 | 24.08750       | 55.71       | 1960.73       | 2.1102   |

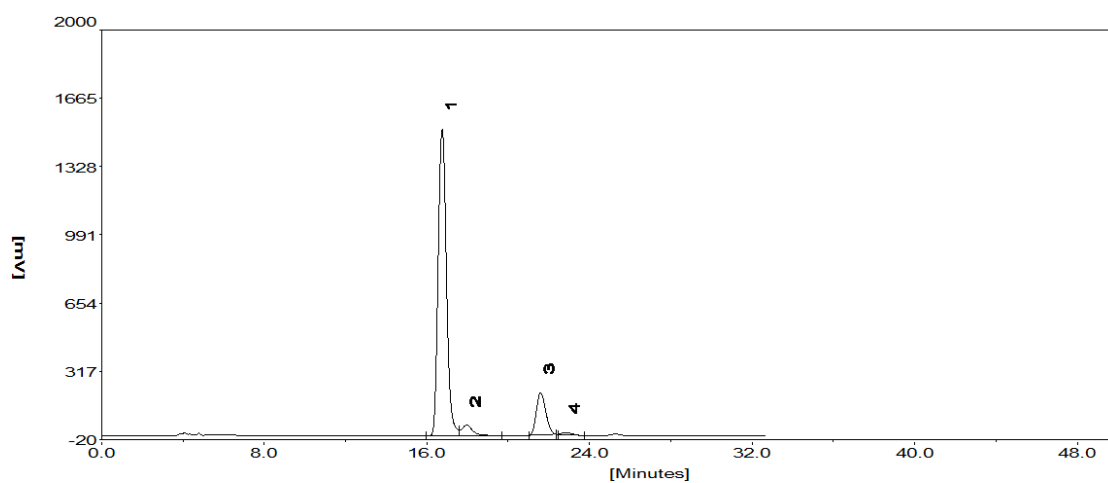

| # | Ret Time (min) | Height (mV) | Area (mV.sec) | Area (%) |
|---|----------------|-------------|---------------|----------|
| 1 | 16.75500       | 1511.94     | 42920.02      | 83.2916  |
| 2 | 17.95583       | 53.31       | 1973.93       | 3.2031   |
| 3 | 21.59667       | 207.93      | 6646.04       | 12.8045  |
| 4 | 23.02750       | 11.44       | 363.75        | 0.7008   |

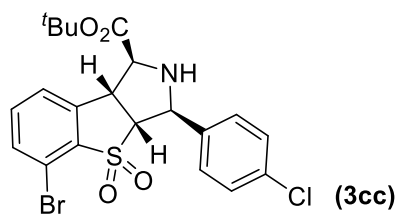



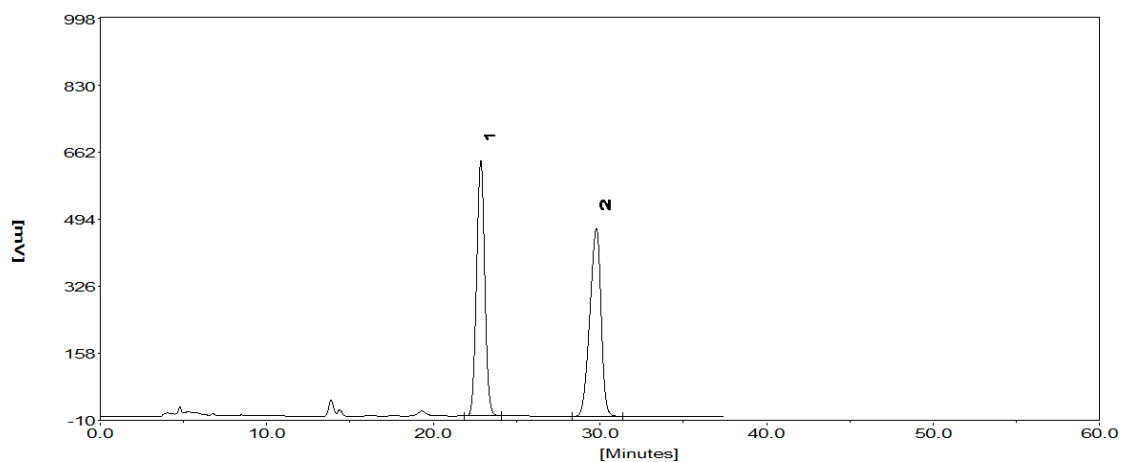

| # | Ret Time (min) | Height (mV) | Area (mV.sec) | Area (%) |
|---|----------------|-------------|---------------|----------|
| 1 | 22.84833       | 640.75      | 21883.26      | 49.8176  |
| 2 | 29.78667       | 472.15      | 22043.53      | 50.1824  |

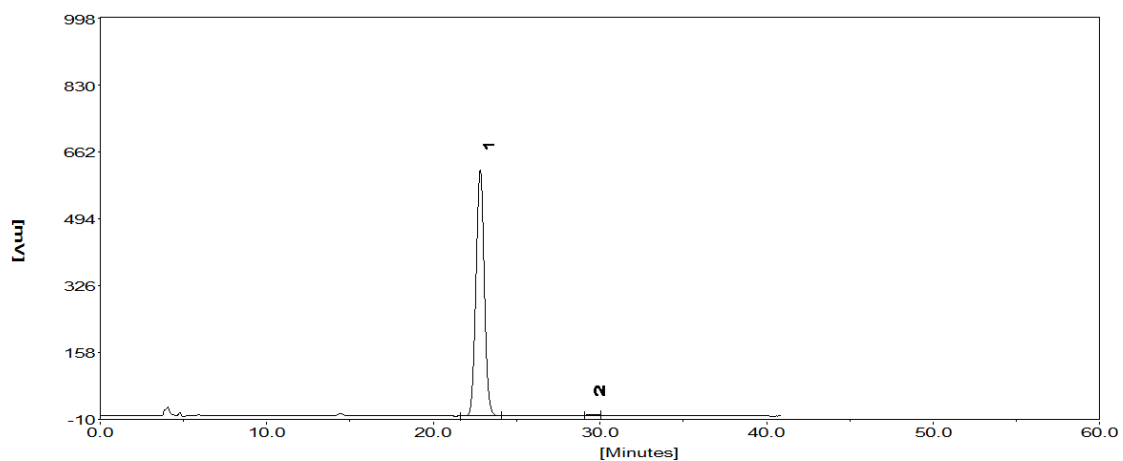

| # | Ret Time (min) | Height (mV) | Area (mV.sec) | Area (%) |
|---|----------------|-------------|---------------|----------|
| 1 | 22.81667       | 619.16      | 21488.99      | 99.6512  |
| 2 | 29.49417       | 2.30        | 75.22         | 0.3488   |

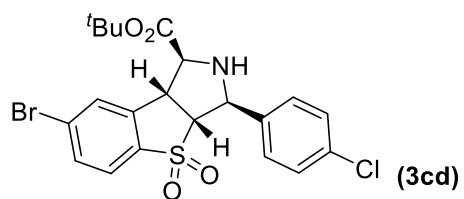

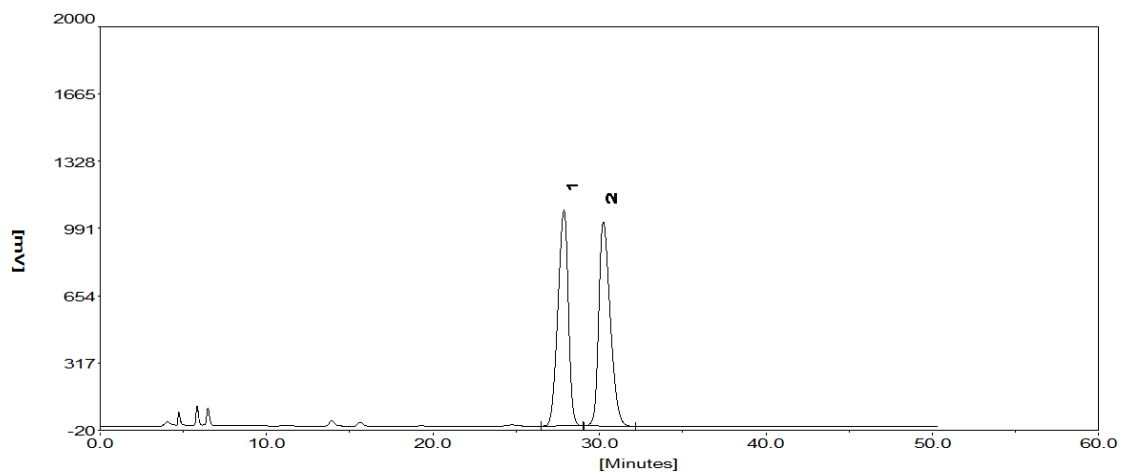

| # | Ret Time (min) | Height (mV) | Area (mV.sec) | Area (%) |
|---|----------------|-------------|---------------|----------|
| 1 | 27.86917       | 1081.35     | 46862.13      | 48.9610  |
| 2 | 30.23500       | 1022.63     | 48851.00      | 51.0390  |

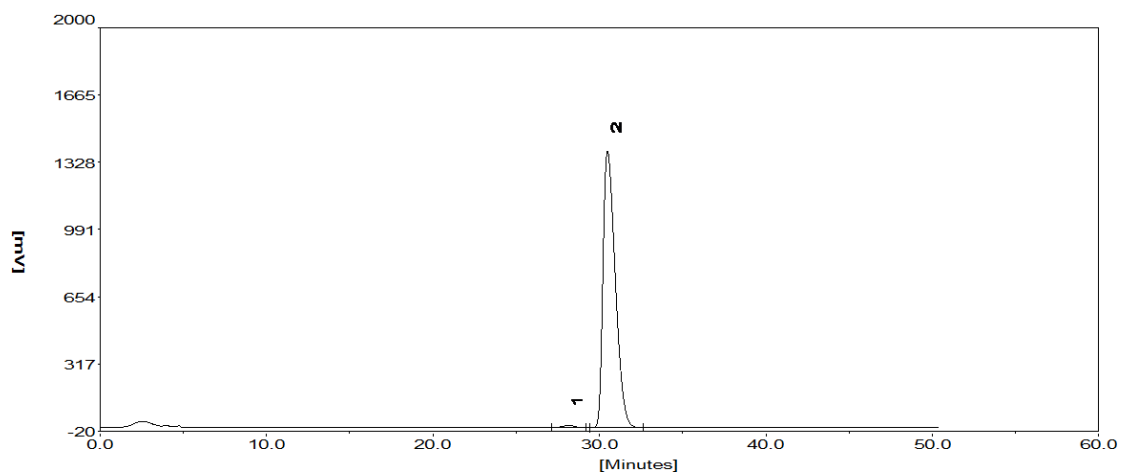

| # | Ret Time (min) | Height (mV) | Area (mV.sec) | Area (%) |
|---|----------------|-------------|---------------|----------|
| 1 | 28.15333       | 9.97        | 422.72        | 0.5942   |
| 2 | 30.48583       | 1384.90     | 70715.81      | 99.4058  |

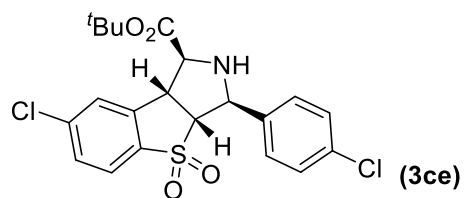

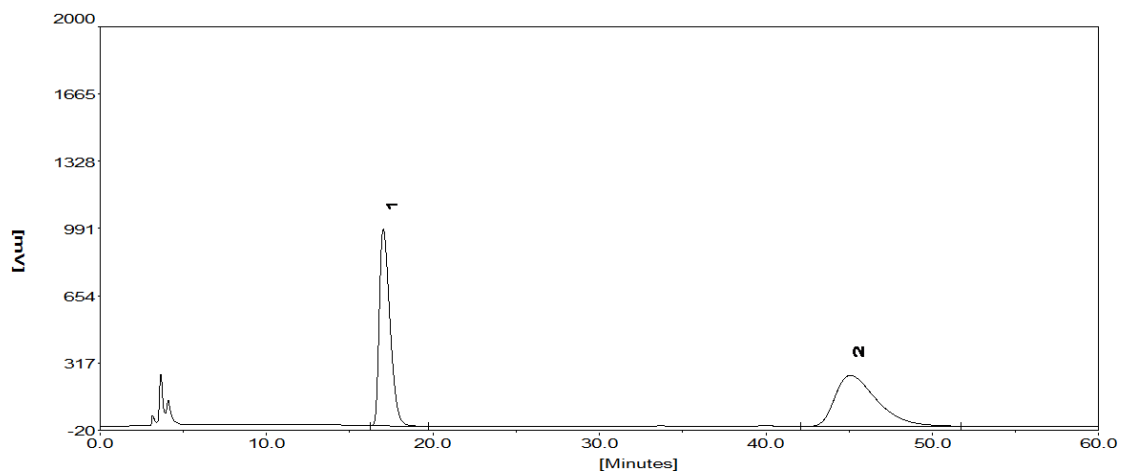

| # | Ret Time (min) | Height (mV) | Area (mV.sec) | Area (%) |
|---|----------------|-------------|---------------|----------|
| 1 | 17.01667       | 986.36      | 43888.15      | 49.5529  |
| 2 | 44.06917       | 256.25      | 44680.15      | 50.4471  |

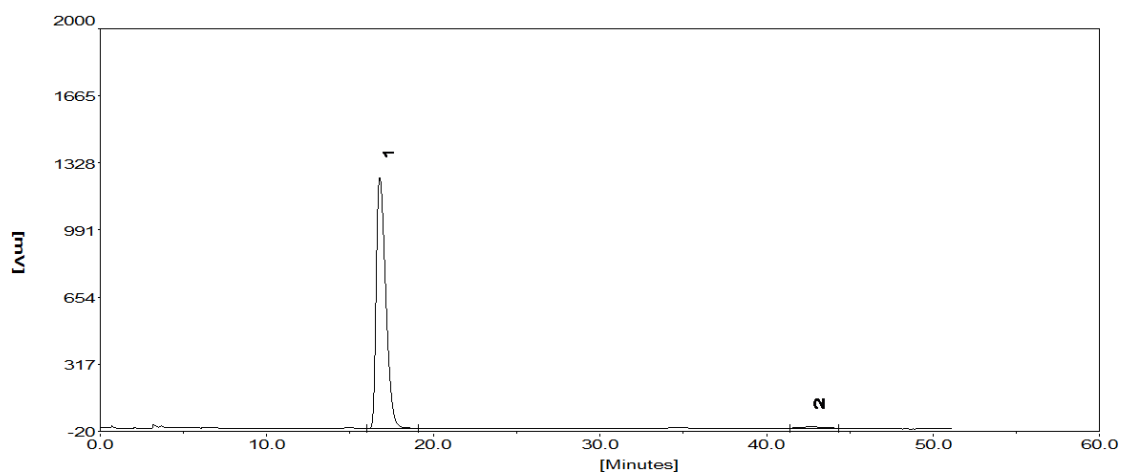

| # | Ret Time (min) | Height (mV) | Area (mV.sec) | Area (%) |
|---|----------------|-------------|---------------|----------|
| 1 | 16.78417       | 1259.93     | 49878.81      | 98.9885  |
| 2 | 43.34667       | 5.94        | 509.68        | 1.0115   |

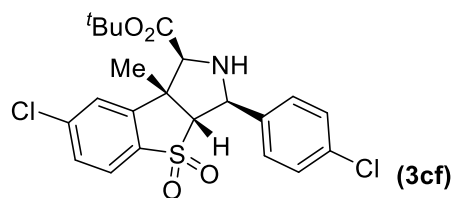

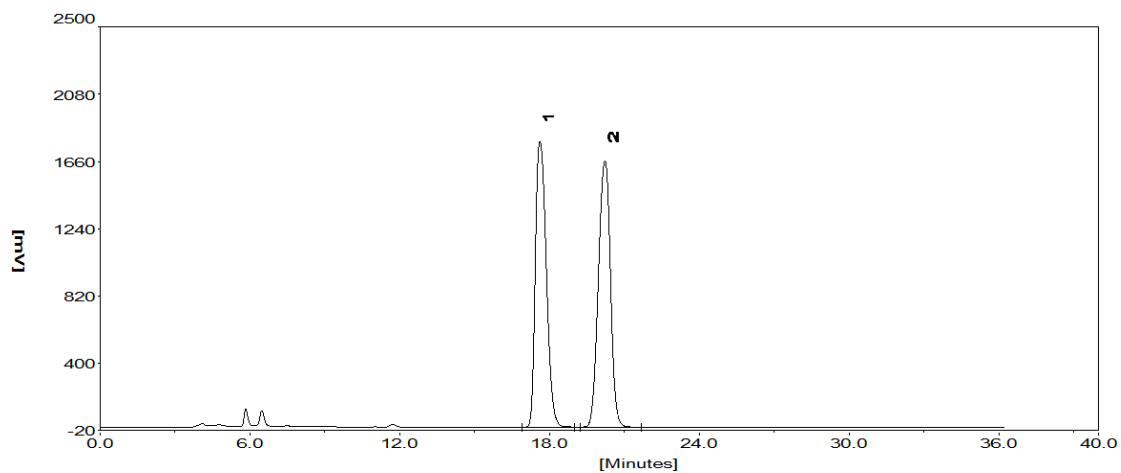

| # | Ret Time (min) | Height (mV) | Area (mV.sec) | Area (%) |
|---|----------------|-------------|---------------|----------|
| 1 | 17.61750       | 1784.98     | 54288.17      | 49.3207  |
| 2 | 20.22250       | 1664.80     | 55783.61      | 50.6793  |

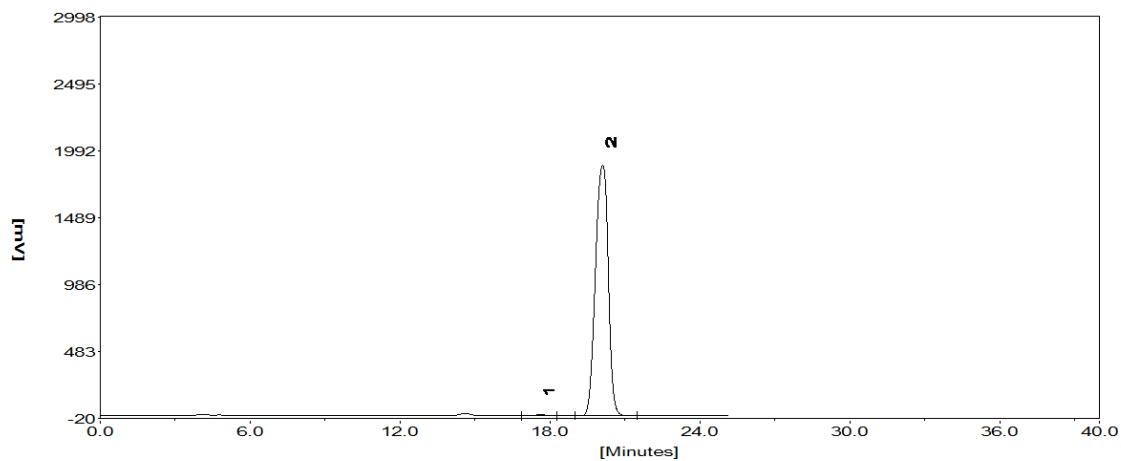

| # | Ret Time (min) | Height (mV) | Area (mV.sec) | Area (%) |
|---|----------------|-------------|---------------|----------|
| 1 | 17.60500       | 8.82        | 229.25        | 0.3405   |
| 2 | 20.10917       | 1880.96     | 67100.55      | 99.6595  |

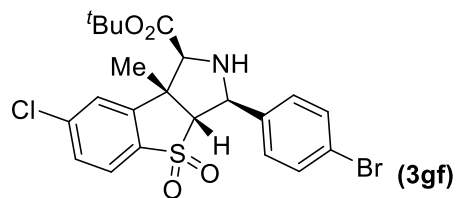

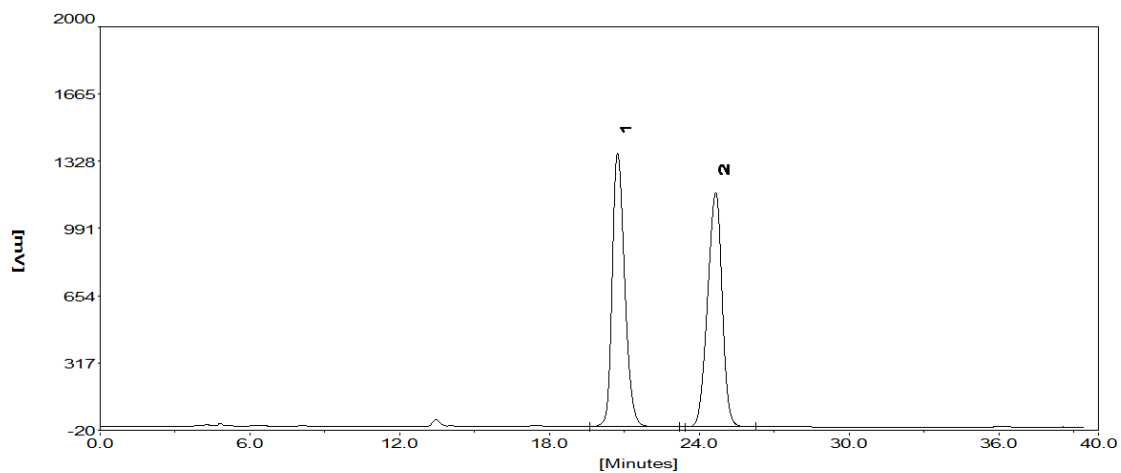

| # | Ret Time (min) | Height (mV) | Area (mV.sec) | Area (%) |
|---|----------------|-------------|---------------|----------|
| 1 | 20.72750       | 1371.40     | 47593.04      | 50.0676  |
| 2 | 24.65833       | 1172.67     | 47464.52      | 49.9324  |

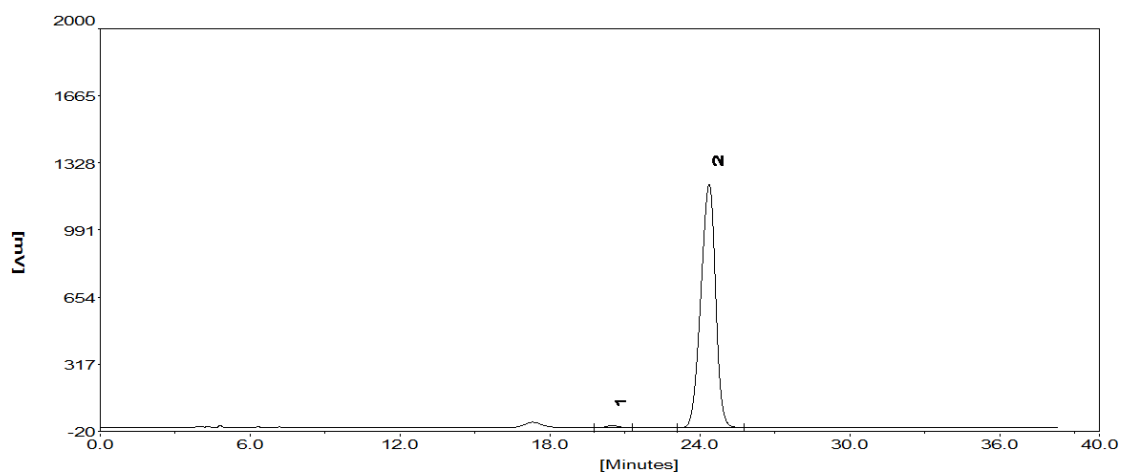

| # | Ret Time (min) | Height (mV) | Area (mV.sec) | Area (%) |
|---|----------------|-------------|---------------|----------|
| 1 | 20.49083       | 10.66       | 334.25        | 0.6648   |
| 2 | 24.37167       | 1221.75     | 49947.55      | 99.3352  |

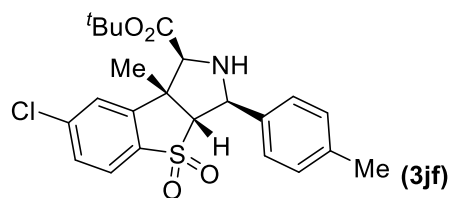

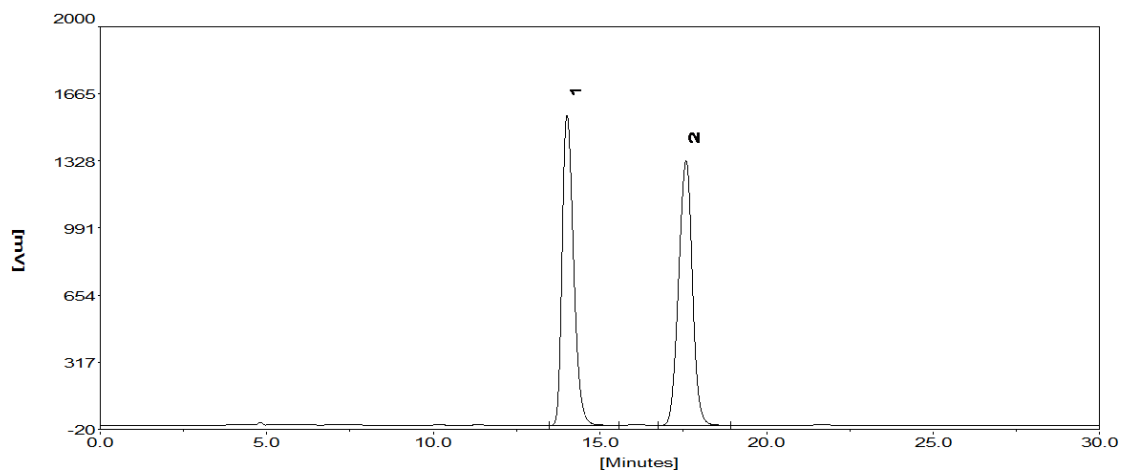

| # | Ret Time (min) | Height (mV) | Area (mV.sec) | Area (%) |
|---|----------------|-------------|---------------|----------|
| 1 | 14.01167       | 1556.85     | 37119.84      | 49.3079  |
| 2 | 17.58500       | 1328.36     | 38161.93      | 50.6921  |

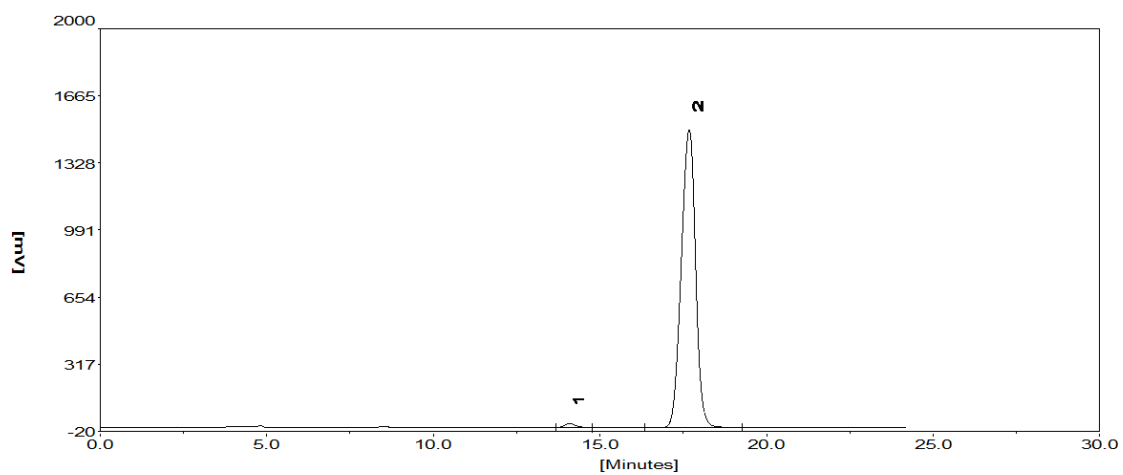

| # | Ret Time (min) | Height (mV) | Area (mV.sec) | Area (%) |
|---|----------------|-------------|---------------|----------|
| 1 | 14.09083       | 19.44       | 425.14        | 0.9473   |
| 2 | 17.67917       | 1494.90     | 44452.08      | 99.0527  |

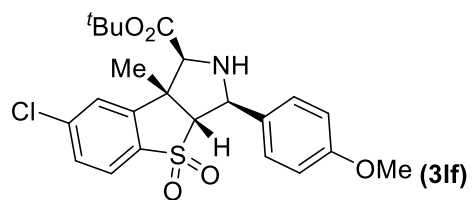

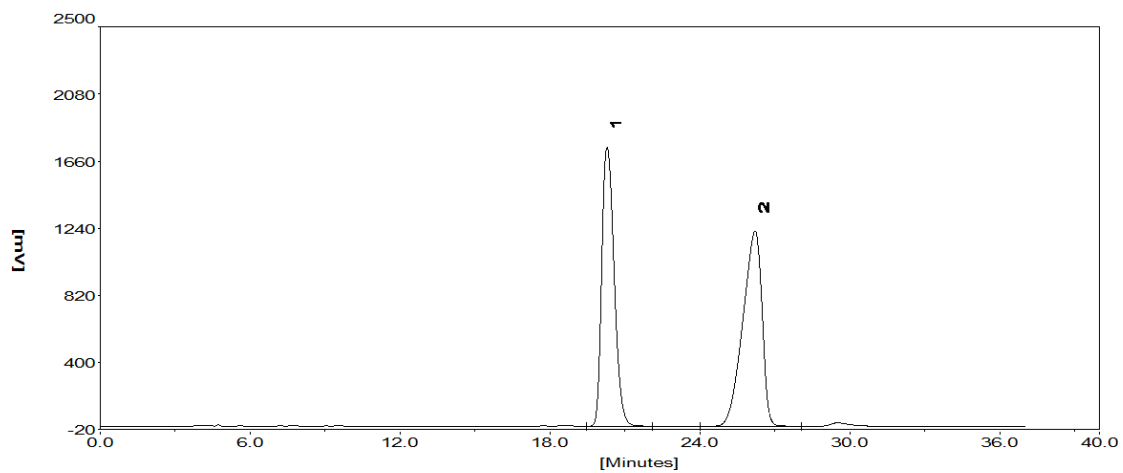

| # | Ret Time (min) | Height (mV) | Area (mV.sec) | Area (%) |
|---|----------------|-------------|---------------|----------|
| 1 | 20.28500       | 1746.08     | 60271.40      | 48.0171  |
| 2 | 26.20500       | 1224.65     | 65249.18      | 51.9829  |

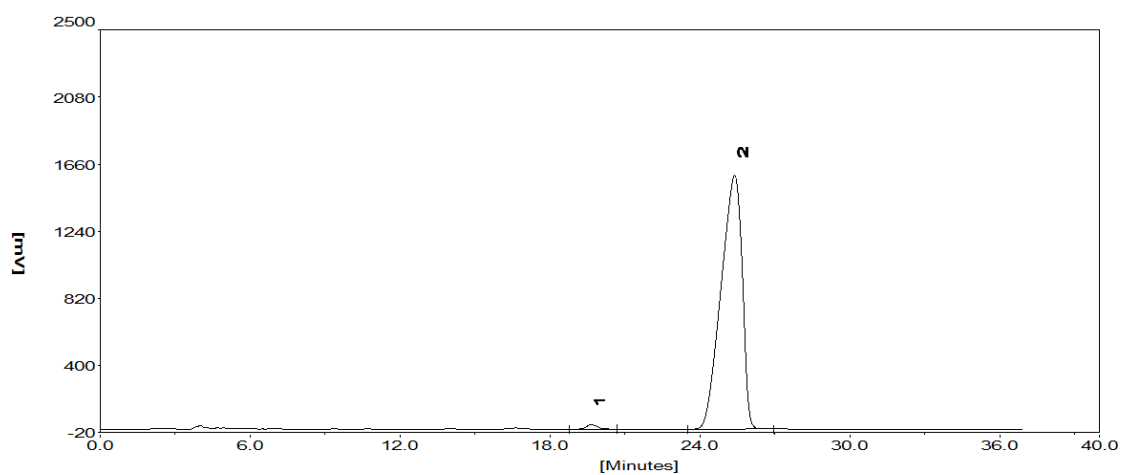

| # | Ret Time (min) | Height (mV) | Area (mV.sec) | Area (%) |
|---|----------------|-------------|---------------|----------|
| 1 | 19.66333       | 27.86       | 841.42        | 0.8933   |
| 2 | 25.39000       | 1589.94     | 93346.36      | 99.1067  |

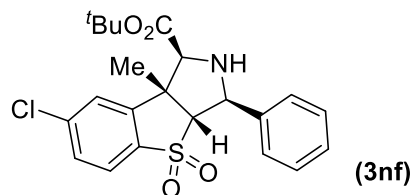

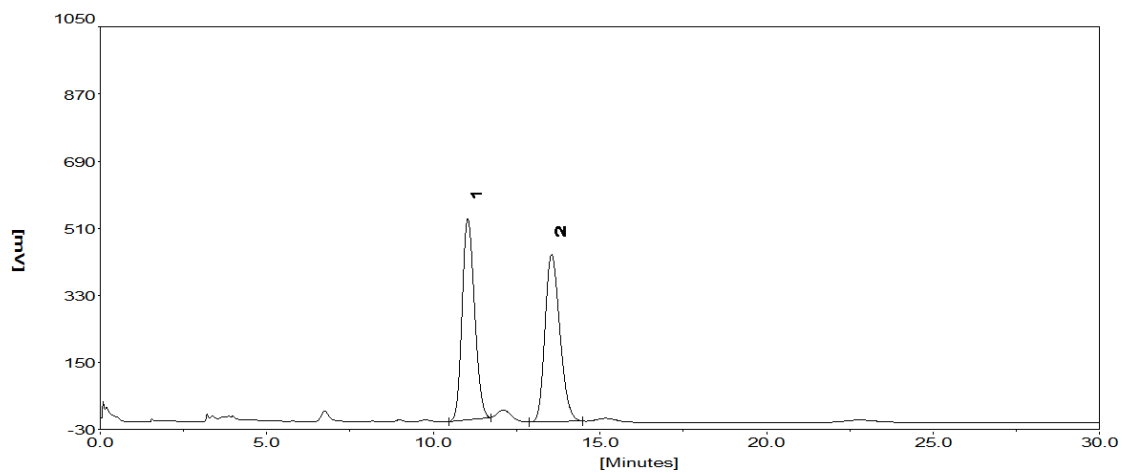

| # | Ret Time (min) | Height (mV) | Area (mV.sec) | Area (%) |
|---|----------------|-------------|---------------|----------|
| 1 | 11.03250       | 540.55      | 13978.10      | 50.1506  |
| 2 | 13.54750       | 448.42      | 13894.13      | 49.8494  |

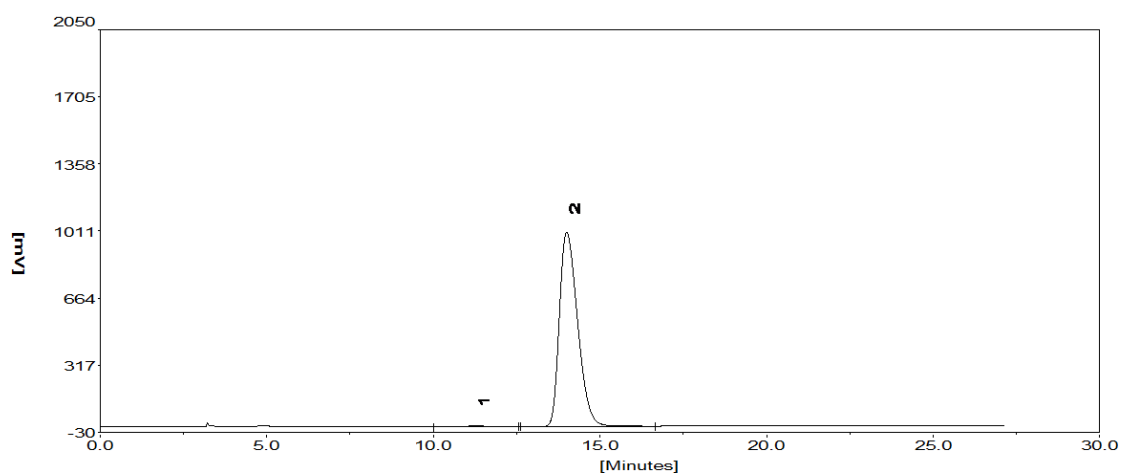

| # | Ret Time (min) | Height (mV) | Area (mV.sec) | Area (%) |
|---|----------------|-------------|---------------|----------|
| 1 | 11.27333       | 7.55        | 228.87        | 0.5960   |
| 2 | 14.00333       | 1004.56     | 38173.87      | 99.4040  |

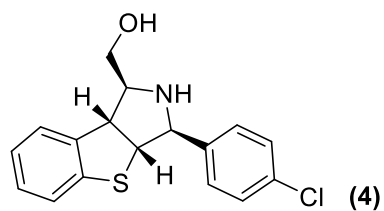



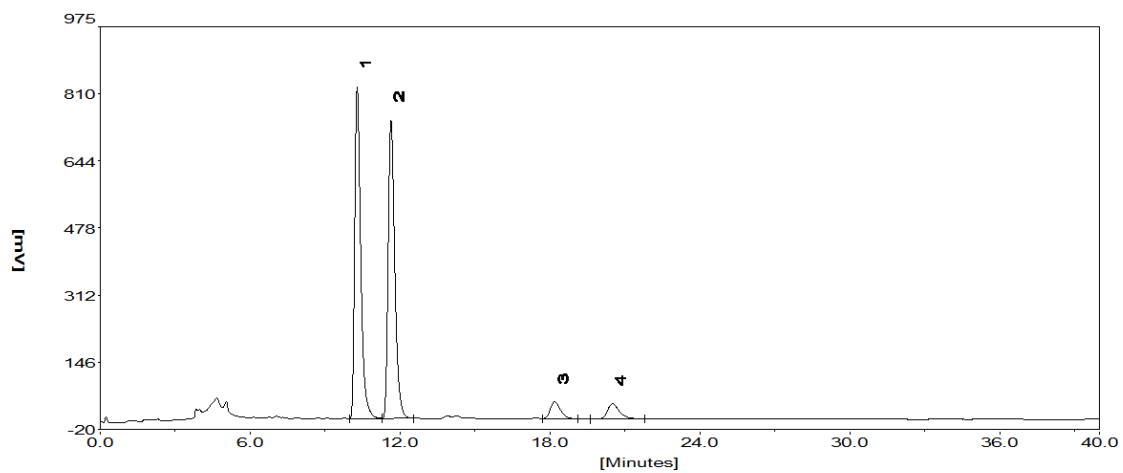

| # | Ret Time (min) | Height (mV) | Area (mV.sec) | Area (%) |
|---|----------------|-------------|---------------|----------|
| 1 | 10.28417       | 820.38      | 13802.99      | 46.2436  |
| 2 | 11.63750       | 737.52      | 13613.68      | 45.6094  |
| 3 | 18.18750       | 42.07       | 1167.18       | 3.9104   |
| 4 | 20.50333       | 37.57       | 1264.58       | 4.2366   |

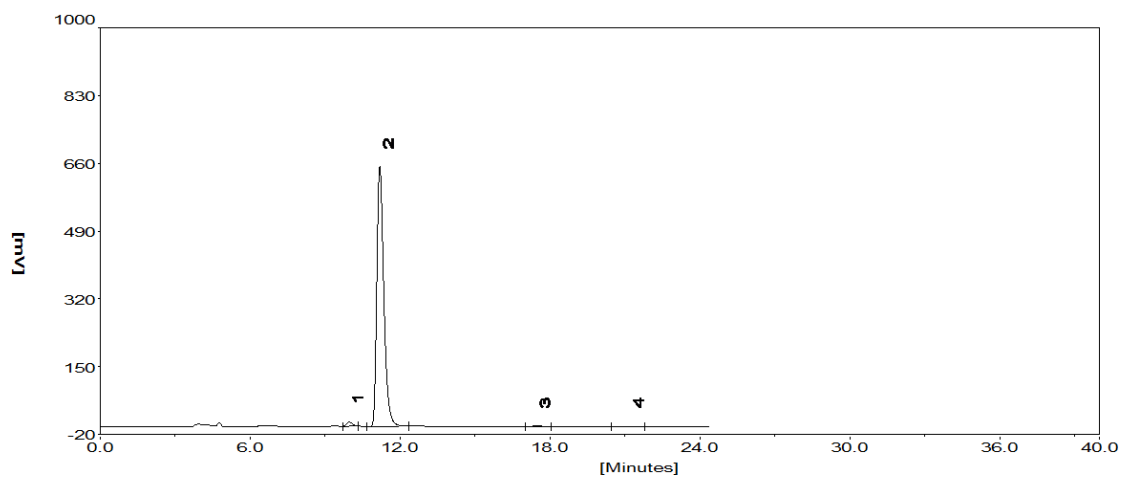

| # | Ret Time (min) | Height (mV) | Area (mV.sec) | Area (%) |
|---|----------------|-------------|---------------|----------|
| 1 | 9.95917        | 10.38       | 132.80        | 1.0372   |
| 2 | 11.19000       | 652.44      | 12632.75      | 98.6642  |
| 3 | 17.88000       | 1.15        | 32.88         | 0.2560   |
| 4 | 21.23083       | 0.13        | 5.47          | 0.0426   |

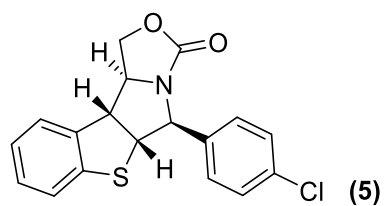

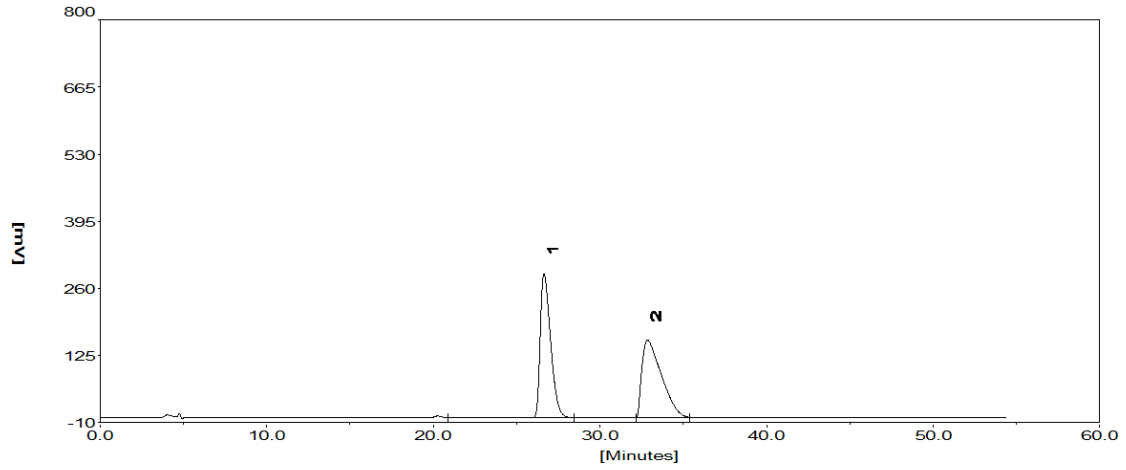

| # | Ret Time (min) | Height (mV) | Area (mV.sec) | Area (%) |
|---|----------------|-------------|---------------|----------|
| 1 | 26.64333       | 289.72      | 12451.59      | 49.7744  |
| 2 | 32.85000       | 155.94      | 12564.44      | 50.2256  |

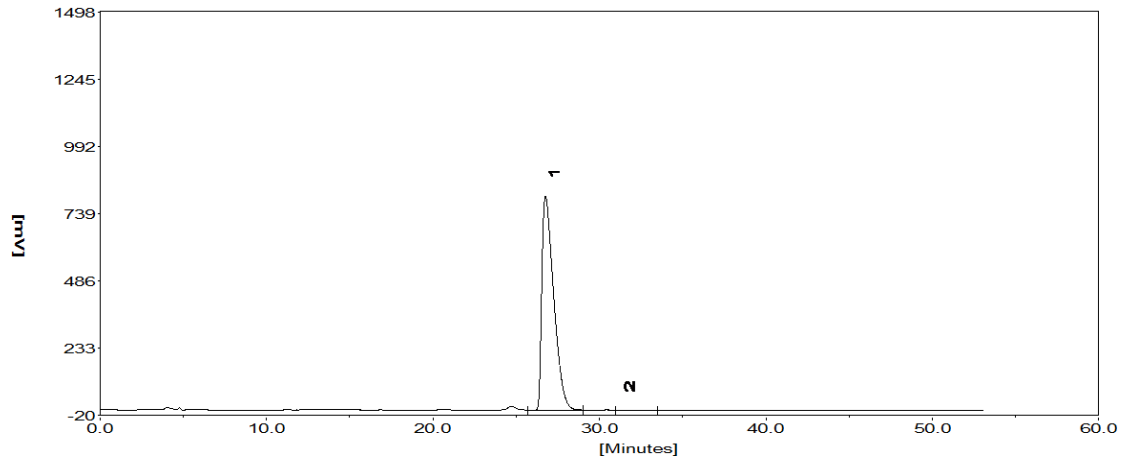

| # | Ret Time (min) | Height (mV) | Area (mV.sec) | Area (%) |
|---|----------------|-------------|---------------|----------|
| 1 | 26.75917       | 804.56      | 39810.90      | 99.9933  |
| 2 | 32.61000       | 0.11        | 2.67          | 0.0067   |

## 9. $^1\text{H}$ NMR and $^{13}\text{C}$ NMR spectra

$^1\text{H}$  NMR spectrum of compound **3aa** ( $\text{CDCl}_3$ )

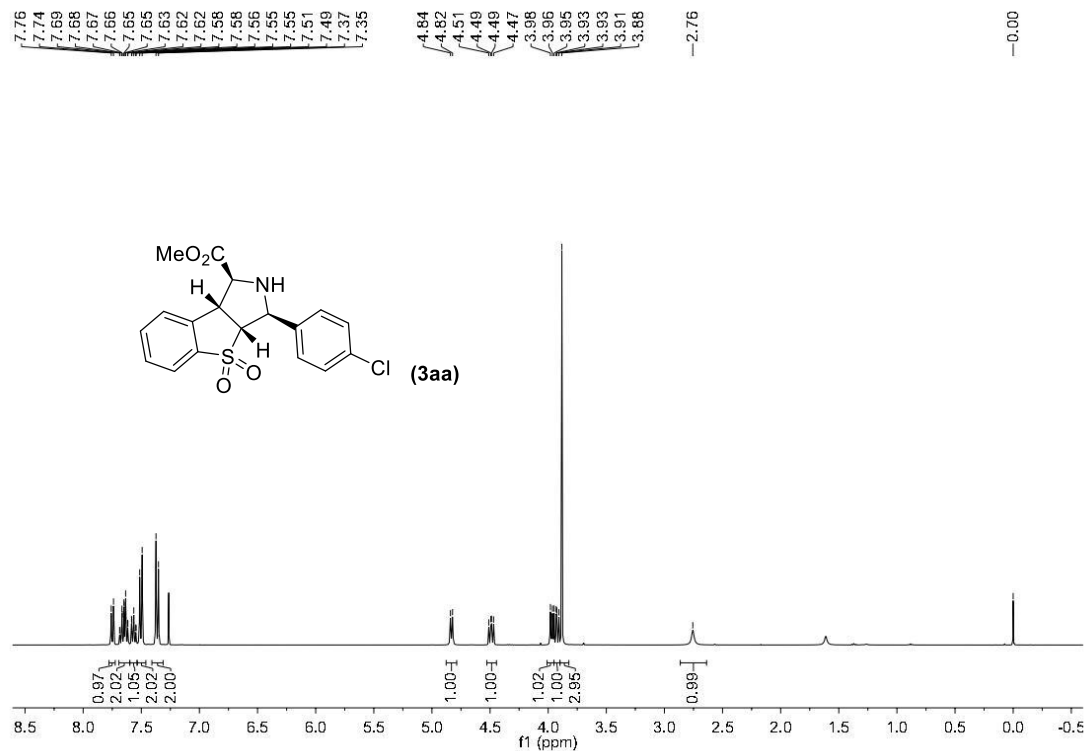

$^{13}\text{C}$  NMR spectrum of compound **3aa** ( $\text{CDCl}_3$ )

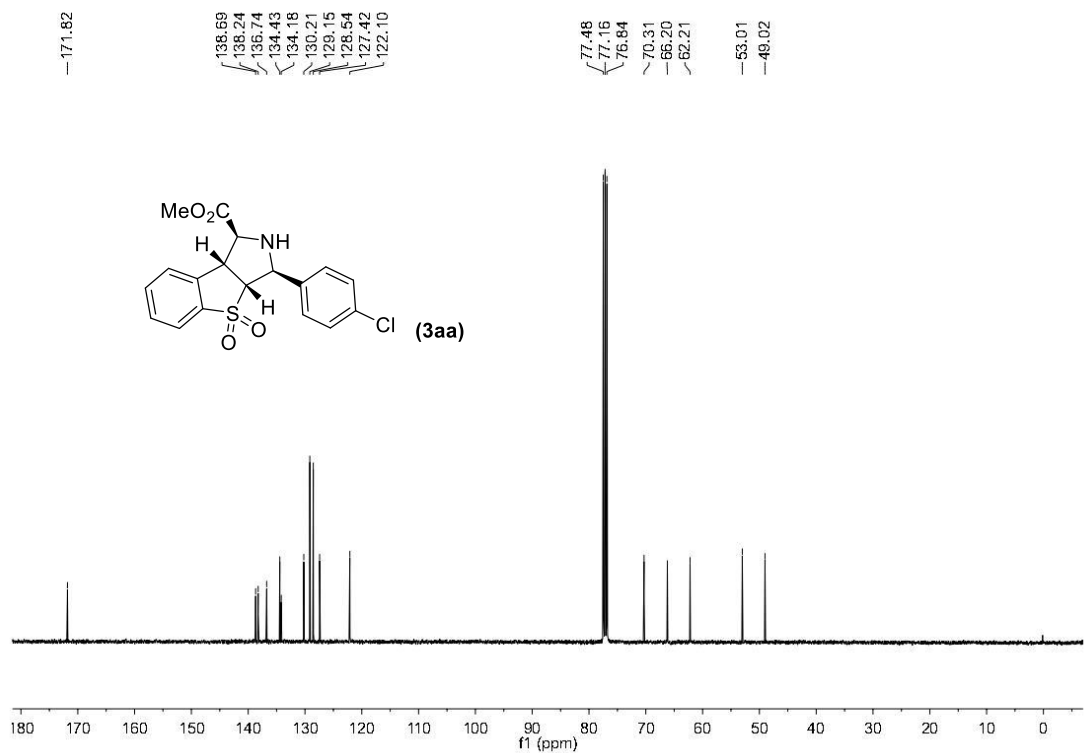

$^1\text{H}$  NMR spectrum of compound **3ba** ( $\text{CDCl}_3$ )

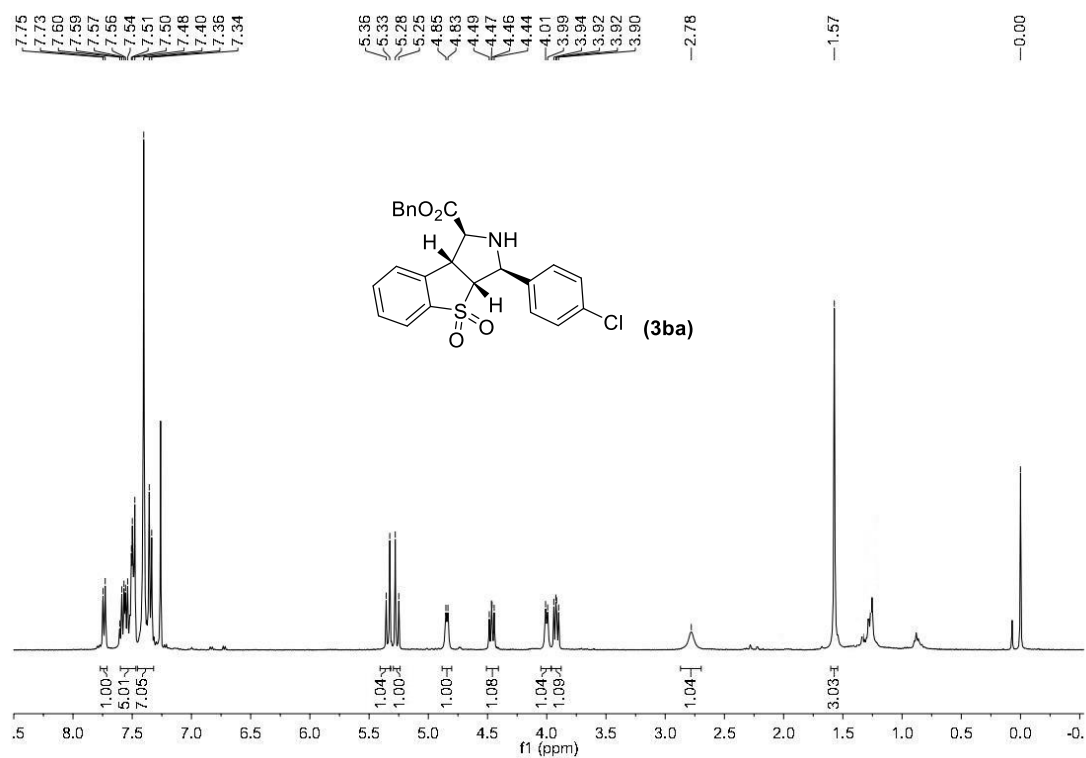

$^{13}\text{C}$  NMR spectrum of compound **3ba** ( $\text{CDCl}_3$ )

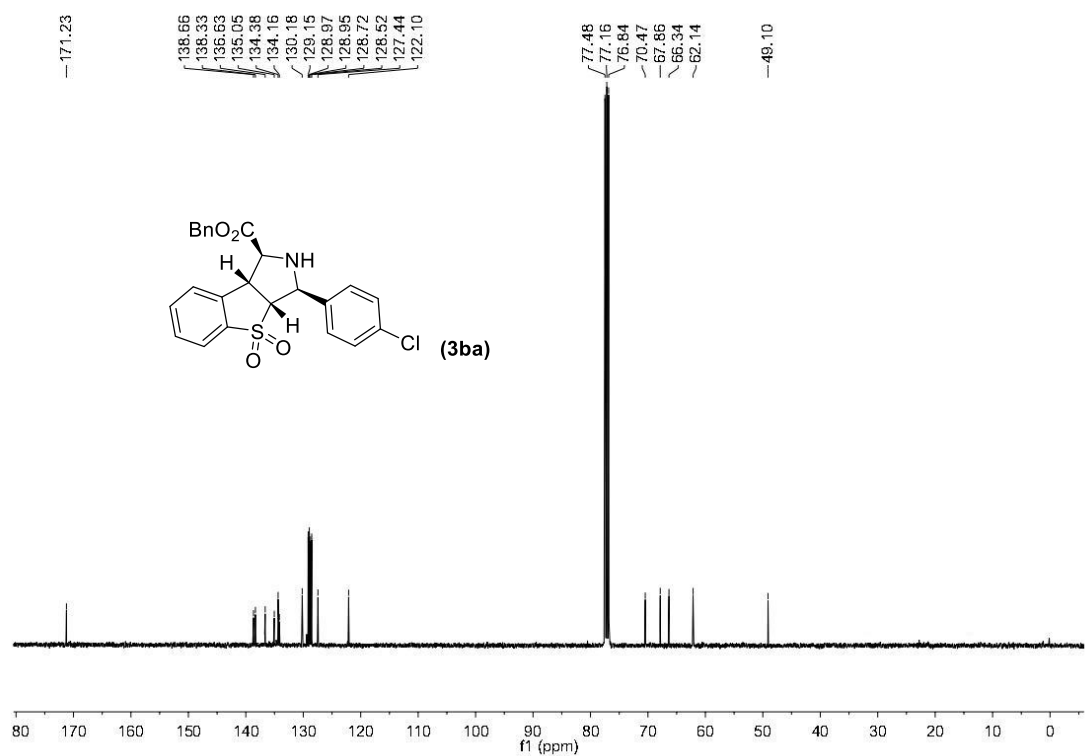

$^1\text{H}$  NMR spectrum of compound **3ca** ( $\text{CDCl}_3$ )

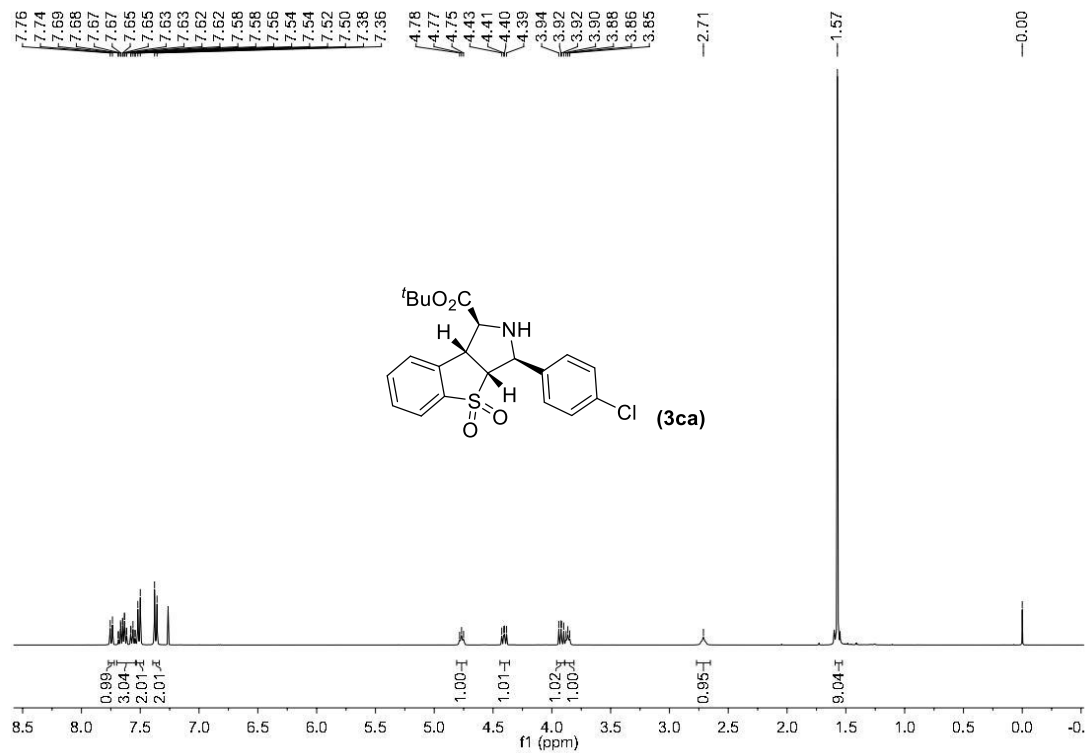

**<sup>13</sup>C NMR spectrum of compound 3ca (CDCl<sub>3</sub>)**

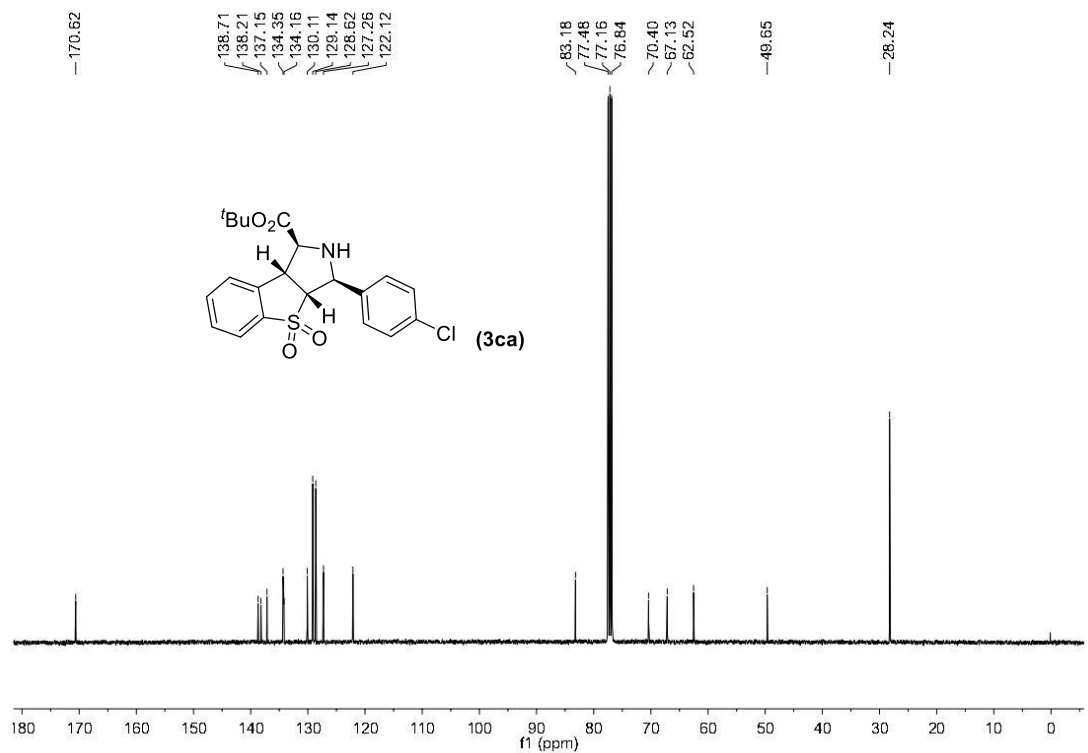

**<sup>1</sup>H NMR spectrum of compound 3da (CDCl<sub>3</sub>)**

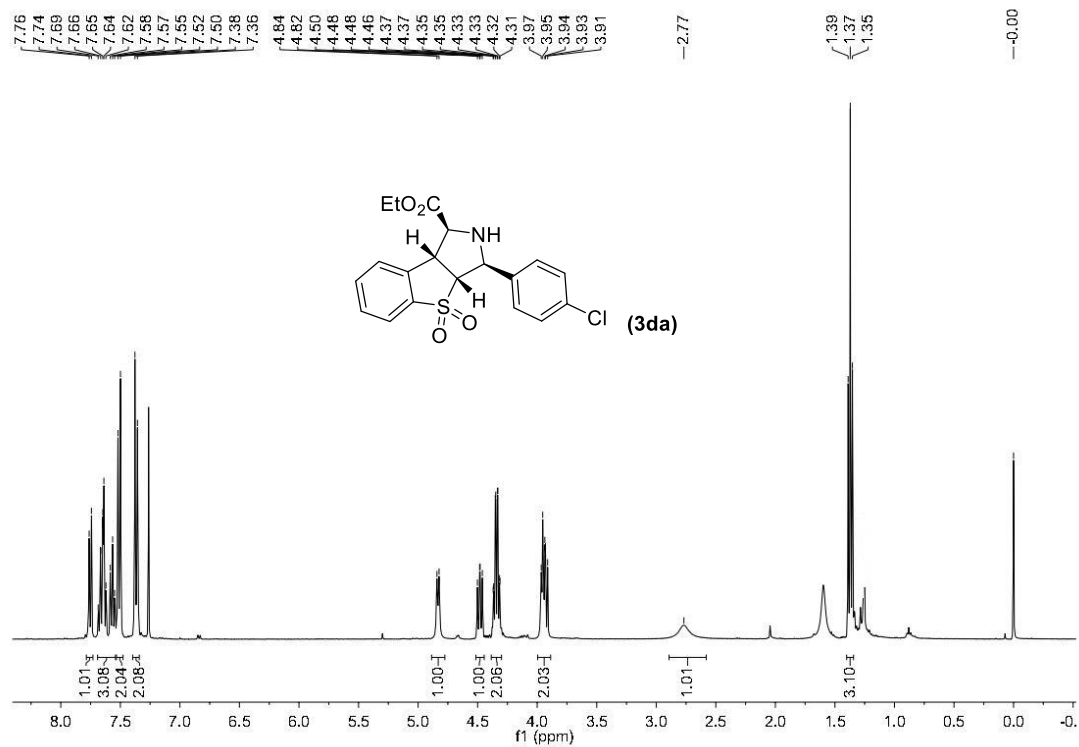

<sup>13</sup>C NMR spectrum of compound 3da (CDCl<sub>3</sub>)

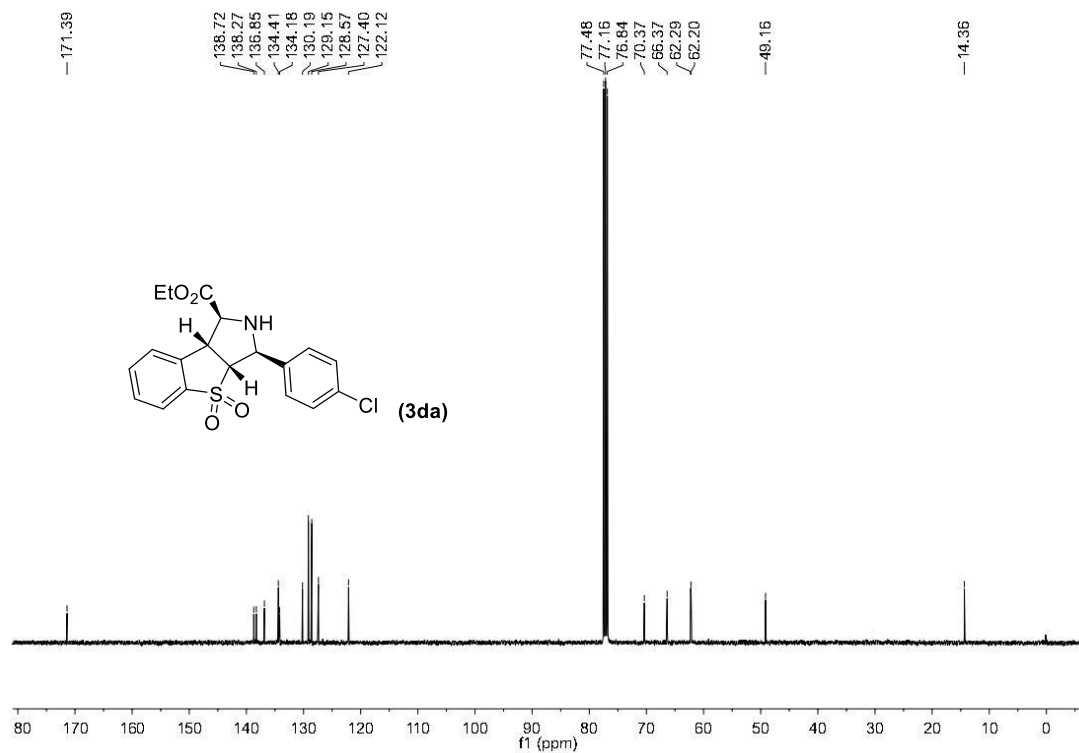

<sup>1</sup>H NMR spectrum of compound 3ea (CDCl<sub>3</sub>)

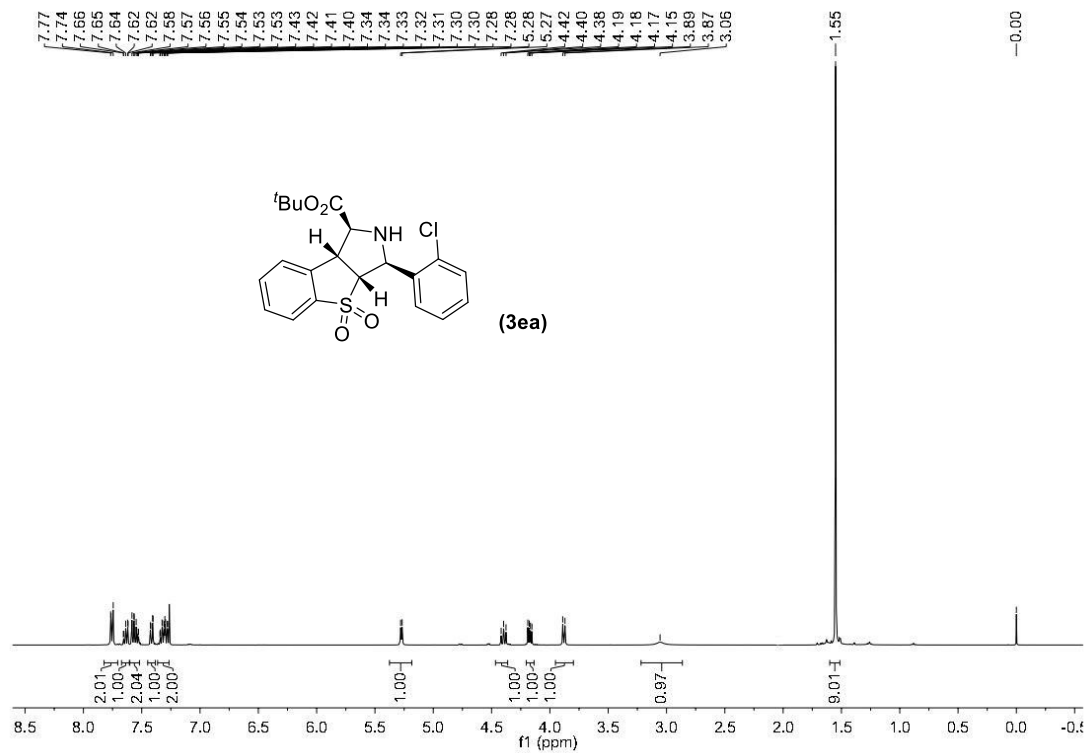

**<sup>13</sup>C NMR spectrum of compound 3ea (CDCl<sub>3</sub>)**

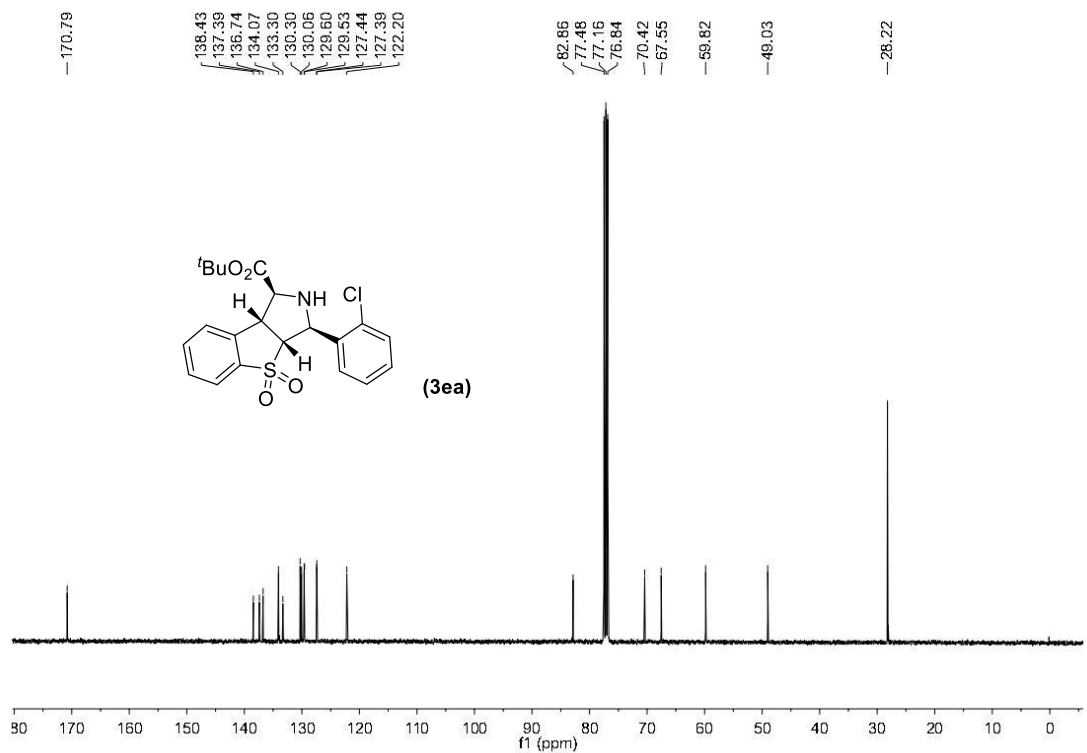

**<sup>1</sup>H NMR spectrum of compound 3fa (CDCl<sub>3</sub>)**

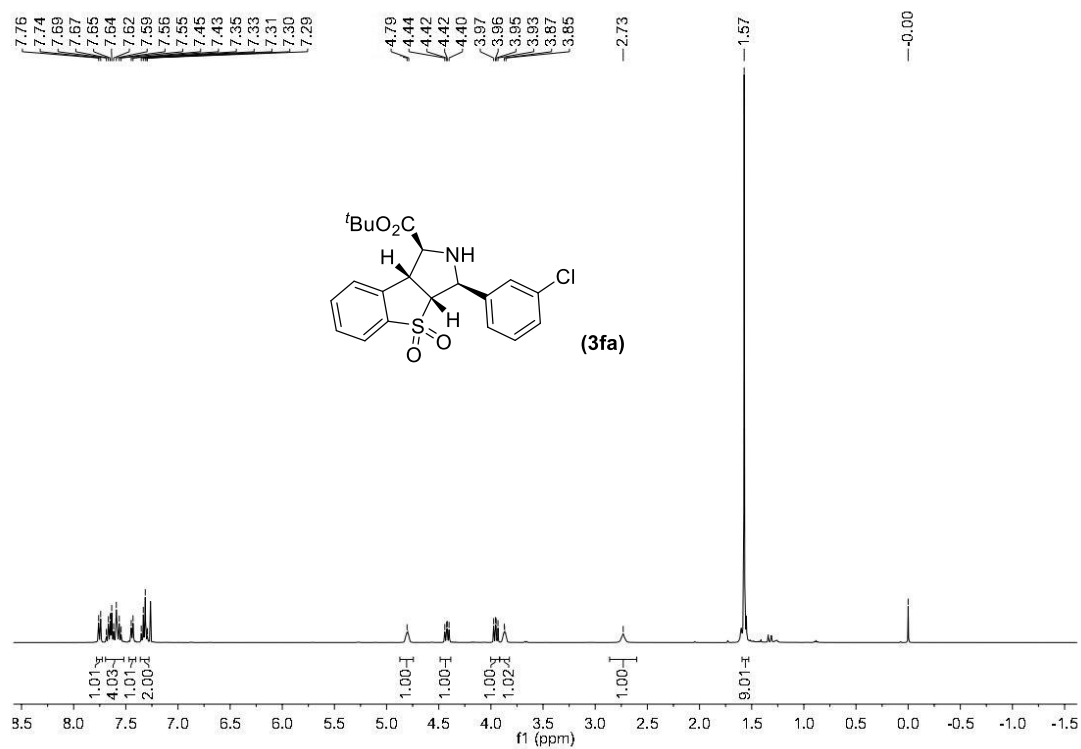

**<sup>13</sup>C NMR spectrum of compound **3fa** (CDCl<sub>3</sub>)**

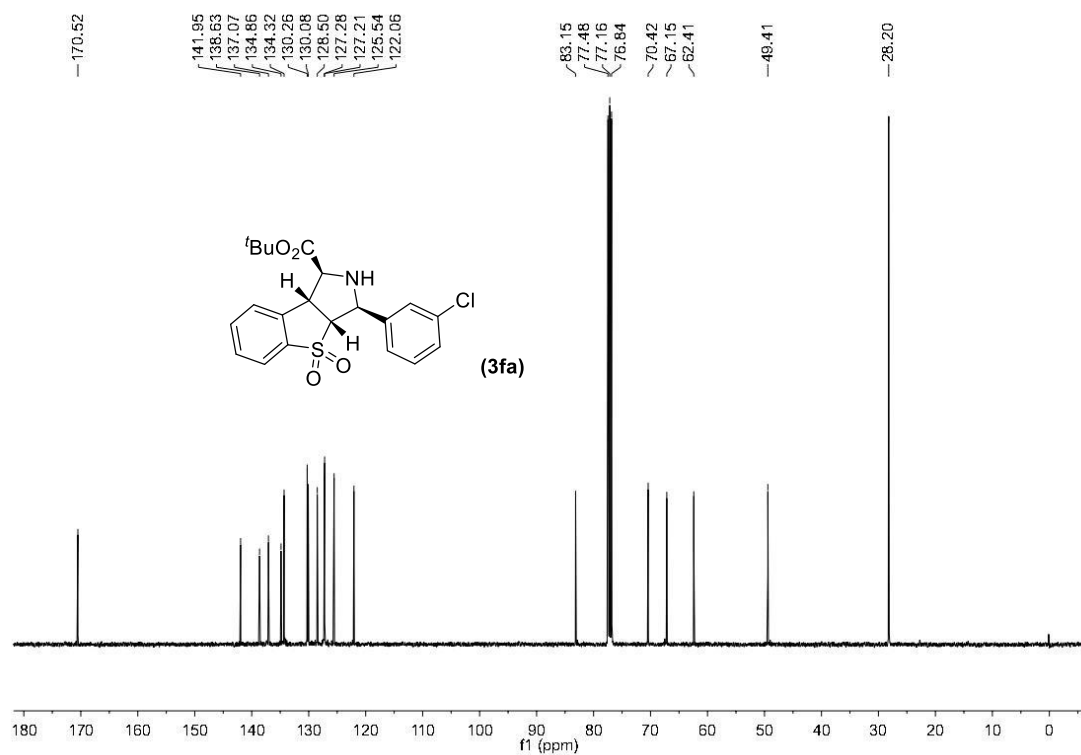

**<sup>1</sup>H NMR spectrum of compound **3ga** (CDCl<sub>3</sub>)**



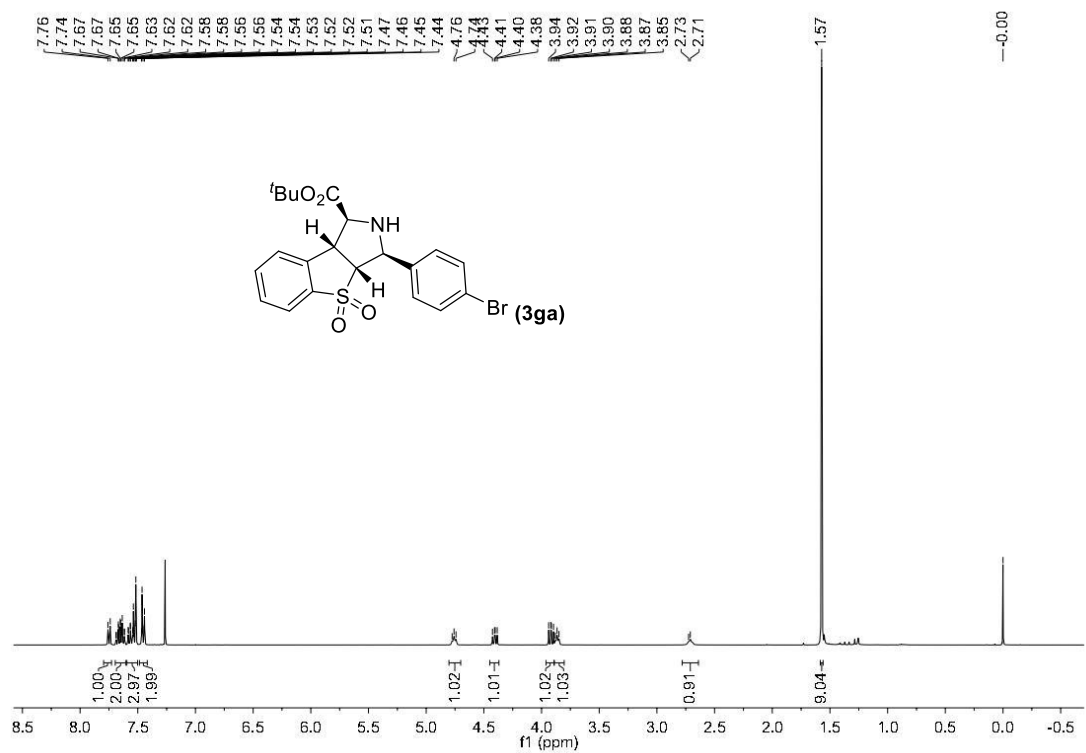

**<sup>13</sup>C NMR spectrum of compound **3ga** (CDCl<sub>3</sub>)**

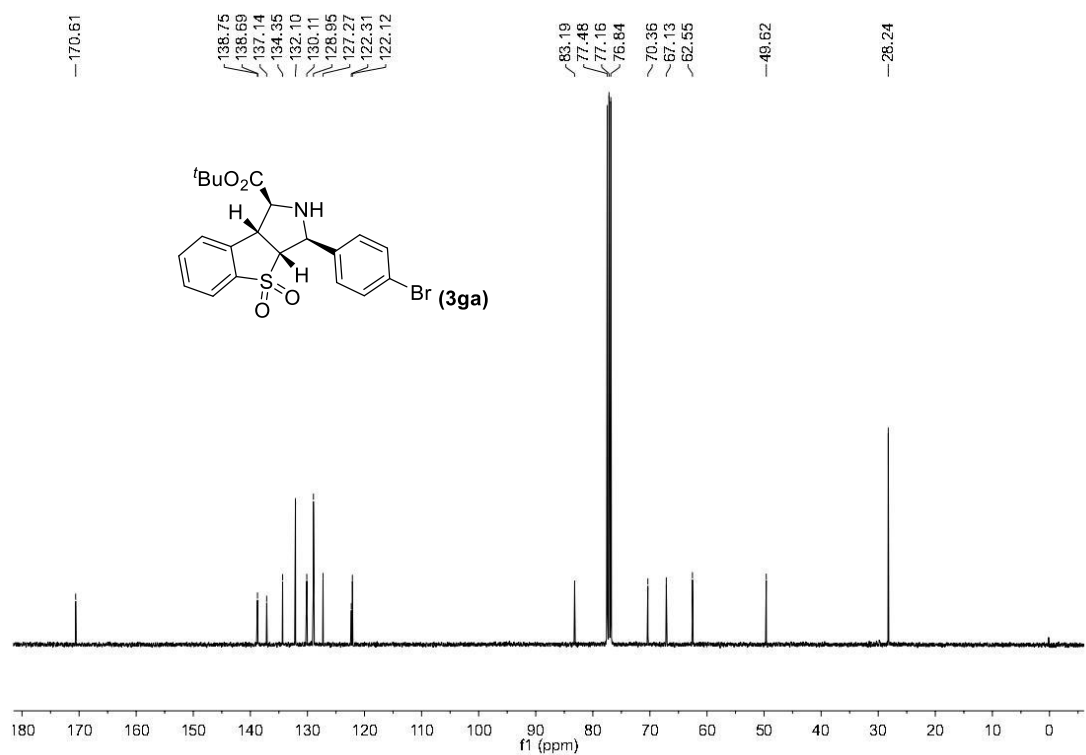

**<sup>1</sup>H NMR spectrum of compound **3ha** (CDCl<sub>3</sub>)**

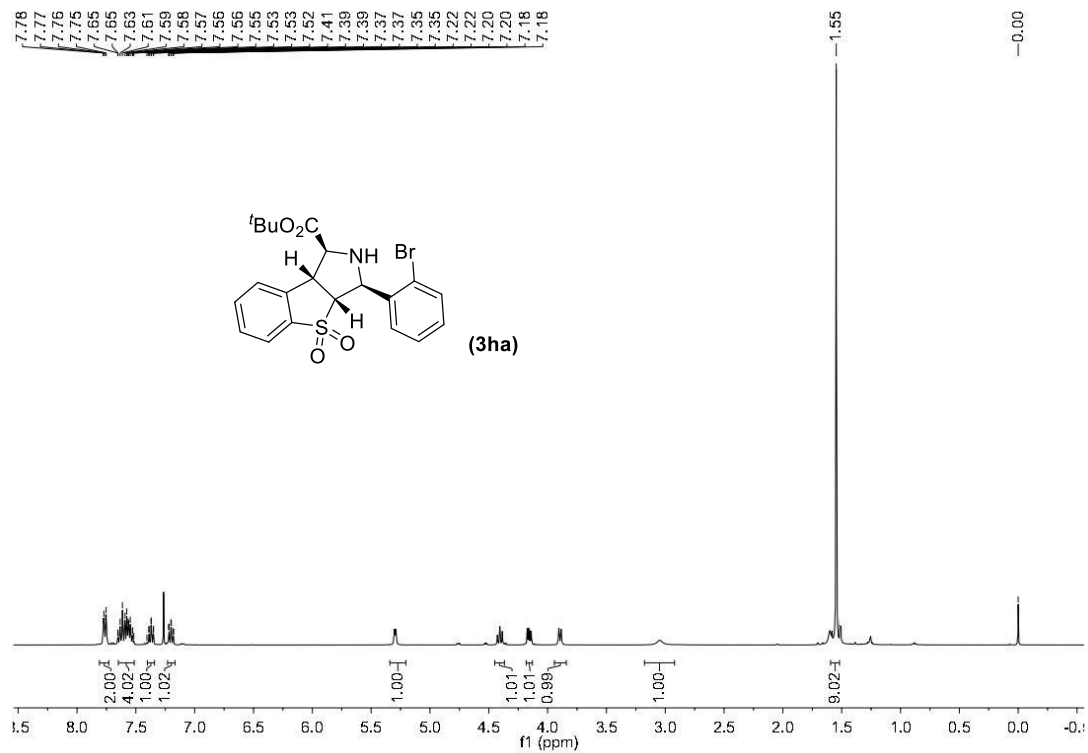

**<sup>13</sup>C NMR spectrum of compound **3ha** (CDCl<sub>3</sub>)**

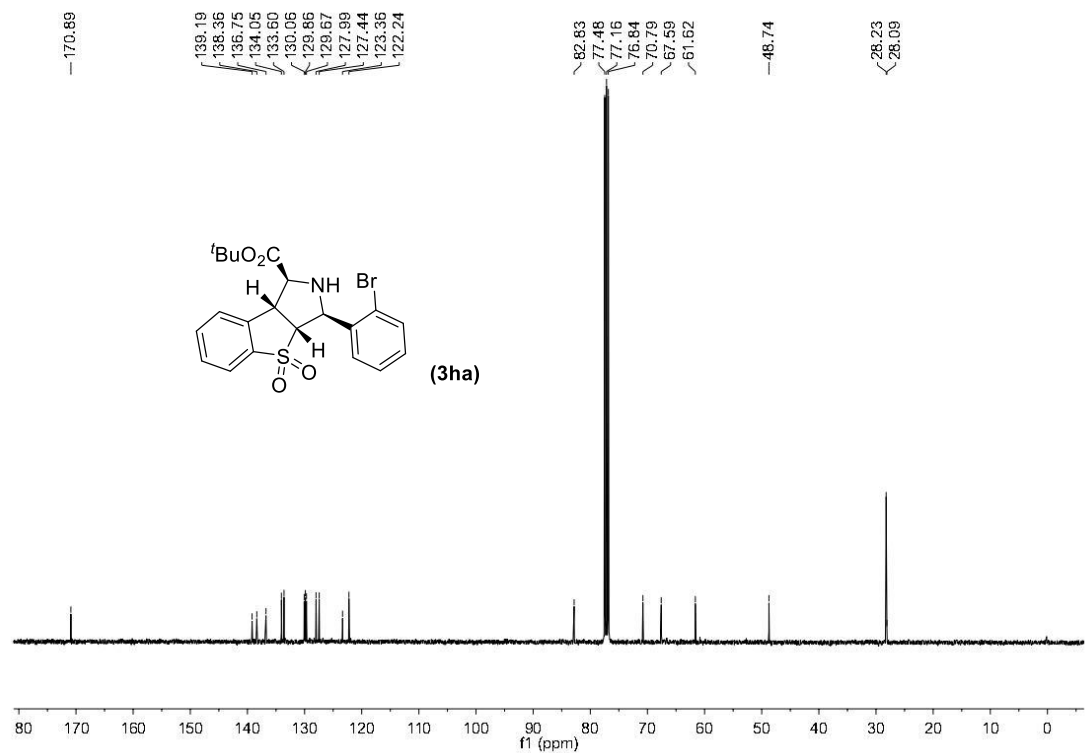

**<sup>1</sup>H NMR spectrum of compound **3ia** (CDCl<sub>3</sub>)**

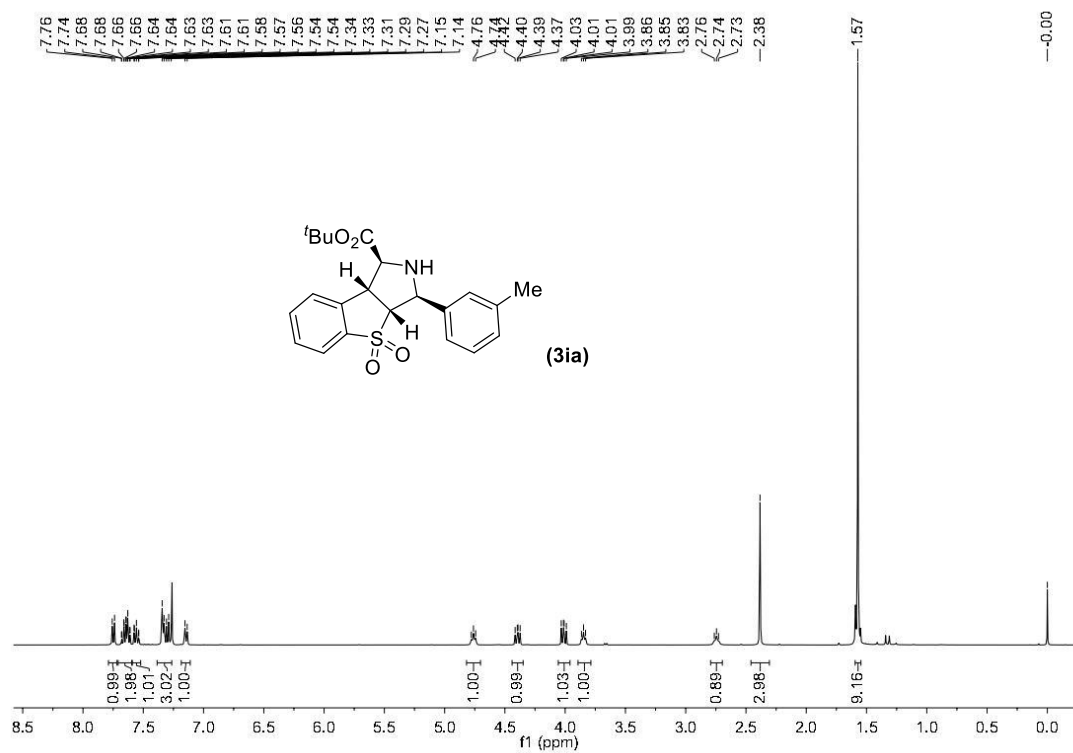

**<sup>13</sup>C NMR spectrum of compound **3ia** (CDCl<sub>3</sub>)**

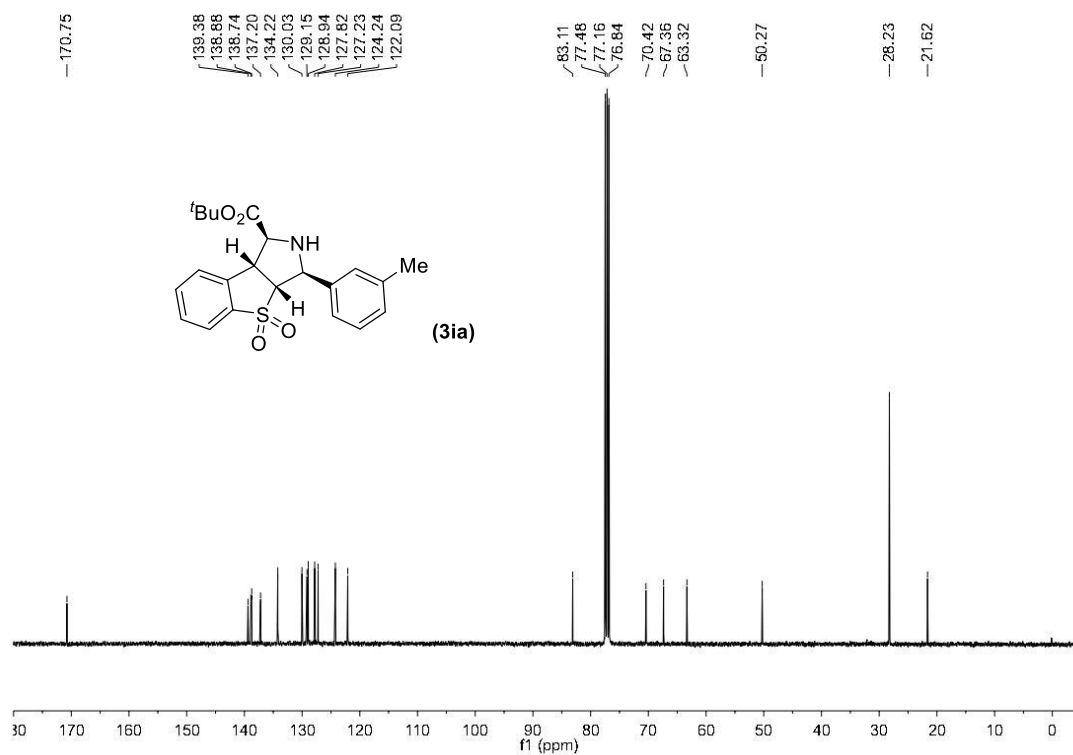

**<sup>1</sup>H NMR spectrum of compound **3ja** (CDCl<sub>3</sub>)**

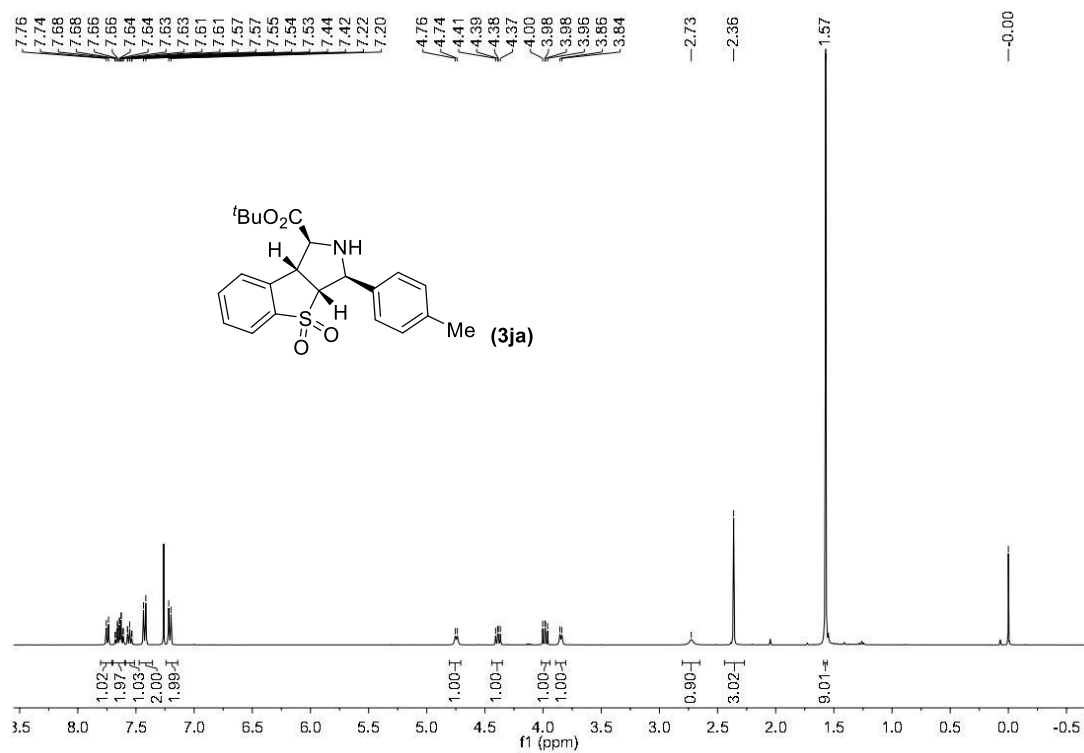

**<sup>13</sup>C NMR spectrum of compound 3ja (CDCl<sub>3</sub>)**

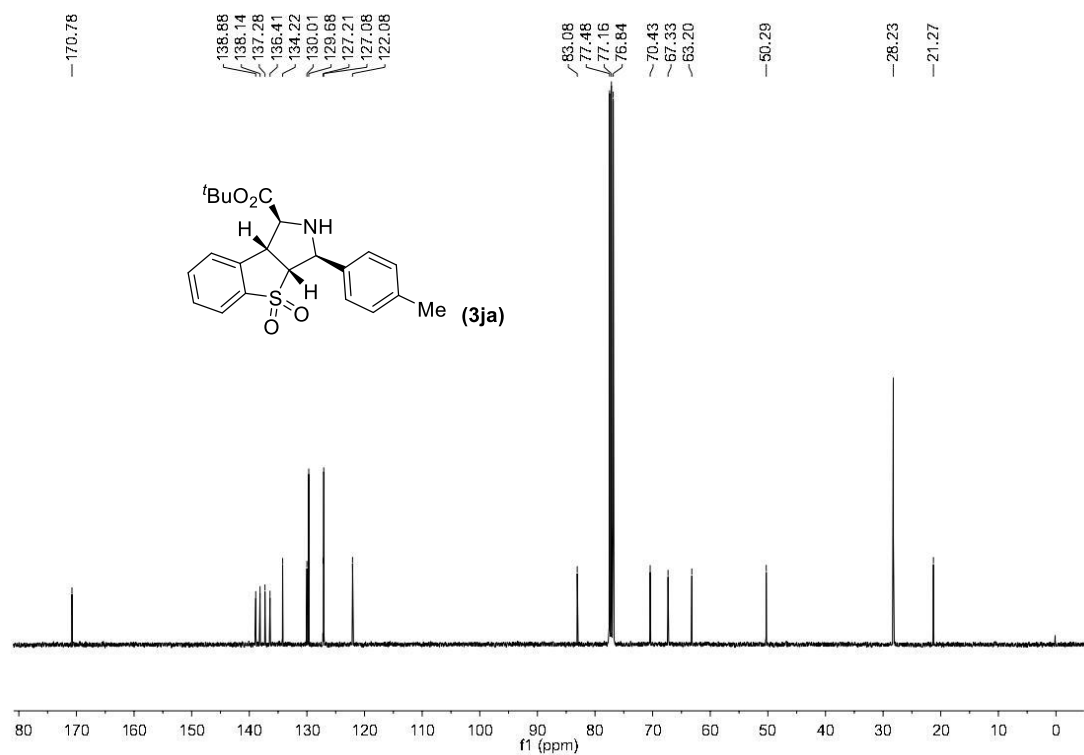

**<sup>1</sup>H NMR spectrum of compound 3ka (CDCl<sub>3</sub>)**

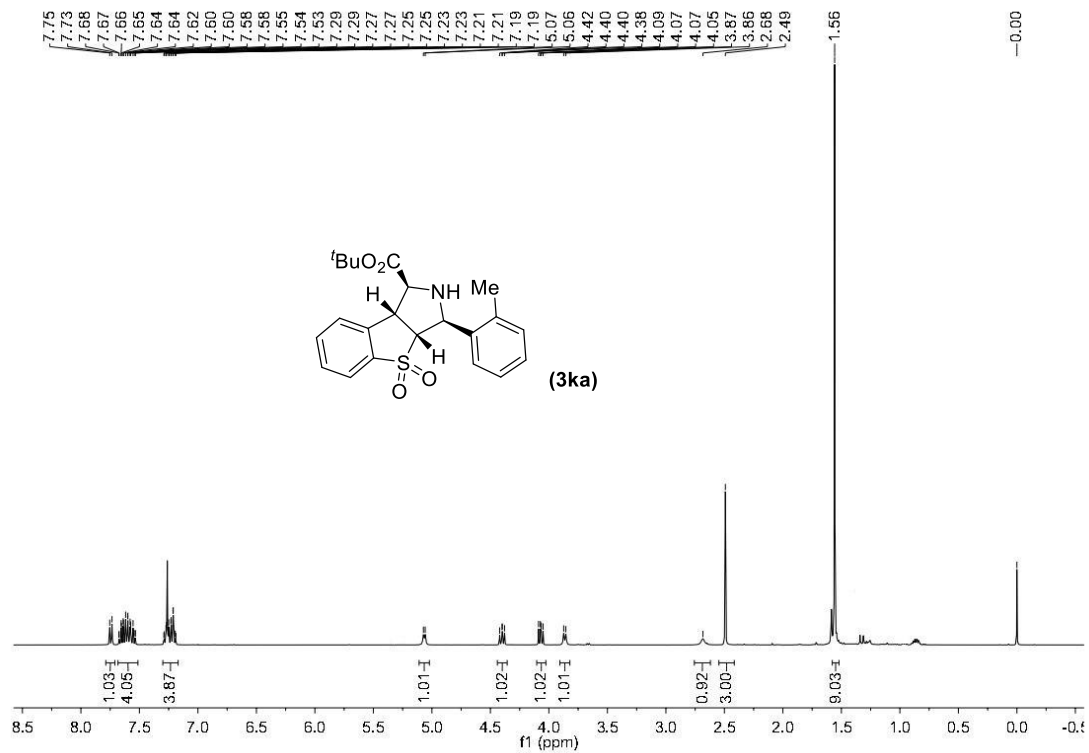

**<sup>13</sup>C NMR spectrum of compound **3ka** (CDCl<sub>3</sub>)**

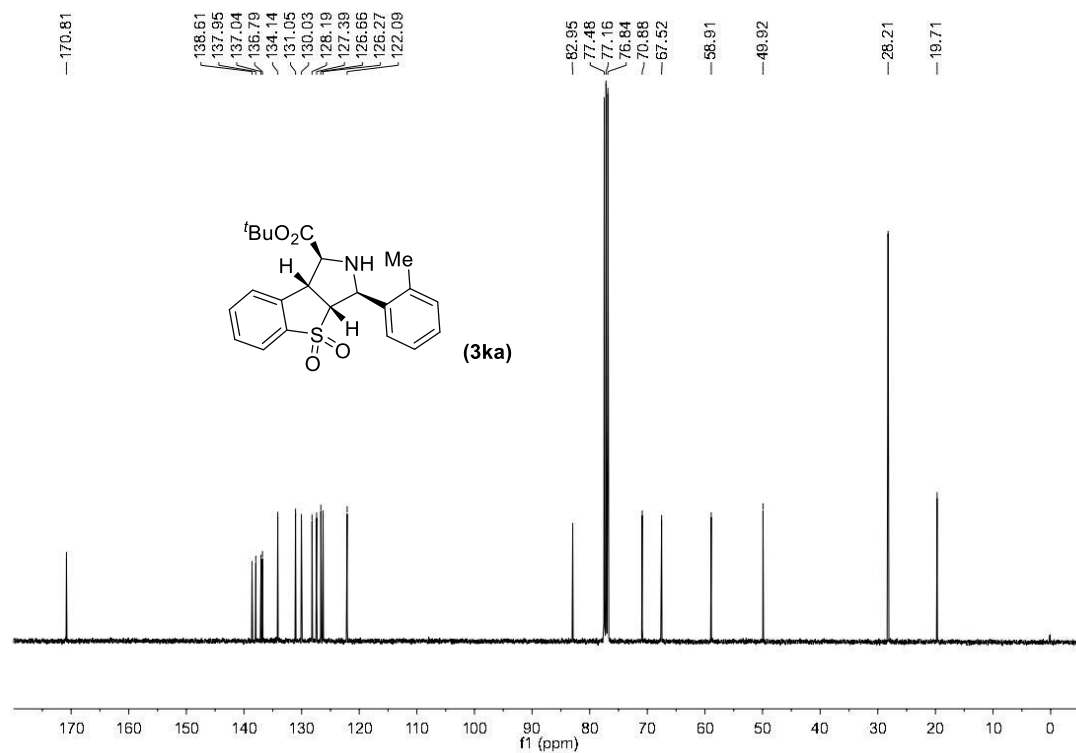

**<sup>1</sup>H NMR spectrum of compound **3la** (CDCl<sub>3</sub>)**

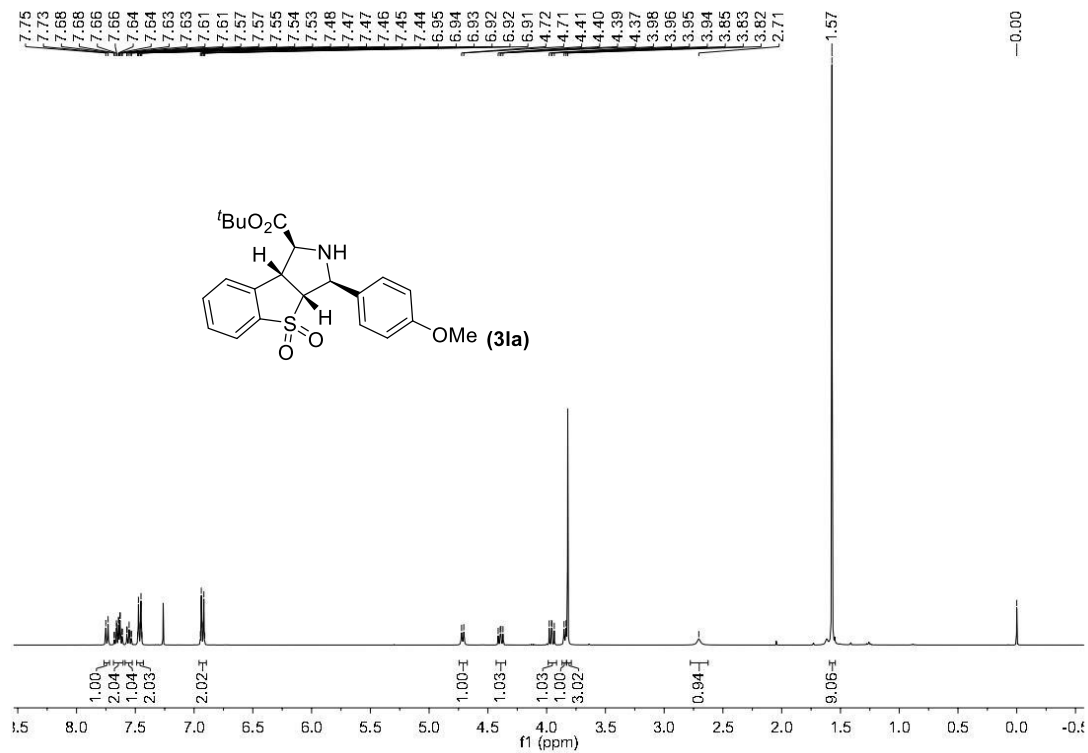

**<sup>13</sup>C NMR spectrum of compound **31a** (CDCl<sub>3</sub>)**

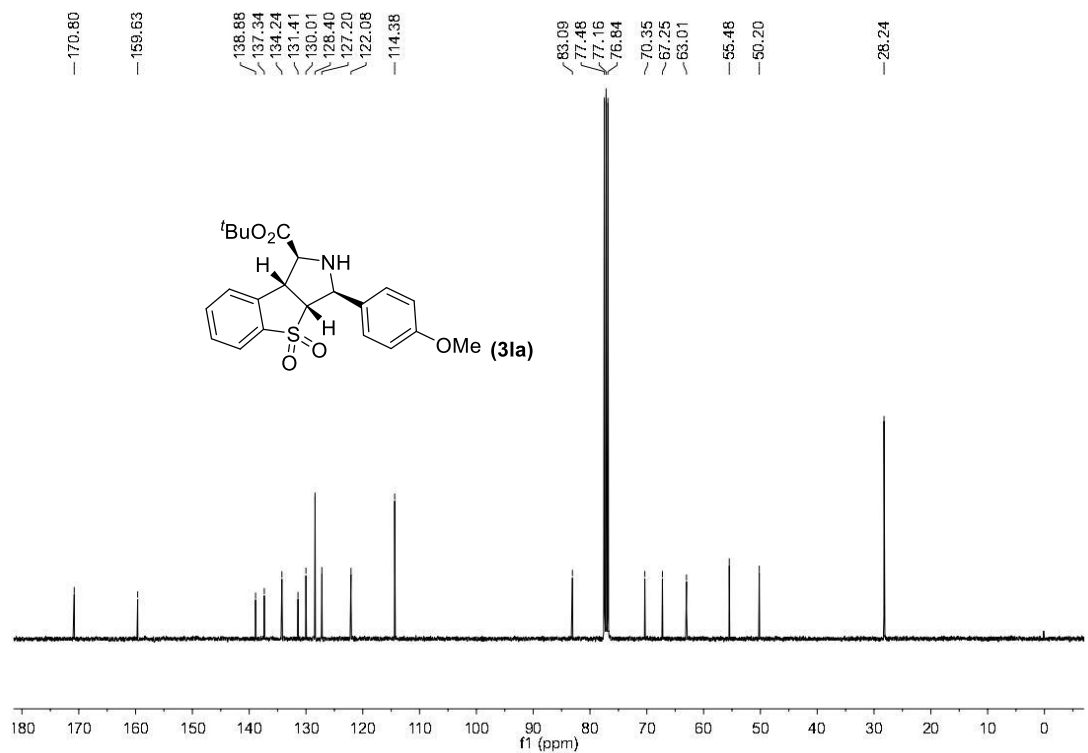

**<sup>1</sup>H NMR spectrum of compound **3ma** (CDCl<sub>3</sub>)**

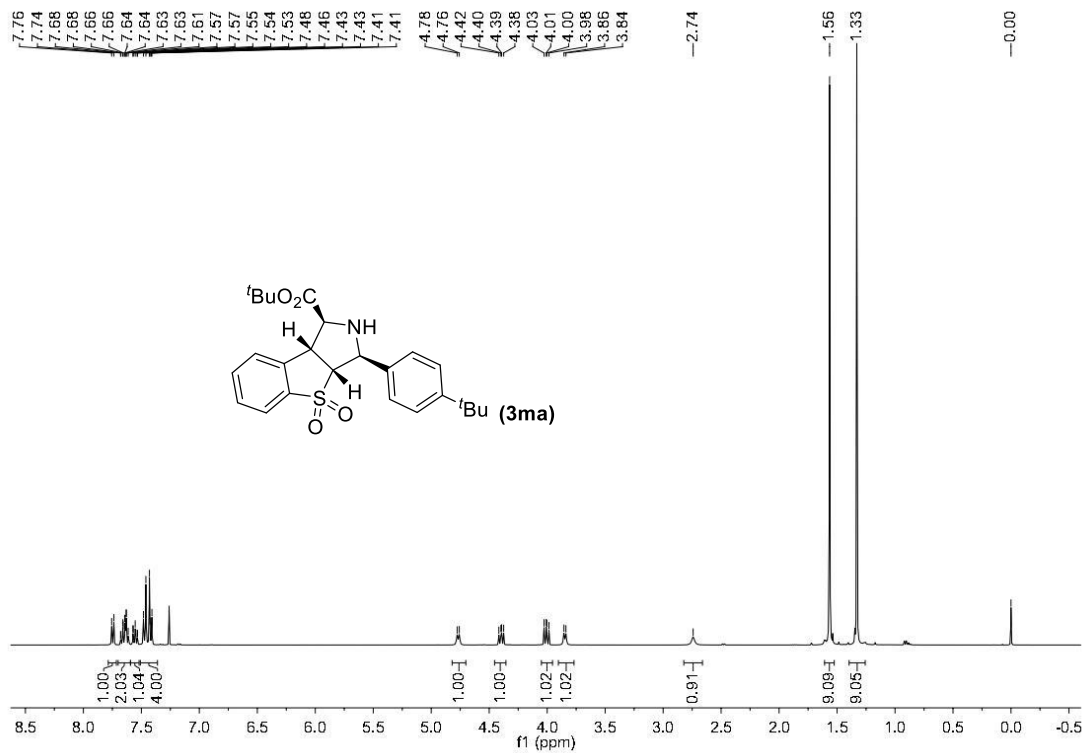

**<sup>13</sup>C NMR spectrum of compound **3ma** (CDCl<sub>3</sub>)**

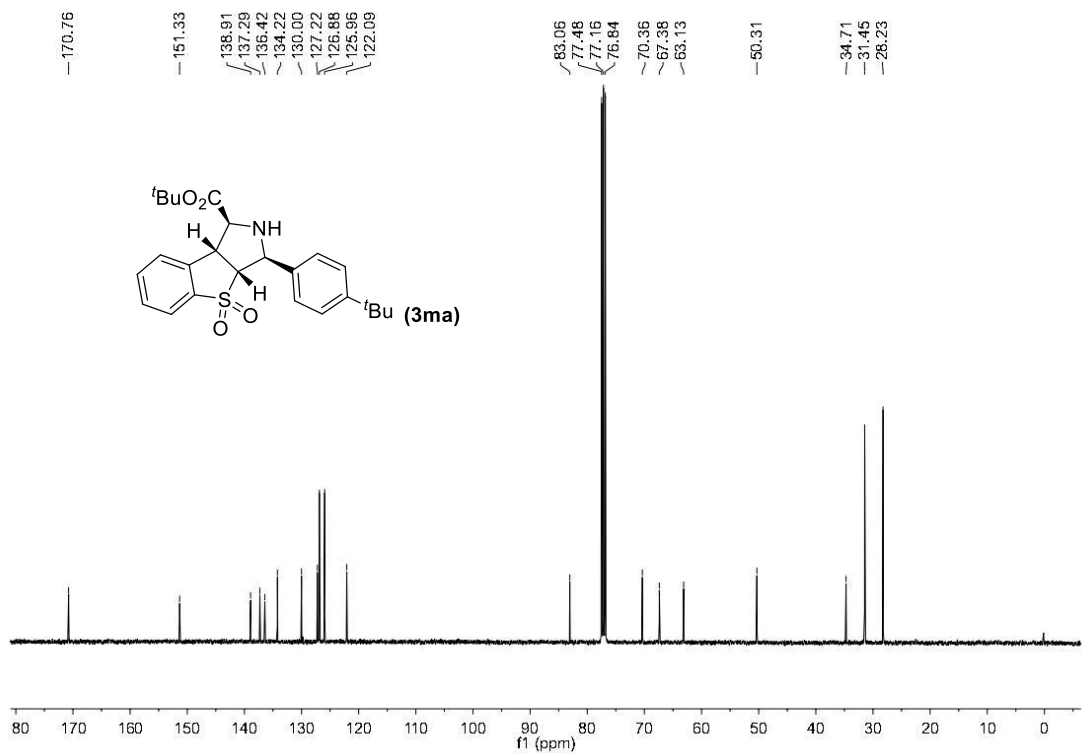

**<sup>1</sup>H NMR spectrum of compound **3na** (CDCl<sub>3</sub>)**

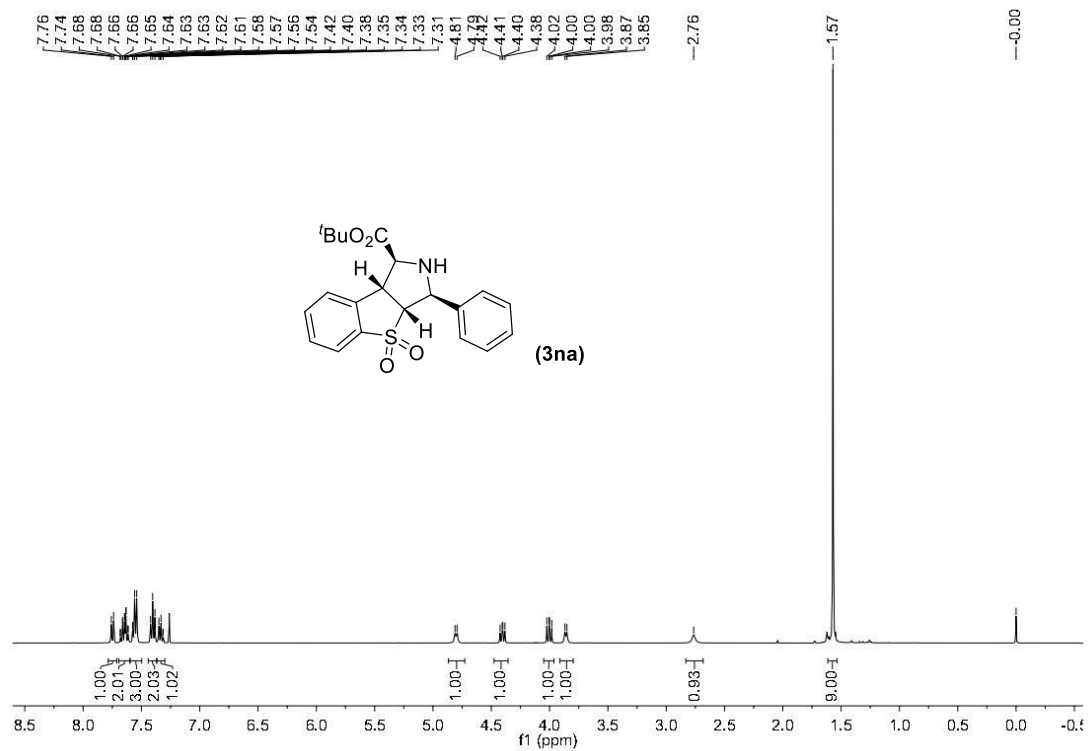

**<sup>13</sup>C NMR spectrum of compound 3na (CDCl<sub>3</sub>)**

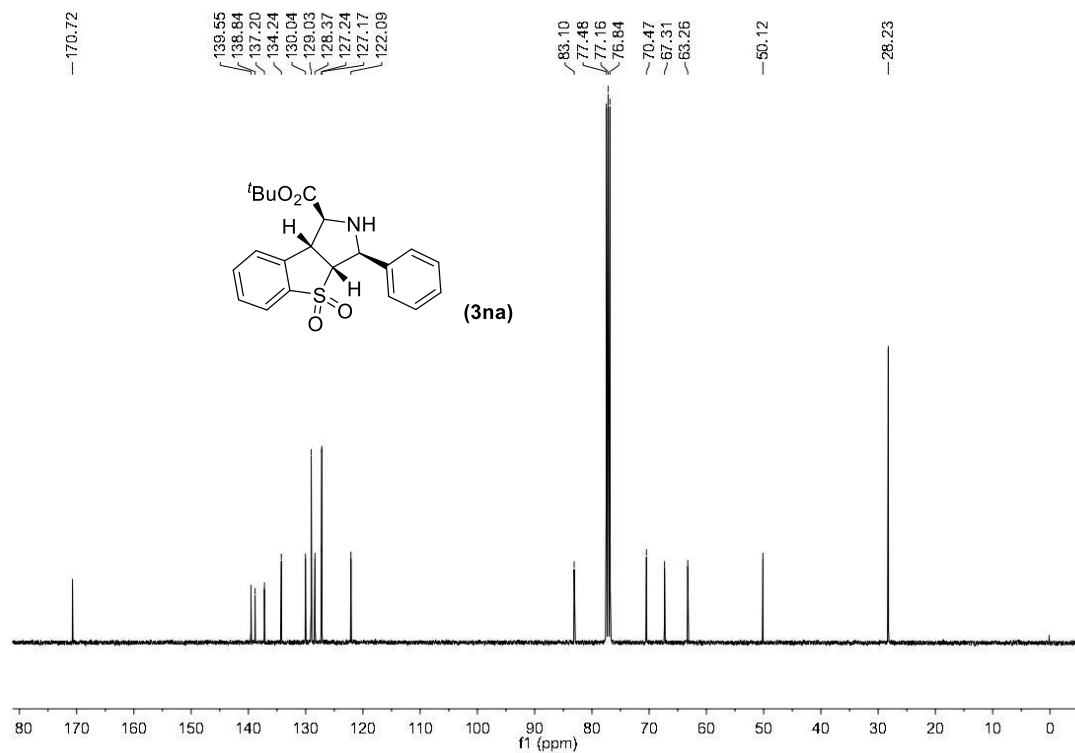

**<sup>1</sup>H NMR spectrum of compound 3oa (CDCl<sub>3</sub>)**



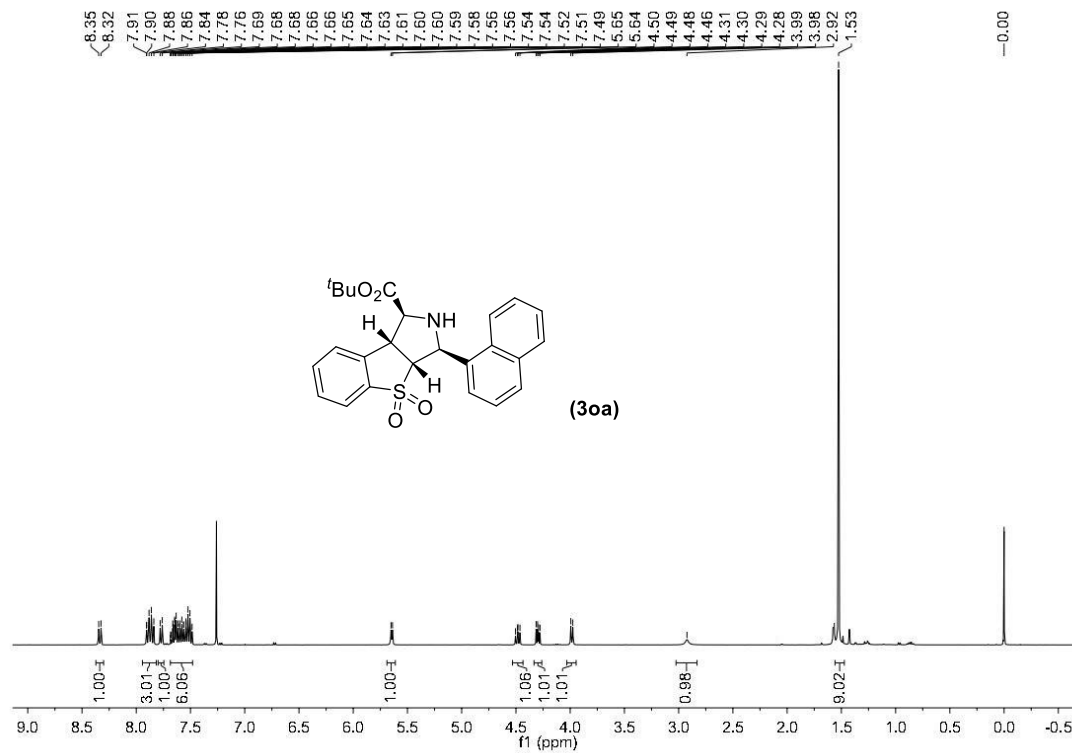

**<sup>13</sup>C NMR spectrum of compound 30a (CDCl<sub>3</sub>)**

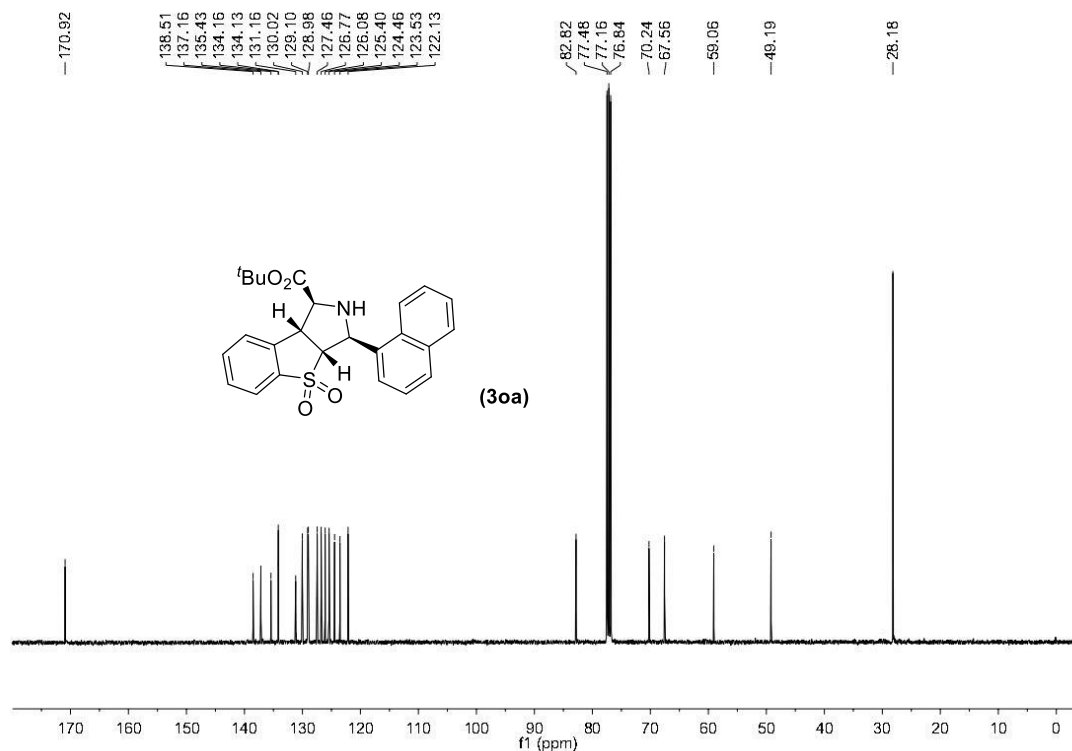

**<sup>1</sup>H NMR spectrum of compound 30a (CDCl<sub>3</sub>)**

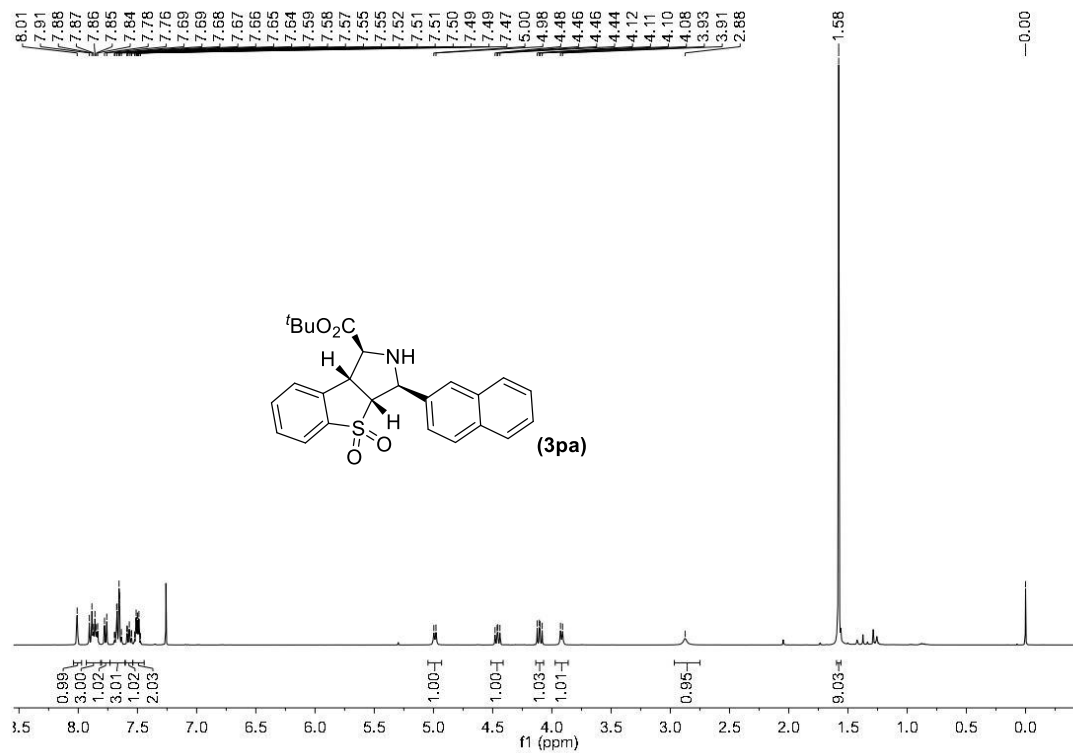

**<sup>13</sup>C NMR spectrum of compound **3pa** (CDCl<sub>3</sub>)**

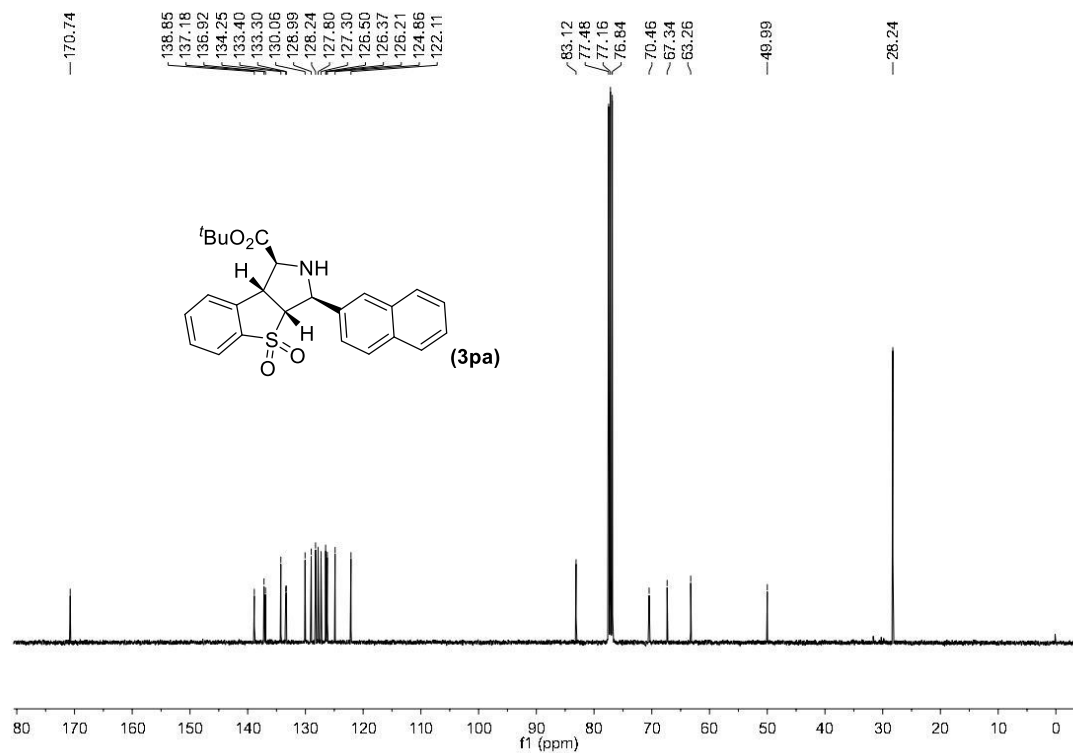

**<sup>1</sup>H NMR spectrum of compound **3qa** (CDCl<sub>3</sub>)**

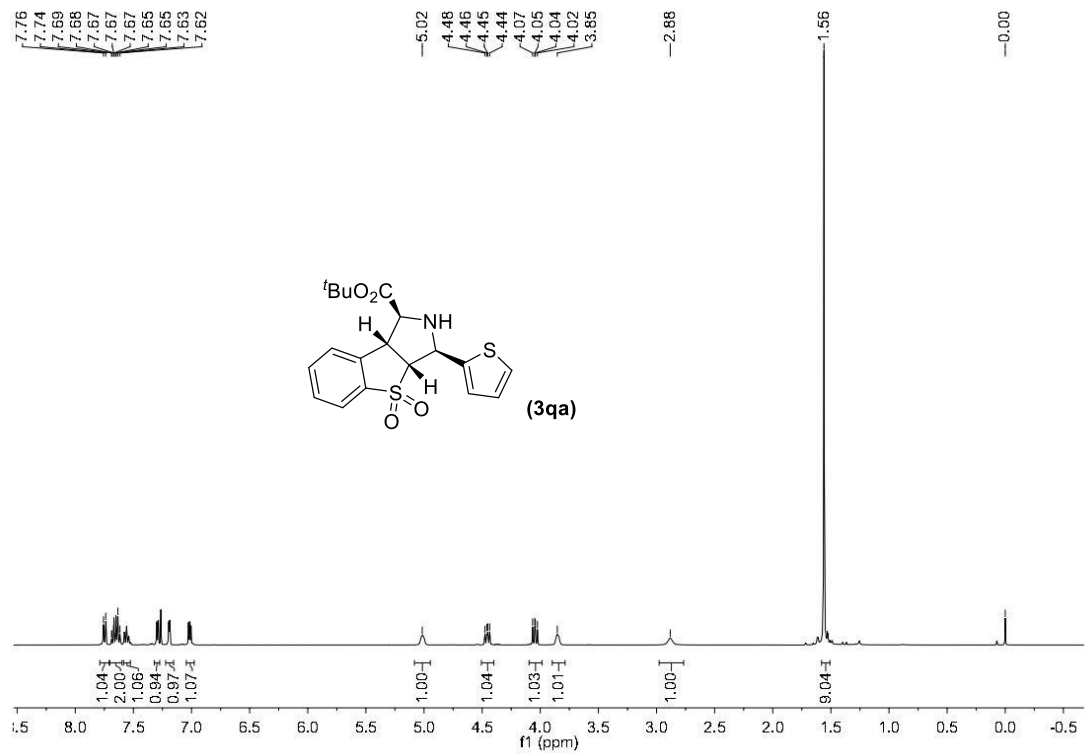

**<sup>13</sup>C NMR spectrum of compound 3qa (CDCl<sub>3</sub>)**

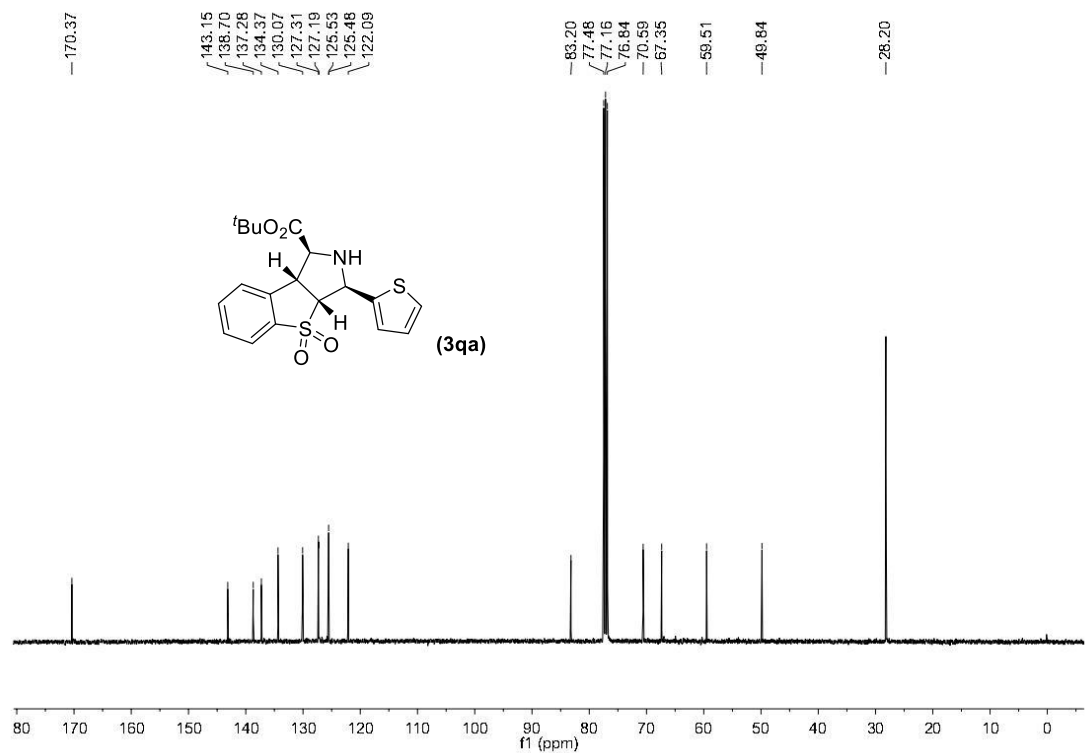

**<sup>1</sup>H NMR spectrum of compound 3ra (CDCl<sub>3</sub>)**

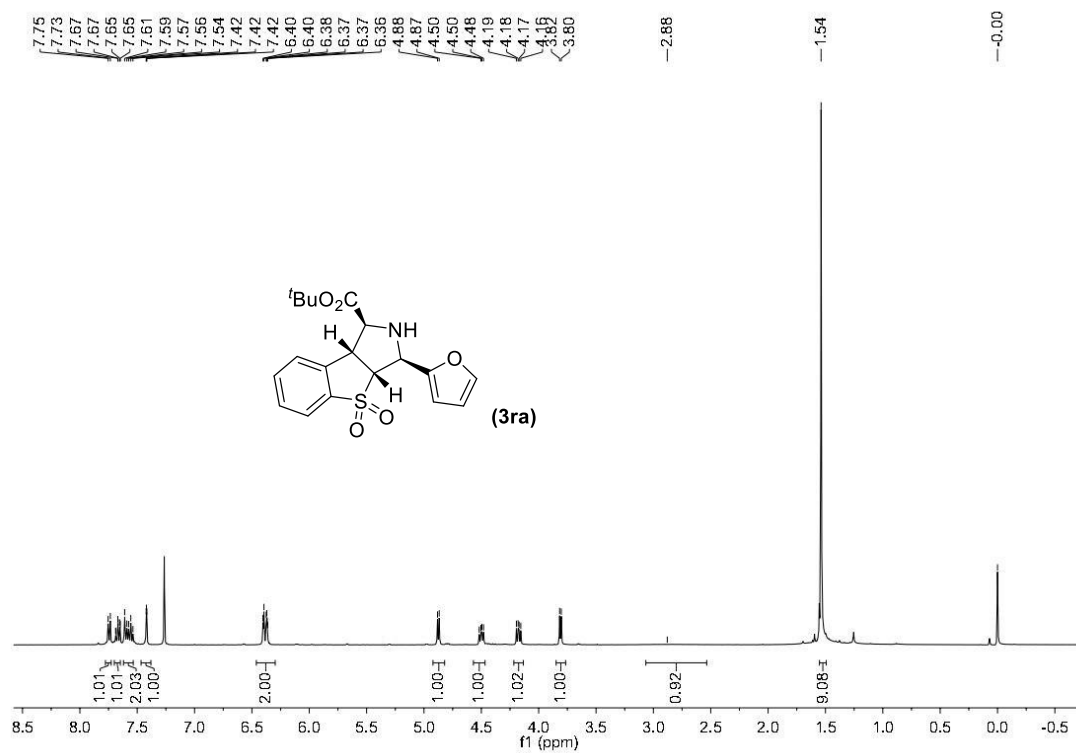

**<sup>13</sup>C NMR spectrum of compound 3ra (CDCl<sub>3</sub>)**

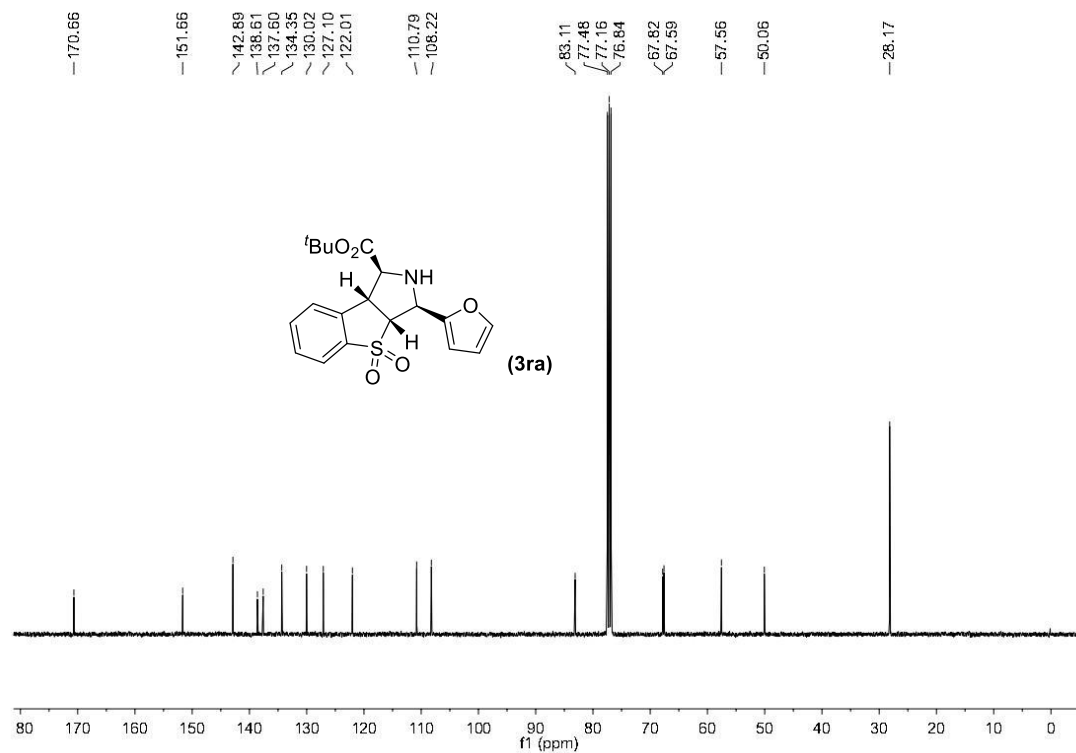

**<sup>1</sup>H NMR spectrum of compound 3sa (CDCl<sub>3</sub>)**

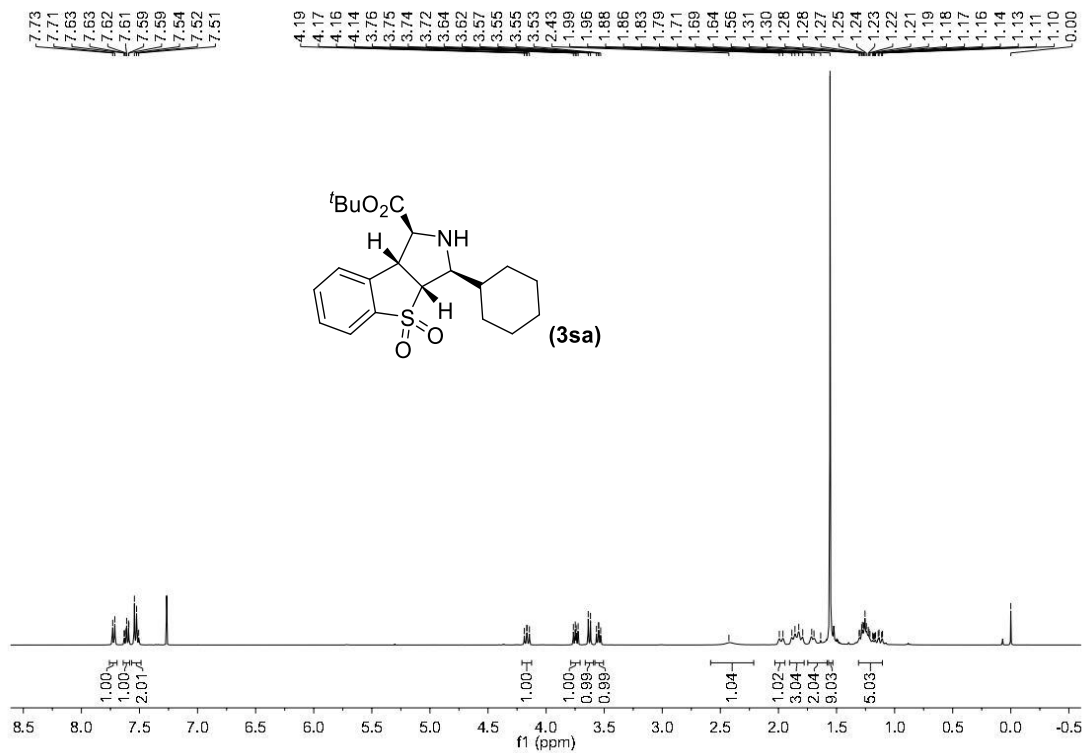

**<sup>13</sup>C NMR spectrum of compound 3sa (CDCl<sub>3</sub>)**

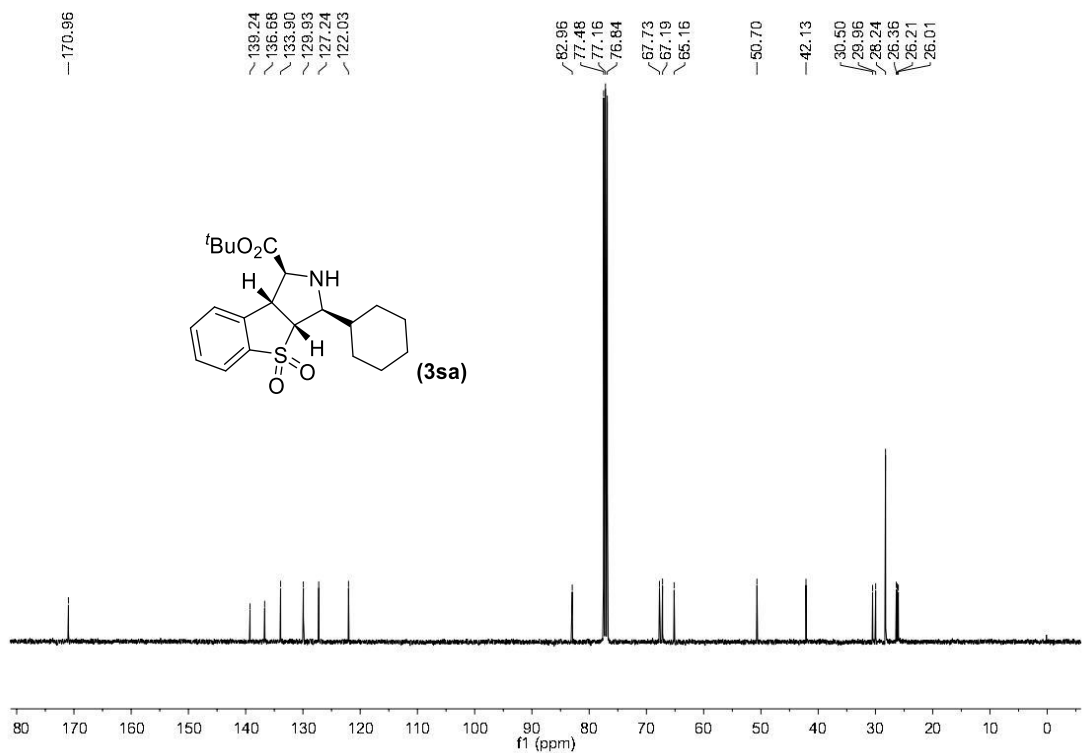

**<sup>1</sup>H NMR spectrum of compound 3cb (CDCl<sub>3</sub>)**

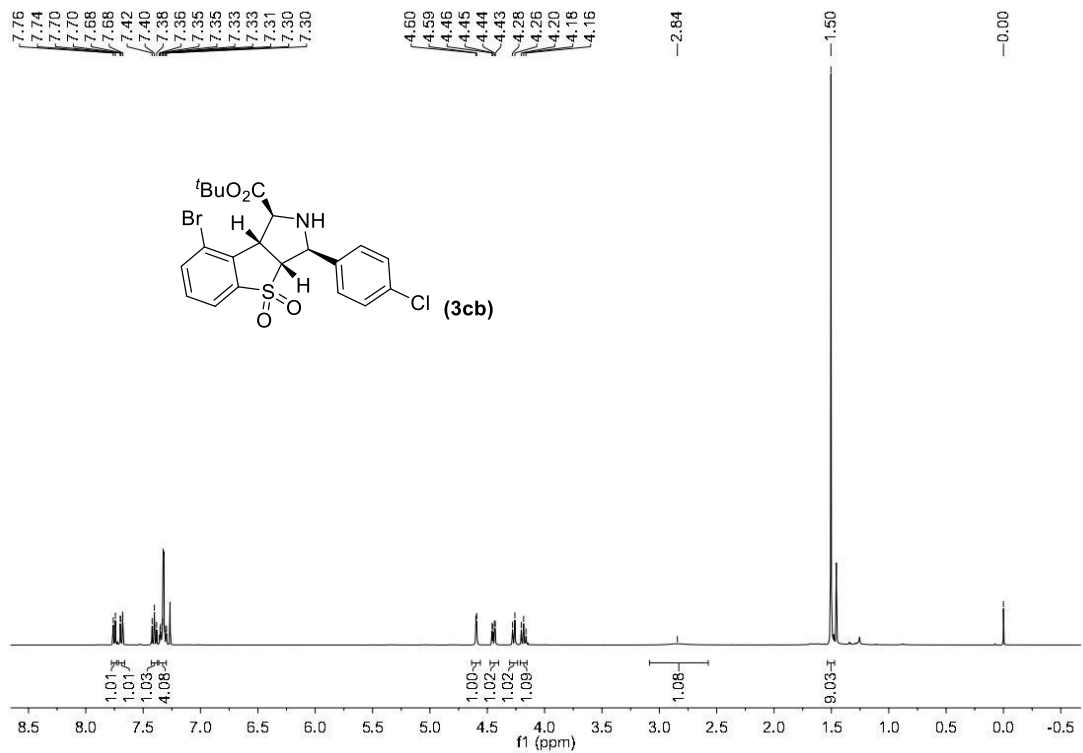

<sup>13</sup>C NMR spectrum of compound 3cb (CDCl<sub>3</sub>)

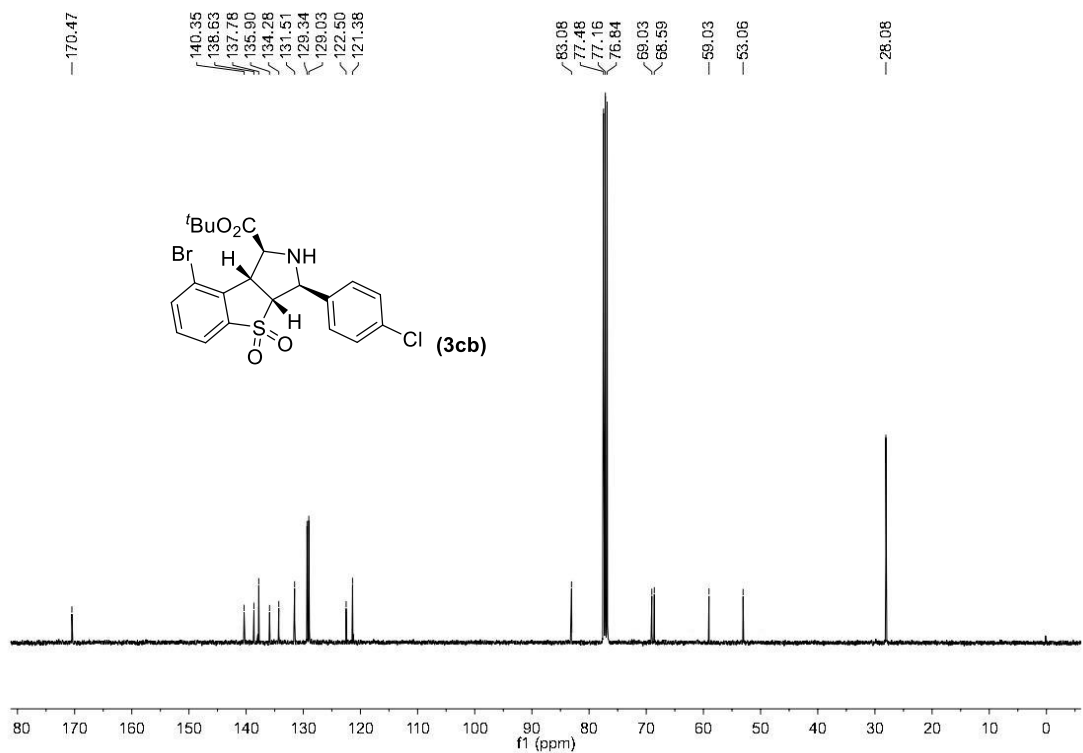

<sup>1</sup>H NMR spectrum of compound 3cc (CDCl<sub>3</sub>)

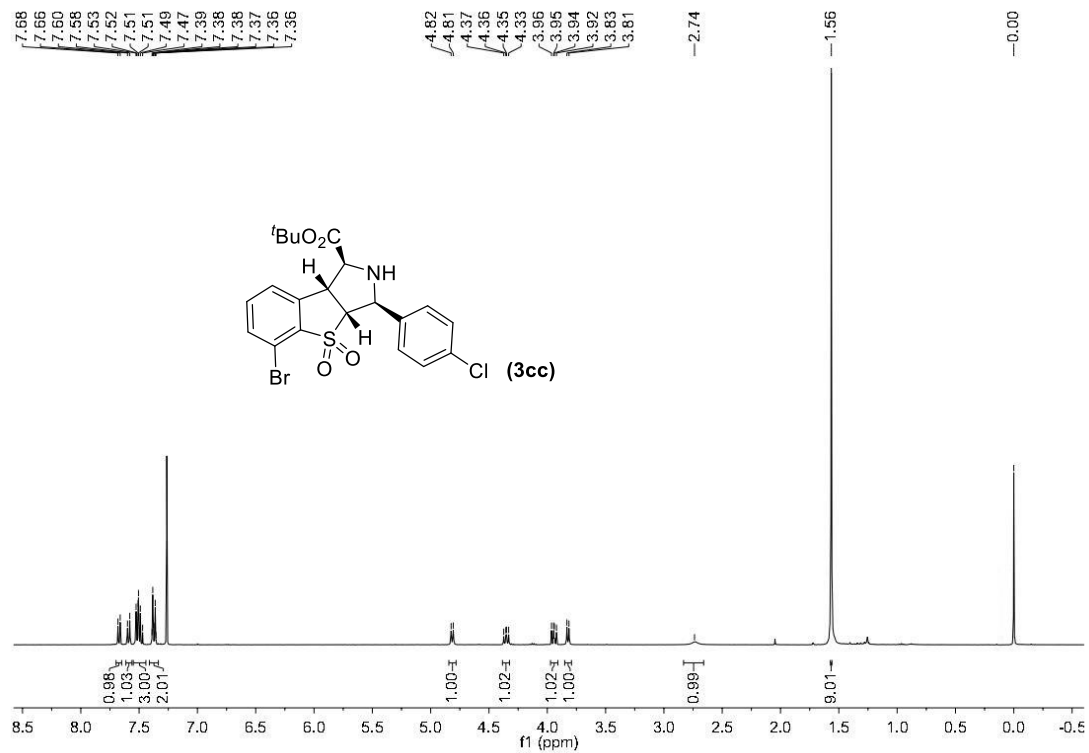

**<sup>13</sup>C NMR spectrum of compound 3cc (CDCl<sub>3</sub>)**

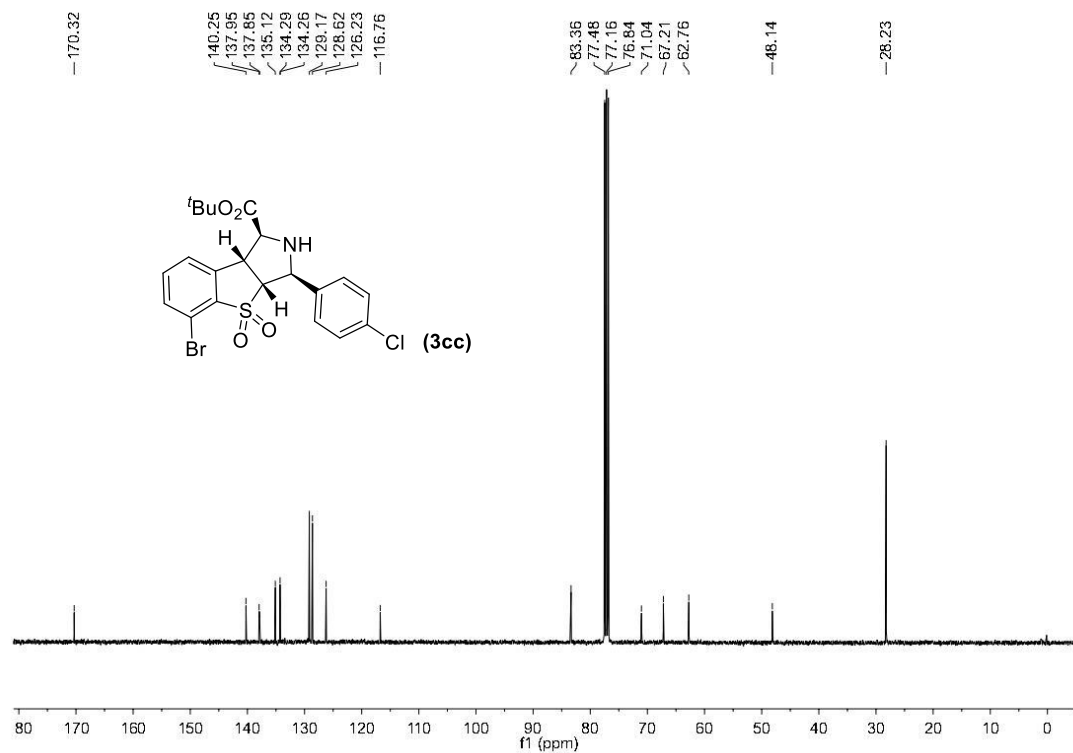

**<sup>1</sup>H NMR spectrum of compound 3cd (CDCl<sub>3</sub>)**

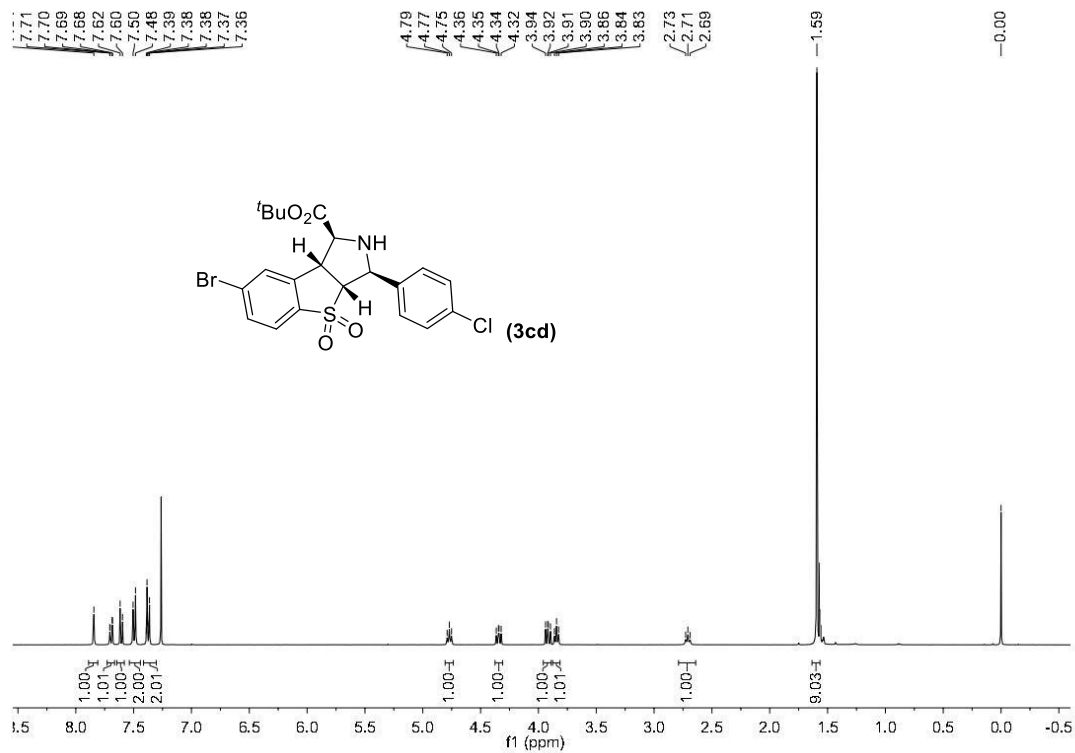

**<sup>13</sup>C NMR spectrum of compound 3cd (CDCl<sub>3</sub>)**

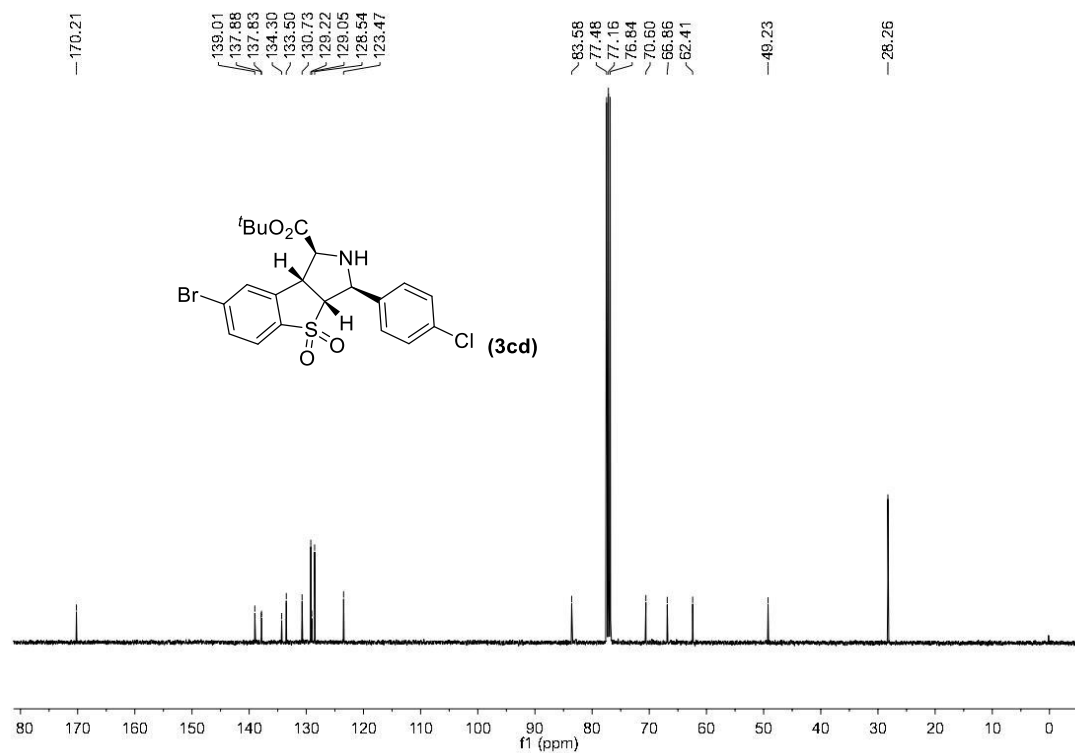

**<sup>1</sup>H NMR spectrum of compound 3ce(CDCl<sub>3</sub>)**



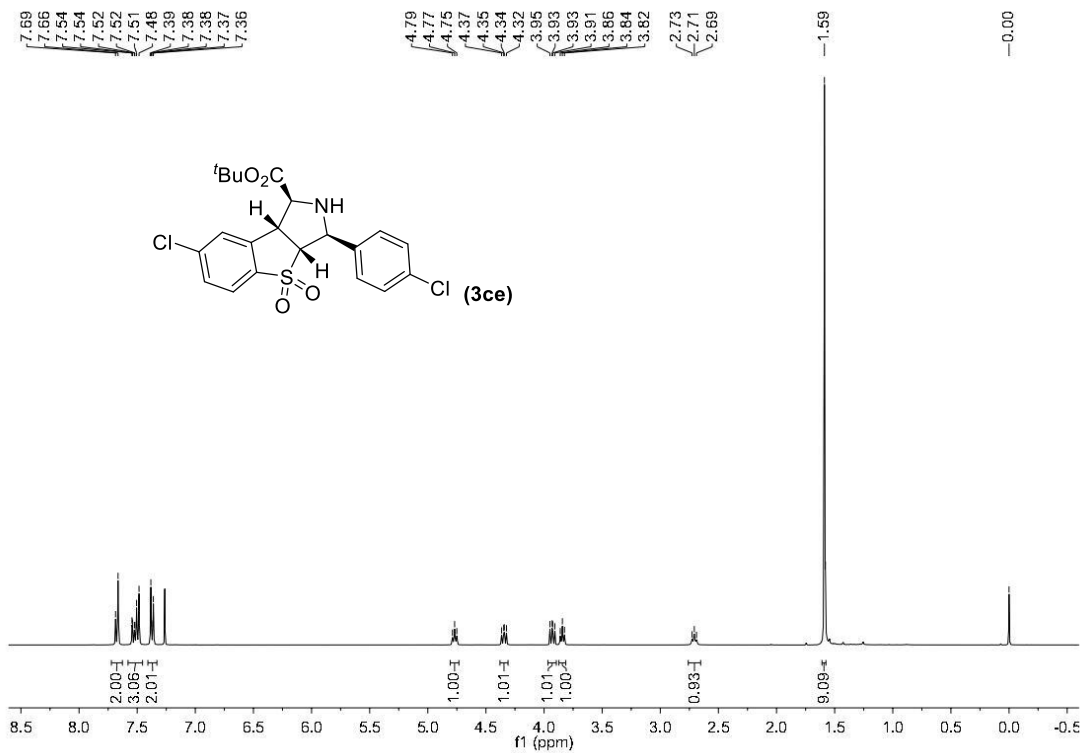

<sup>13</sup>C NMR spectrum of compound 3ce (CDCl<sub>3</sub>)

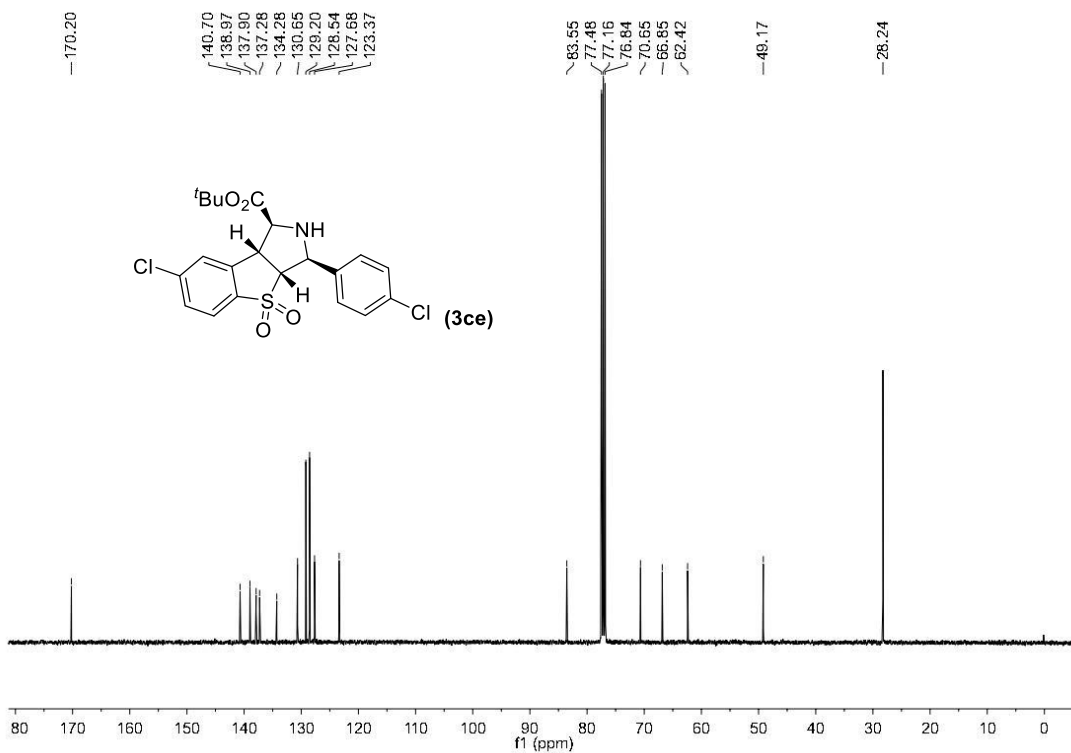

<sup>1</sup>H NMR spectrum of compound 3cf (CDCl<sub>3</sub>)

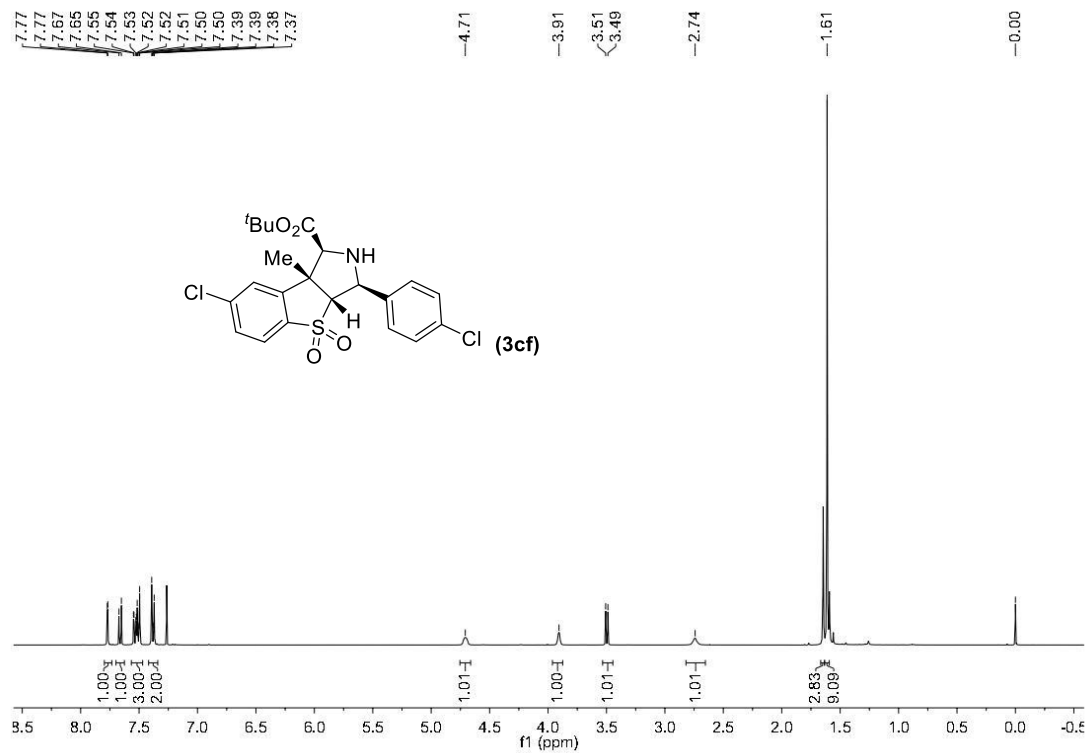

**<sup>13</sup>C NMR spectrum of compound **3cf** (CDCl<sub>3</sub>)**

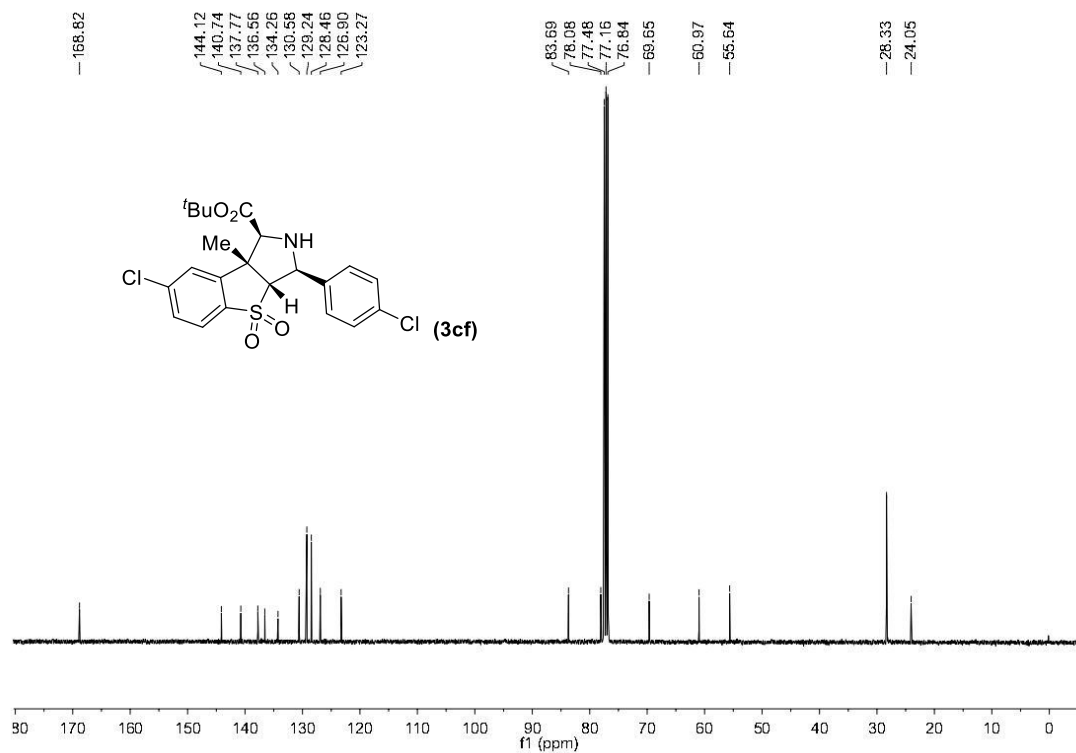

**<sup>1</sup>H NMR spectrum of compound **3gf** (CDCl<sub>3</sub>)**

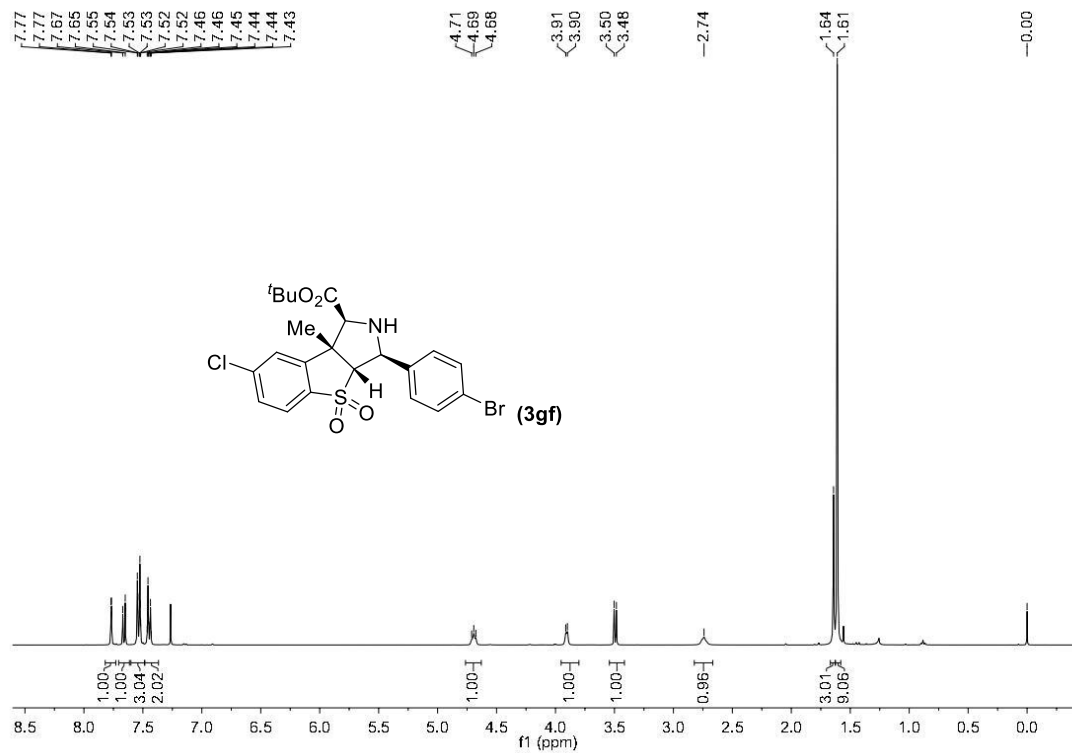

**<sup>13</sup>C NMR spectrum of compound **3gf** (CDCl<sub>3</sub>)**

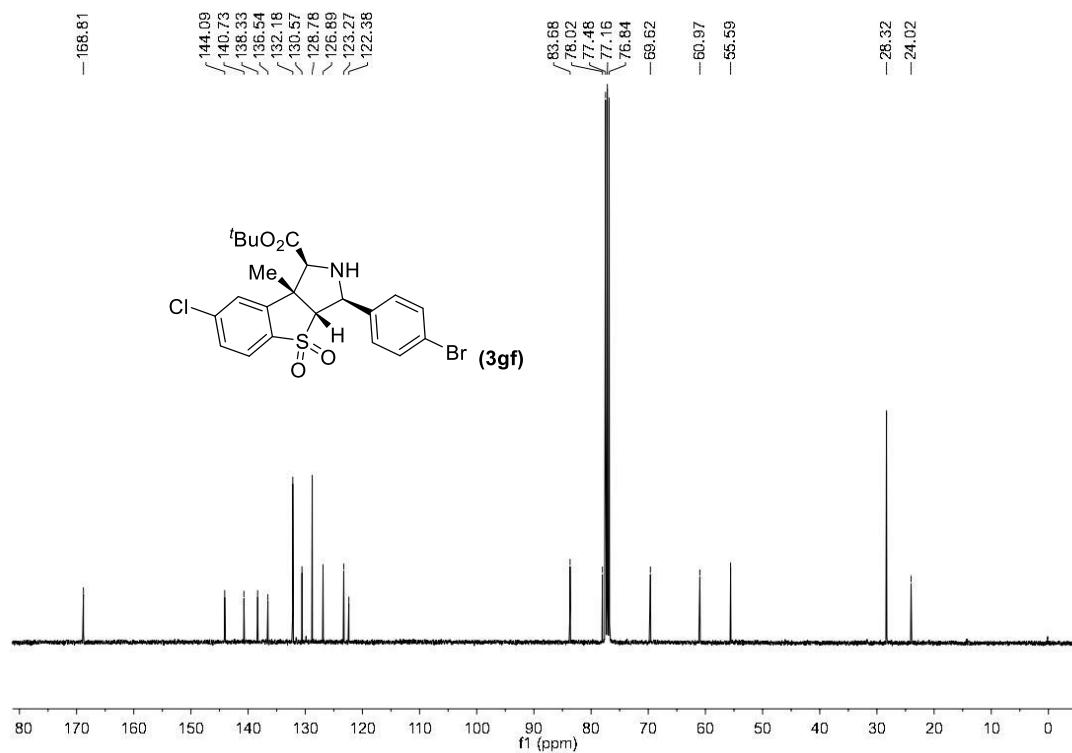

**<sup>1</sup>H NMR spectrum of compound **3jf**(CDCl<sub>3</sub>)**

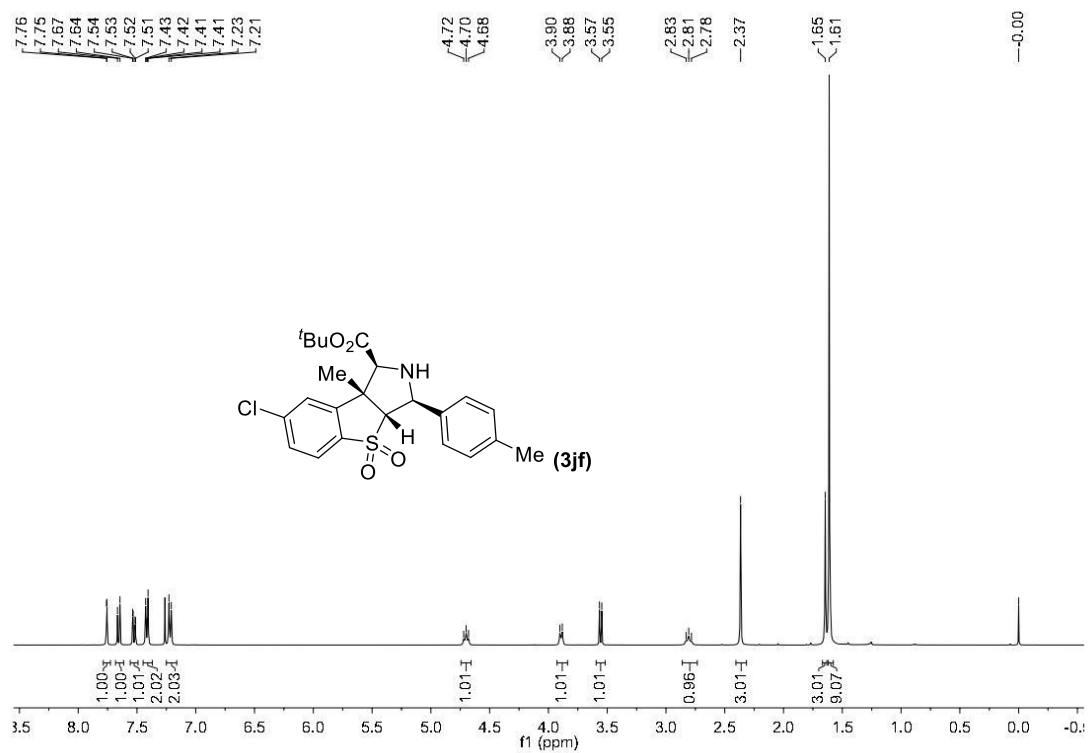

**<sup>13</sup>C NMR spectrum of compound **3jf** (CDCl<sub>3</sub>)**

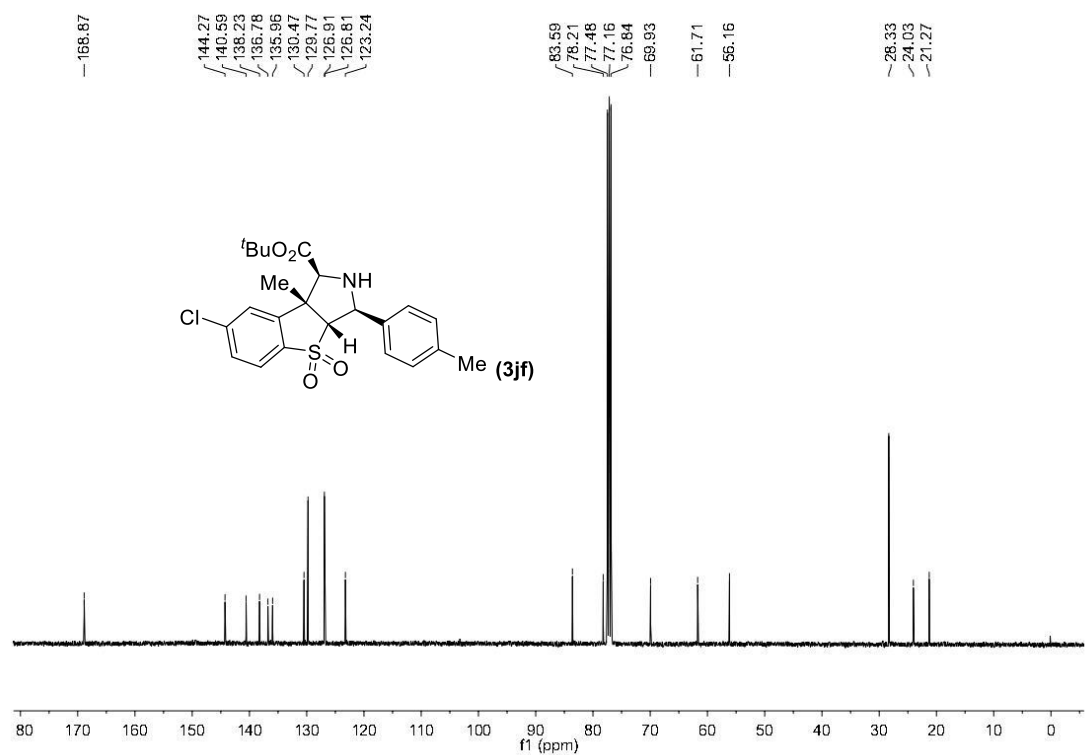

**<sup>1</sup>H NMR spectrum of compound **3lf** (CDCl<sub>3</sub>)**

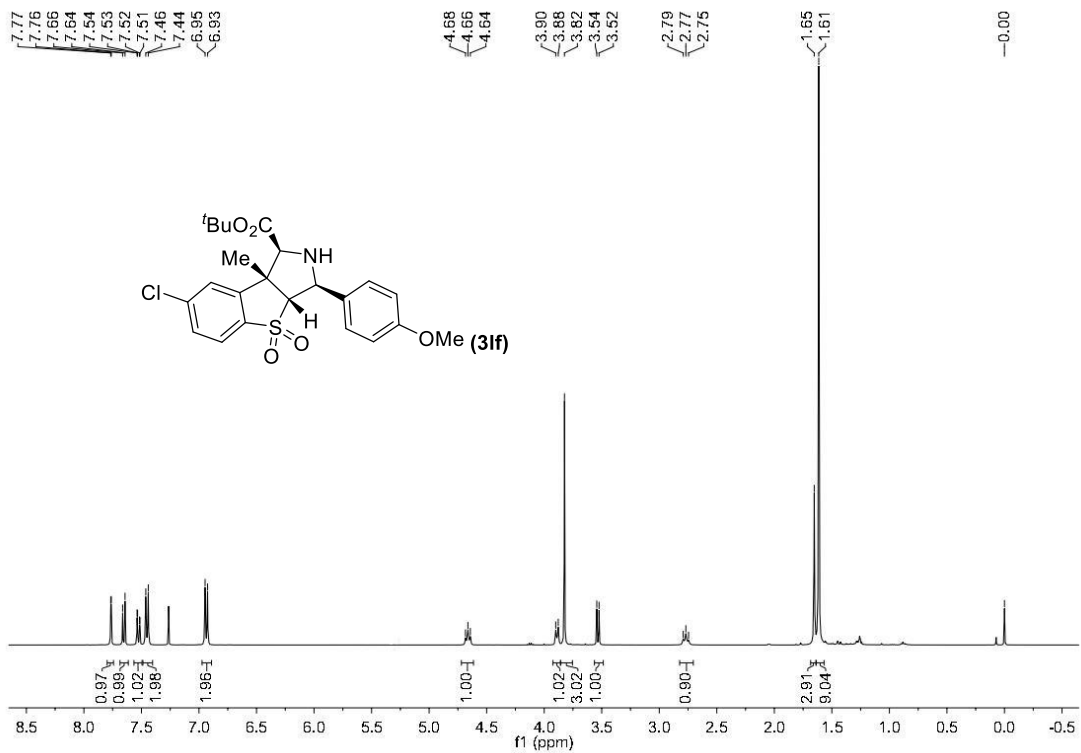

**<sup>13</sup>C NMR spectrum of compound **3f** (CDCl<sub>3</sub>)**

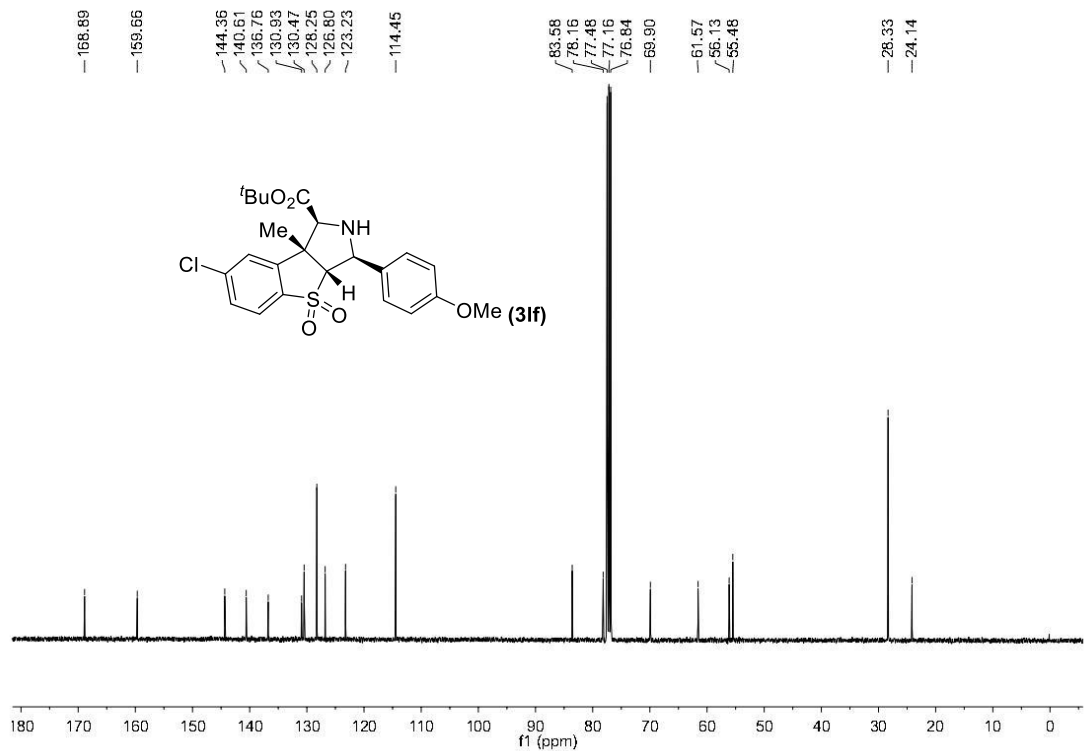

**<sup>1</sup>H NMR spectrum of compound **3nf** (CDCl<sub>3</sub>)**

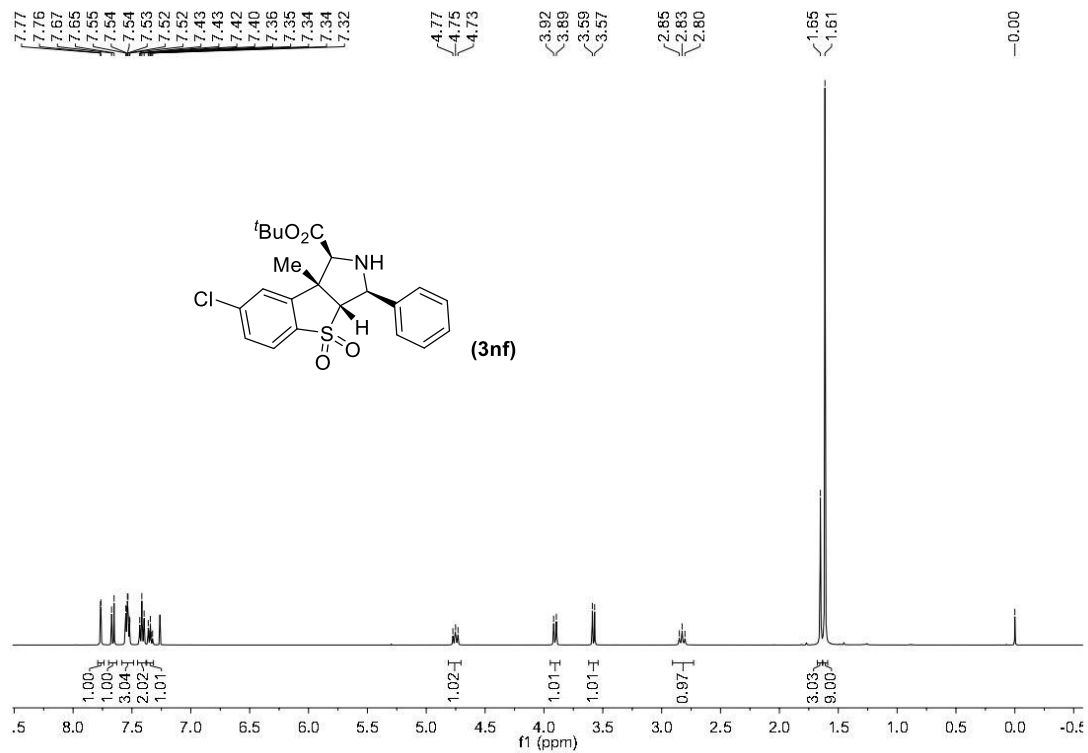

**<sup>13</sup>C NMR spectrum of compound 3nf (CDCl<sub>3</sub>)**

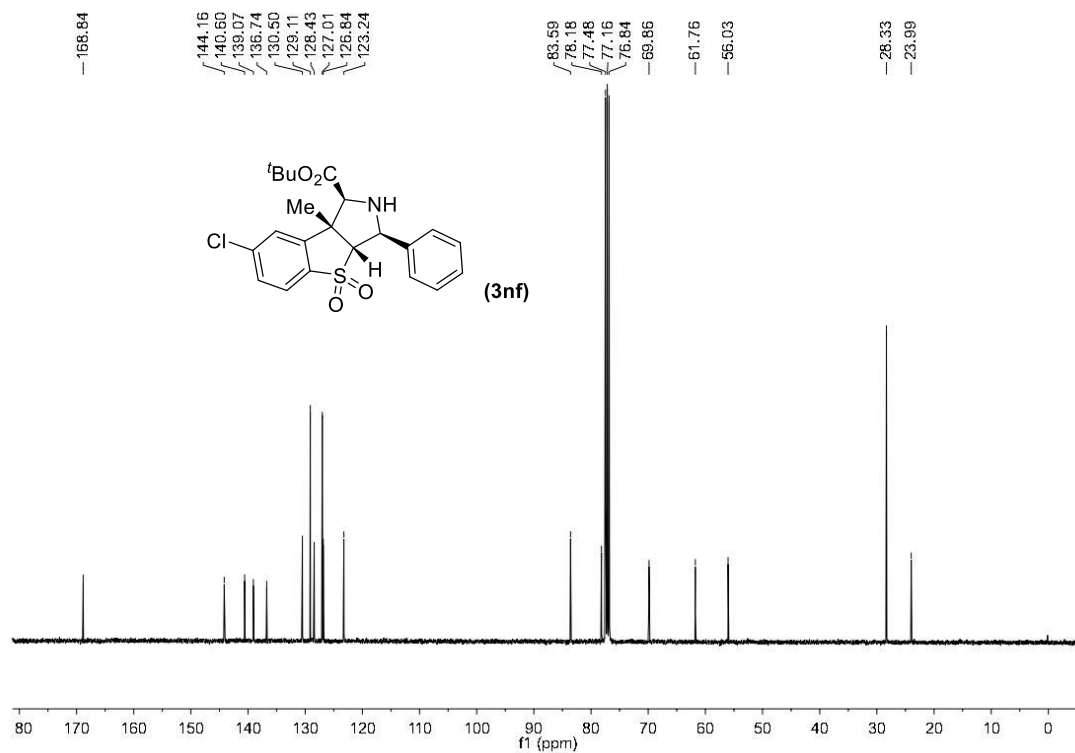

**<sup>1</sup>H NMR spectrum of compound 4 (CDCl<sub>3</sub>)**

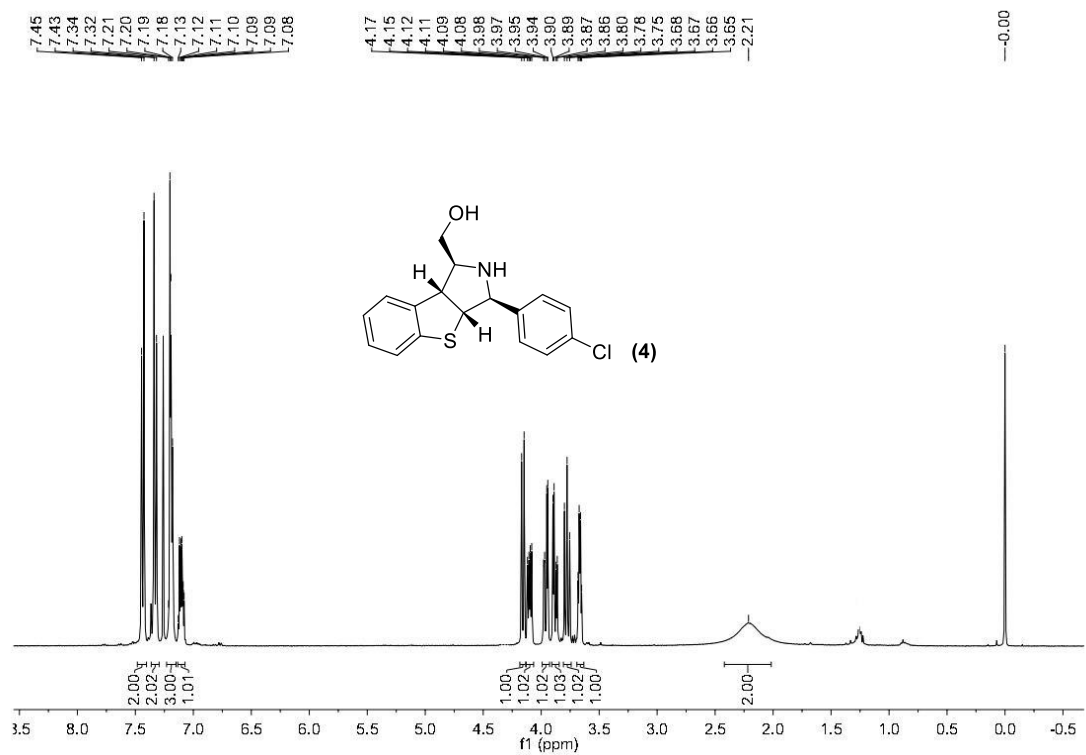

<sup>13</sup>C NMR spectrum of compound 4 (CDCl<sub>3</sub>)

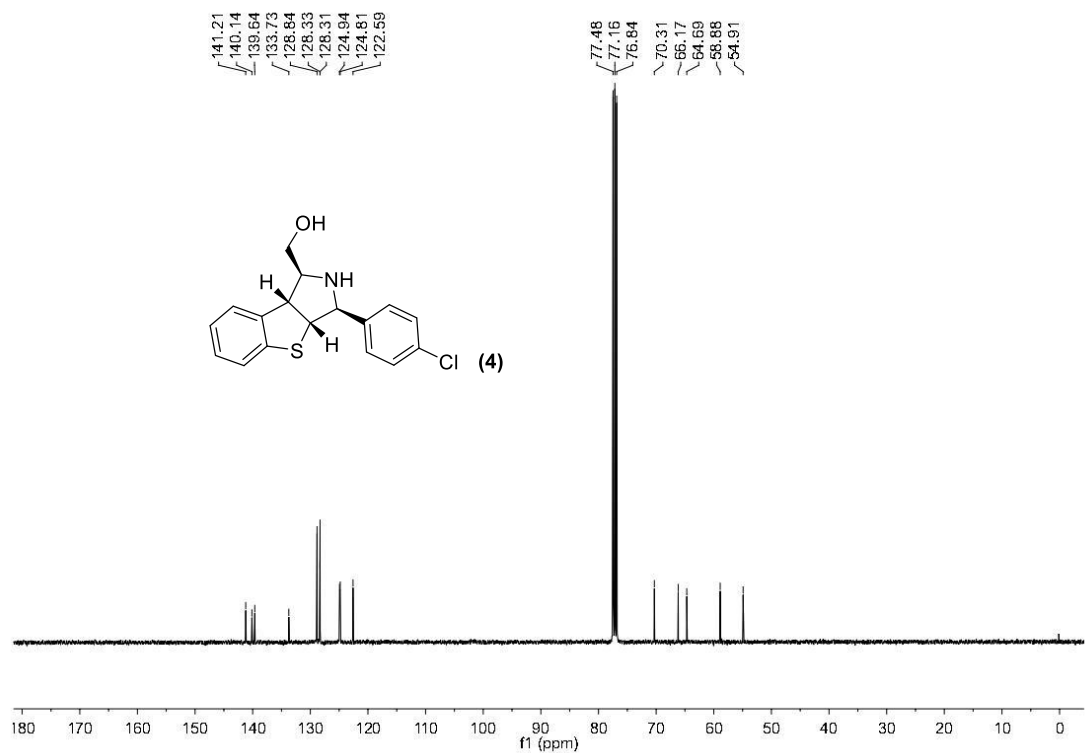

<sup>1</sup>H NMR spectrum of compound 5 (CDCl<sub>3</sub>)

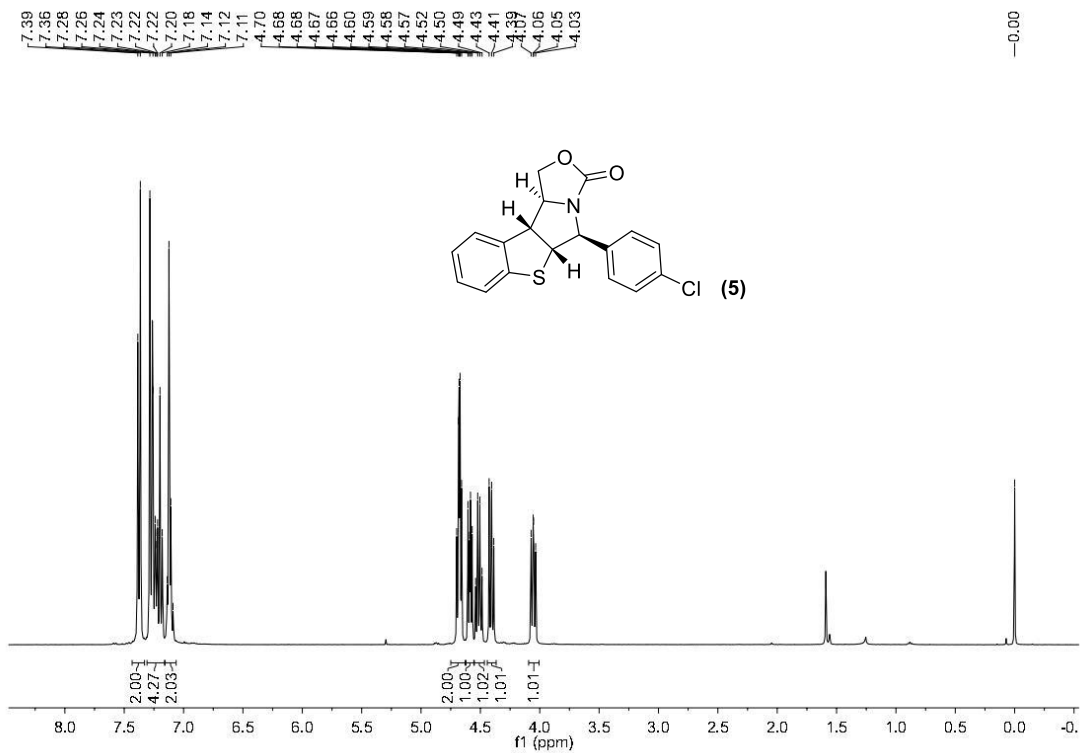

<sup>13</sup>C NMR spectrum of compound **5** (CDCl<sub>3</sub>)

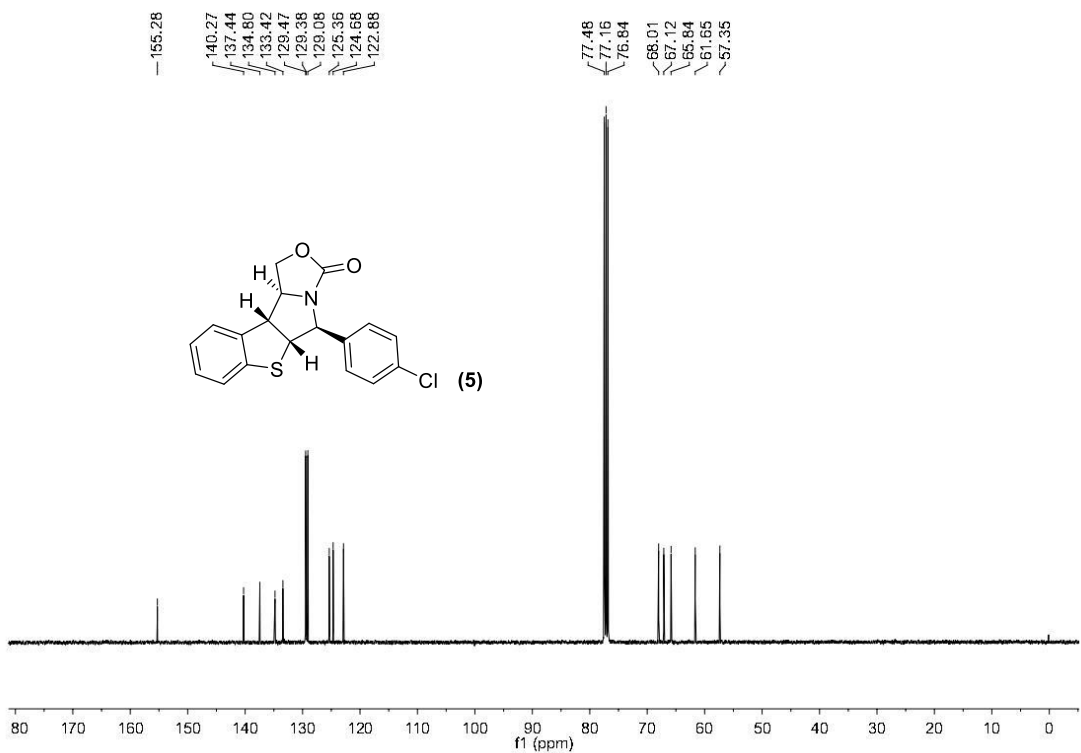

Supplement: c7qo00640c1.pdf [file c7qo00640c1.pdf]
